# Supplementary material for: Structural variants in 3000 rice genomes
Source: Genome Res. 2019 May;29(5):870–80. doi: 10.1101/gr.241240.118 (PMC6499320; doi:10.1101/gr.241240.118)
Supplement: Supplemental Material [file supp_gr.241240.118_Supplemental_Data.xlsx]

## Sheet: Deleted Genes
System	Gene Category	List Hits	List Total	Population Hits	Population Total	Probability	Bonferroni	Hochberg
	Indica
CLASS_GO-FULL_MSU7	P|GO:0008150|biological_process	390	1212	8008	32782	3.14362e-10	6.55e-07	6.28e-07
CLASS_GO-FULL_MSU7	P|GO:0008152|metabolic process	358	1212	7518	32782	3.56309e-08	7.42e-05	7.04e-05
CLASS_mapman-path_msu7	26.12_misc.peroxidases	20	1785	145	55785	4.43832e-08	9.25e-05	8.75e-05
CLASS_GO-FULL_MSU7	C|GO:0009536|plastid	178	1212	3252	32782	5.76695e-08	0.00012	0.000114
CLASS_GO-FULL_MSU7	C|GO:0048046|apoplast	17	1212	95	32782	6.79967e-08	0.000142	0.000134
CLASS_GO-FULL_MSU7	P|GO:0006979|response to oxidative stress	22	1212	171	32782	3.93885e-07	0.00082	0.000767
CLASS_GO-FULL_MSU7	P|GO:0009719|response to endogenous stimulus	91	1212	1451	32782	6.82705e-07	0.00142	0.00132
CLASS_mapman-path_msu7	17.2.3_hormone metabolism.auxin.induced-regulated-responsive-activated	18	1785	142	55785	7.40226e-07	0.00154	0.00144
CLASS_GO-FULL_MSU7	C|GO:0009579|thylakoid	45	1212	554	32782	8.52651e-07	0.00178	0.00165
CLASS_GO-FULL_MSU7	C|GO:0016020|membrane	205	1212	4025	32782	9.89049e-07	0.00206	0.00192
CLASS_GO-FULL_MSU7	P|GO:0006950|response to stress	185	1212	3570	32782	1.25019e-06	0.0026	0.00242
CLASS_GO-FULL_MSU7	C|GO:0005622|intracellular	98	1212	1626	32782	1.46601e-06	0.00305	0.00283
CLASS_GO-FULL_MSU7	F|GO:0004601|peroxidase activity	21	1212	172	32782	1.7045e-06	0.00355	0.00329
CLASS_GO-FULL_MSU7	P|GO:0006412|translation	51	1212	684	32782	2.05841e-06	0.00429	0.00397
CLASS_GO-FULL_MSU7	F|GO:0003735|structural constituent of ribosome	35	1212	396	32782	2.14475e-06	0.00447	0.00413
CLASS_GO-FULL_MSU7	F|GO:0005198|structural molecule activity	41	1212	514	32782	4.04085e-06	0.00842	0.00777
CLASS_mapman-path_msu7	20.2.99_stress.abiotic.unspecified	13	1785	88	55785	4.54758e-06	0.00947	0.00874
CLASS_GO-FULL_MSU7	F|GO:0003674|molecular_function	277	1212	5867	32782	4.97978e-06	0.0104	0.00955
CLASS_GO-FULL_MSU7	C|GO:0005840|ribosome	38	1212	496	32782	2.21055e-05	0.046	0.0419
CLASS_GO-FULL_MSU7	F|GO:0030145|manganese ion binding	10	1212	58	32782	4.76919e-05	0.0993	0.0903
CLASS_mapman-path_msu7	29.2.1.1.1.1.7_protein.synthesis.ribosomal protein.prokaryotic.chloroplast.30S subunit.S7	4	1785	8	55785	6.59617e-05	0.137	0.124
CLASS_GO-FULL_MSU7	C|GO:0015935|small ribosomal subunit	9	1212	51	32782	9.4007e-05	0.196	0.177
CLASS_GO-FULL_MSU7	F|GO:0045735|nutrient reservoir activity	11	1212	77	32782	0.00012043	0.251	0.226
CLASS_GO-FULL_MSU7	F|GO:0020037|heme binding	40	1212	600	32782	0.000275678	0.574	0.515
CLASS_GO-FULL_MSU7	C|GO:0005575|cellular_component	235	1212	5192	32782	0.000435198	0.907	0.811
CLASS_mapman-path_msu7	27.3.40_RNA.regulation of transcription.Aux/IAA family	6	1785	32	55785	0.000471831	0.983	0.878
CLASS_mapman-path_msu7	23.1.1.10_nucleotide metabolism.synthesis.pyrimidine.CTP synthetase	3	1785	6	55785	0.000608333	1	1
CLASS_GO-FULL_MSU7	P|GO:0006730|one-carbon metabolic process	5	1212	20	32782	0.000667711	1	1
CLASS_GO-FULL_MSU7	C|GO:0005773|vacuole	67	1212	1213	32782	0.000765016	1	1
CLASS_GO-FULL_MSU7	F|GO:0003700|sequence-specific DNA binding transcription factor activity	94	1212	1832	32782	0.000853405	1	1
CLASS_GO-FULL_MSU7	F|GO:0003883|CTP synthase activity	3	1212	6	32782	0.000927078	1	1
CLASS_GO-FULL_MSU7	P|GO:0009058|biosynthetic process	208	1212	4614	32782	0.00120842	1	1
CLASS_GO-FULL_MSU7	F|GO:0016787|hydrolase activity	136	1212	2851	32782	0.00125155	1	1
CLASS_mapman-path_msu7	26.13_misc.acid and other phosphatases	9	1785	83	55785	0.00135175	1	1
CLASS_GO-FULL_MSU7	F|GO:0003998|acylphosphatase activity	2	1212	2	32782	0.00136581	1	1
CLASS_mapman-path_msu7	8.3_TCA / org. transformation.carbonic anhydrases	4	1785	16	55785	0.00139675	1	1
CLASS_GO-FULL_MSU7	F|GO:0003824|catalytic activity	191	1212	4216	32782	0.00157098	1	1
CLASS_GO-FULL_MSU7	F|GO:0045156|electron transporter, transferring electrons within the cyclic electron transport pathway of photosynthesis activity	4	1212	15	32782	0.00183013	1	1
CLASS_GO-FULL_MSU7	P|GO:0015979|photosynthesis	19	1212	243	32782	0.00185162	1	1
CLASS_mapman-path_msu7	23.3.3_nucleotide metabolism.salvage.NUDIX hydrolases	4	1785	18	55785	0.00223157	1	1
CLASS_GO-FULL_MSU7	P|GO:0009856|pollination	15	1212	175	32782	0.00223616	1	1
CLASS_mapman-path_msu7	16.8.2_secondary metabolism.flavonoids.chalcones	6	1785	43	55785	0.00235398	1	1
CLASS_GO-FULL_MSU7	P|GO:0006221|pyrimidine nucleotide biosynthetic process	3	1212	8	32782	0.00245511	1	1
CLASS_mapman-path_msu7	29.2.1.1.1.1.15_protein.synthesis.ribosomal protein.prokaryotic.chloroplast.30S subunit.S15	2	1785	3	55785	0.00300451	1	1
CLASS_mapman-path_msu7	29.2.1.1.1.1.4_protein.synthesis.ribosomal protein.prokaryotic.chloroplast.30S subunit.S4	2	1785	3	55785	0.00300451	1	1
CLASS_mapman-path_msu7	29.2.1.2.2.518_protein.synthesis.ribosomal protein.eukaryotic.60S subunit.L18A	2	1785	3	55785	0.00300451	1	1
CLASS_mapman-path_msu7	17.7.1.5_hormone metabolism.jasmonate.synthesis-degradation.12-Oxo-PDA-reductase	3	1785	10	55785	0.00331496	1	1
CLASS_mapman-path_msu7	33.99_development.unspecified	41	1785	817	55785	0.00349483	1	1
CLASS_GO-FULL_MSU7	C|GO:0030076|light-harvesting complex	3	1212	9	32782	0.00358176	1	1
CLASS_GO-FULL_MSU7	P|GO:0006952|defense response	28	1212	437	32782	0.00370638	1	1
CLASS_GO-FULL_MSU7	P|GO:0055114|oxidation-reduction process	67	1212	1305	32782	0.00446211	1	1
CLASS_GO-FULL_MSU7	P|GO:0006073|cellular glucan metabolic process	5	1212	30	32782	0.00451985	1	1
CLASS_GO-FULL_MSU7	F|GO:0016762|xyloglucan:xyloglucosyl transferase activity	5	1212	30	32782	0.00451985	1	1
CLASS_GO-FULL_MSU7	P|GO:0019684|photosynthesis, light reaction	4	1212	19	32782	0.00461949	1	1
CLASS_GO-FULL_MSU7	P|GO:0006091|generation of precursor metabolites and energy	22	1212	324	32782	0.00485746	1	1
	Aus
CLASS_mapman-path_msu7	30.2.19_signalling.receptor kinases.legume-lectin	6	68	41	55785	1.1375e-11	2.57e-09	2.48e-09
CLASS_GO-FULL_MSU7	F|GO:0031072|heat shock protein binding	4	51	119	32782	3.61517e-05	0.00817	0.00763
CLASS_GO-FULL_MSU7	F|GO:0016301|kinase activity	11	51	1990	32782	0.000200036	0.0452	0.0418
CLASS_mapman-path_msu7	10.2.1_cell wall.cellulose synthesis.cellulose synthase	2	68	31	55785	0.000665401	0.15	0.138
CLASS_GO-FULL_MSU7	F|GO:0016760|cellulose synthase (UDP-forming) activity	2	51	33	32782	0.00121483	0.275	0.234
CLASS_mapman-path_msu7	17.3.1.2.7_hormone metabolism.brassinosteroid.synthesis-degradation.sterols.DWF5	1	68	1	55785	0.00121897	0.275	0.234
CLASS_GO-FULL_MSU7	P|GO:0030244|cellulose biosynthetic process	2	51	36	32782	0.00144519	0.327	0.276
CLASS_GO-FULL_MSU7	P|GO:0019538|protein metabolic process	7	51	1134	32782	0.00178379	0.403	0.339
CLASS_GO-FULL_MSU7	F|GO:0004674|protein serine/threonine kinase activity	8	51	1472	32782	0.00184667	0.417	0.349
CLASS_GO-FULL_MSU7	C|GO:0005886|plasma membrane	12	51	3032	32782	0.00198507	0.449	0.373
CLASS_GO-FULL_MSU7	F|GO:0004672|protein kinase activity	8	51	1546	32782	0.00250698	0.567	0.459
CLASS_GO-FULL_MSU7	P|GO:0006468|protein phosphorylation	8	51	1550	32782	0.00254737	0.576	0.464
CLASS_GO-FULL_MSU7	F|GO:0004516|nicotinate phosphoribosyltransferase activity	1	51	2	32782	0.00310909	0.703	0.563
CLASS_mapman-path_msu7	29.4_protein.postranslational modification	5	68	825	55785	0.00338097	0.764	0.609
CLASS_GO-FULL_MSU7	P|GO:0009987|cellular process	20	51	7209	32782	0.00405407	0.916	0.722
CLASS_GO-FULL_MSU7	P|GO:0019363|pyridine nucleotide biosynthetic process	1	51	3	32782	0.00466008	1	0.825
CLASS_GO-FULL_MSU7	F|GO:0005515|protein binding	15	51	4773	32782	0.00485483	1	0.827
CLASS_mapman-path_msu7	29.2.1.1.1.2.27_protein.synthesis.ribosomal protein.prokaryotic.chloroplast.50S subunit.L27	1	68	4	55785	0.00486709	1	0.827
Aromatic
CLASS_GO-FULL_MSU7	F|GO:0005544|calcium-dependent phospholipid binding	1	8	11	32782	0.00268154	0.268	0.206
CLASS_mapman-path_msu7	3.2.2_minor CHO metabolism.trehalose.TPP	1	13	16	55785	0.00372259	0.372	0.279
CLASS_GO-FULL_MSU7	P|GO:0009719|response to endogenous stimulus	3	8	1451	32782	0.00409829	0.41	0.303

## Sheet: Known SVs in Genes
Known Structural Variants
GW5	GL7	AG1
Insertion(chr05:5360575)	Duplication(chr07:24664438-24681666)	Deletion(chr09:12243326-12264215 )
IRIS_313-11786	CX226	B047
IRIS_313-11761	B018	IRIS_313-10238
IRIS_313-11758	B037	IRIS_313-11889
IRIS_313-11671	B053	IRIS_313-8616
IRIS_313-11750	B054	IRIS_313-10298
IRIS_313-11673	B191	IRIS_313-11250
IRIS_313-11929	CX225	CX382
CX142	CX280	IRIS_313-7636
CX353	CX281	IRIS_313-9044
IRIS_313-11046	CX305	IRIS_313-7689
IRIS_313-11234	CX362	IRIS_313-7780
IRIS_313-11395	CX363	IRIS_313-10349
IRIS_313-11436	CX395	CX234
IRIS_313-11755	CX43	CX29
IRIS_313-7902	CX46	B032
IRIS_313-10892	CX77	B214
IRIS_313-11809	IRIS_313-10041	B217
	IRIS_313-10161	CX147
	IRIS_313-10196	CX150
	IRIS_313-10257	CX21
	IRIS_313-10258	CX225
	IRIS_313-10263	CX230
	IRIS_313-10272	CX238
	IRIS_313-10275	CX28
	IRIS_313-10318	CX304
	IRIS_313-10397	CX307
	IRIS_313-10398	CX317
	IRIS_313-10400	CX363
	IRIS_313-10401	CX364
	IRIS_313-10402	CX392
	IRIS_313-10444	CX45
	IRIS_313-10708	CX64
	IRIS_313-10752	CX97
	IRIS_313-10958	IRIS_313-10237
	IRIS_313-10999	IRIS_313-10293
	IRIS_313-11156	IRIS_313-10333
	IRIS_313-11539	IRIS_313-10337
	IRIS_313-11784	IRIS_313-10352
	IRIS_313-12051	IRIS_313-10650
	IRIS_313-12069	IRIS_313-10688
	IRIS_313-12108	IRIS_313-10777
	IRIS_313-12271	IRIS_313-10814
	IRIS_313-12285	IRIS_313-10820
	IRIS_313-15902	IRIS_313-10996
	IRIS_313-15907	IRIS_313-11192
	IRIS_313-15910	IRIS_313-11206
	IRIS_313-7808	IRIS_313-11234
	IRIS_313-7826	IRIS_313-11251
	IRIS_313-7868	IRIS_313-11437
	IRIS_313-8041	IRIS_313-11471
	IRIS_313-8044	IRIS_313-11517
	IRIS_313-8046	IRIS_313-11646
	IRIS_313-8050	IRIS_313-11656
	IRIS_313-8057	IRIS_313-11763
	IRIS_313-8060	IRIS_313-11784
	IRIS_313-8061	IRIS_313-11798
	IRIS_313-8062	IRIS_313-11930
	IRIS_313-8064	IRIS_313-11941
	IRIS_313-8065	IRIS_313-11978
	IRIS_313-8074	IRIS_313-12024
	IRIS_313-8076	IRIS_313-7911
	IRIS_313-8102	IRIS_313-8407
	IRIS_313-8158	IRIS_313-8493
	IRIS_313-8159	IRIS_313-8557
	IRIS_313-8160	IRIS_313-8967
	IRIS_313-8170	IRIS_313-9602
	IRIS_313-8172	IRIS_313-9685
	IRIS_313-8173	IRIS_313-9697
	IRIS_313-8180	IRIS_313-9867
	IRIS_313-8183	IRIS_313-9922
	IRIS_313-8185	IRIS_313-10772
	IRIS_313-8186	IRIS_313-7832
	IRIS_313-8192	B019
	IRIS_313-8193	CX237
	IRIS_313-8200	CX24
	IRIS_313-8202	CX31
	IRIS_313-8205	CX35
	IRIS_313-8213	CX362
	IRIS_313-8214	CX375
	IRIS_313-8285	CX403
	IRIS_313-8339	CX426
	IRIS_313-8434	CX50
	IRIS_313-8658	CX6
	IRIS_313-8803	CX73
	IRIS_313-8923	IRIS_313-10113
	IRIS_313-8960	IRIS_313-10161
	IRIS_313-8976	IRIS_313-10220
	IRIS_313-9363	IRIS_313-10235
	IRIS_313-9452	IRIS_313-10260
	IRIS_313-9464	IRIS_313-10268
	IRIS_313-9491	IRIS_313-10279
	IRIS_313-9550	IRIS_313-10301
	IRIS_313-9648	IRIS_313-10314
	IRIS_313-9841	IRIS_313-10325
	IRIS_313-9939	IRIS_313-10385
	IRIS_313-9940	IRIS_313-10392
	CX270	IRIS_313-10402
	IRIS_313-12241	IRIS_313-10514
	IRIS_313-8911	IRIS_313-10525
	IRIS_313-9966	IRIS_313-10698
	IRIS_313-11929	IRIS_313-10806
	IRIS_313-8067	IRIS_313-11000
	IRIS_313-11253	IRIS_313-11233
	IRIS_313-10325	IRIS_313-11253
	CX73	IRIS_313-11438
	IRIS_313-8894	IRIS_313-11510
	CX32	IRIS_313-11807
	IRIS_313-7636	IRIS_313-11850
	IRIS_313-10062	IRIS_313-11887
	IRIS_313-8935	IRIS_313-11905
	CX361	IRIS_313-11960
		IRIS_313-12079
		IRIS_313-12080
		IRIS_313-15900
		IRIS_313-15901
		IRIS_313-7664
		IRIS_313-7688
		IRIS_313-7699
		IRIS_313-7792
		IRIS_313-7808
		IRIS_313-7809
		IRIS_313-7819
		IRIS_313-8368
		IRIS_313-8514
		IRIS_313-8978
		IRIS_313-9329
		IRIS_313-9600
		IRIS_313-9925
		IRIS_313-9940
		IRIS_313-9966
		CX358
		CX286
		IRIS_313-10396
		IRIS_313-10054
		IRIS_313-9017
		IRIS_313-12354
		IRIS_313-7641
		IRIS_313-9623
		CX17
		B153
		IRIS_313-11538
		CX161
		CX561
		IRIS_313-11382
		IRIS_313-7820
		IRIS_313-10706
		IRIS_313-12269
		IRIS_313-10290
		CX226
		IRIS_313-10423
		IRIS_313-11280
		IRIS_313-10285
		B084
		B195
		IRIS_313-11937
		CX156

## Sheet: QTARO Genes
QTARO GENES					DELETIONS
CHR	START	END	GENE_ID	GENE INFO	CHR	START	END	LENGTH	CLUSTER_ID	OVERLAP(bp)
chr01	133291	134676	Os01g0102300	OsTLP27;Physiological trait;Source activity	chr01	94495	133684	39189	81	393
chr01	247707	255878	Os01g0104600	OsDET1;Physiological trait;Source activity	chr01	254386	254920	534	282	534
chr01	326128	327450	Os01g0106400	OsIRL;Resistance or Tolerance;Other stress resistance	chr01	325961	326938	977	581	810
chr01	1045390	1052166	Os01g0118300	sui1;Morphological trait;Dwarf	chr01	1045591	1045604	13	3384	13
chr01	1346773	1347723	Os01g0124400	IBP1.1;Physiological trait;Root	chr01	1345944	1348612	2668	4432	950
chr01	1950930	1951681	Os01g0136200	OsHsp17.0;Physiological trait;Germination dormancy	chr01	1951015	1951097	82	5361	82
chr01	3723560	3728284	Os01g0172400	OsPLDα1;Resistance or Tolerance;Salinity tolerance	chr01	3683315	3777605	94290	10783	4724
chr01	3741778	3743434	Os01g0173100	OsAlba1;Resistance or Tolerance;Drought tolerance	chr01	3683315	3777605	94290	10783	1656
chr01	4002659	4003887	Os01g0177400	d18;Morphological trait;Dwarf	chr01	3905291	4364678	459387	11512	1228
chr01	4032754	4035223	Os01g0177900	OsABCG31;Resistance or Tolerance;Drought tolerance	chr01	4033593	4033859	266	12104	266
chr01	4065347	4066319	Os01g0178300	OsCDT3;Resistance or Tolerance;Other soil stress tolerance	chr01	3905291	4364678	459387	11512	972
chr01	4072916	4075438	Os01g0178500	OsIAA1;Morphological trait;Culm leaf	chr01	3905291	4364678	459387	11512	2522
chr01	4080313	4081684	Os01g0178600	OsCDR1;Resistance or Tolerance;Bacterial blight resistance	chr01	3905291	4364678	459387	11512	1371
chr01	4126450	4128197	NA	ssg4;Morphological trait;Seed	chr01	3905291	4364678	459387	11512	1747
chr01	4328362	4337234	Os01g0182600	OsGI;Physiological trait;Flowering	chr01	4332699	4333172	473	12846	473
chr01	4527237	4531870	Os01g0185300	AFT;Others;Others	chr01	4528267	4528279	12	13397	12
chr01	4948133	4950123	Os01g0192000	OsDOS;Physiological trait;Source activity	chr01	4949689	4949709	20	14405	20
chr01	5059605	5064209	Os01g0194300	NH1;Resistance or Tolerance;Bacterial blight resistance	chr01	5059839	5059849	10	14620	10
chr01	5235623	5243062	Os01g0197100	d2;Morphological trait;Culm leaf	chr01	5237482	5237506	24	14938	24
chr01	5269449	5274585	Os01g0197700	Gn1a;Morphological trait;Panicle flower	chr01	5269616	5270003	387	14951	387
chr01	5529078	5529470	NA	D-h;Morphological trait;Dwarf	chr01	5183518	5660598	477080	14896	392
chr01	5548631	5549983	Os01g0201600	OsGAE1;Morphological trait;Dwarf	chr01	5549597	5549607	10	15379	10
chr01	5558512	5567904	Os01g0201700	mads3;Physiological trait;Sterility	chr01	5559026	5559045	19	15408	19
chr01	5773273	5777413	Os01g0205700	OsGSK1;Resistance or Tolerance;Cold tolerance	chr01	5774602	5774617	15	16014	15
chr01	5898541	5908570	Os01g0208700	Osppc4;Physiological trait;Source activity	chr01	5901651	5901993	342	16202	342
chr01	7023277	7029571	Os01g0227100	nyc1;Physiological trait;Source activity	chr01	7024014	7024027	13	18577	13
chr01	8656066	8657446	Os01g0258600	DPL1;Physiological trait;Sterility	chr01	8656268	8657078	810	21471	810
chr01	8884740	8890424	Os01g0262600	OsGT1;Physiological trait;Sterility	chr01	8886077	8886349	272	21958	272
chr01	10705422	10708091	Os01g0293000	OsSAMS3;Morphological trait;Dwarf	chr01	10704463	10705714	1251	25758	292
chr01	10713549	10714752	Os01g0293100	bHLH142;Morphological trait;Lethality	chr01	10713011	10720326	7315	25782	1203
chr01	11214999	11222407	Os01g0302500	OSH6;Morphological trait;Culm leaf	chr01	11099133	11397279	298146	27008	7408
chr01	11506912	11511398	Os01g0307500	SKC1;Resistance or Tolerance;Salinity tolerance	chr01	11507407	11507430	23	27763	23
chr01	13428762	13431104	Os01g0338000	Sar1a;Physiological trait;Eating quality	chr01	13428226	13429982	1756	33459	1220
chr01	14589569	14596120	Os01g0357100	PSR;Others;Others	chr01	14592460	14592483	23	37465	23
chr01	15224863	15229762	Os01g0367100	phd1;Morphological trait;Dwarf	chr01	15223009	15231101	8092	39388	4899
chr01	16557151	16559156	Os01g0388000	CYP734A6;Morphological trait;Culm leaf	chr01	16548686	16560879	12193	42043	2005
chr01	19561619	19566881	Os01g0510100	OsMKK6;Resistance or Tolerance;Cold tolerance	chr01	19566319	19566389	70	48542	70
chr01	19807783	19814688	Os01g0513900	dbs1;Morphological trait;Dwarf	chr01	19809019	19809046	27	48900	27
chr01	20597234	20599878	Os01g0527600	OsRDR6;Morphological trait;Panicle flower	chr01	20599214	20599250	36	50027	36
chr01	22238470	22246428	Os01g0550100	osubp6;Morphological trait;Shoot seedling	chr01	22238478	22238488	10	53152	10
chr01	22887238	22891756	Os01g0559600	OsaLeg1;Others;Others	chr01	22888991	22889009	18	54715	18
chr01	23595710	23598642	Os01g0571300	OsHsfA7;Resistance or Tolerance;Drought tolerance	chr01	23593625	23606808	13183	56592	2932
chr01	24010037	24015250	Os01g0578000	RAD51C;Physiological trait;Sterility	chr01	24010015	24010043	28	58373	6
chr01	24032420	24034152	Os01g0578500	SaF;Physiological trait;Sterility	chr01	24019949	24044574	24625	58386	1732
chr01	24035904	24039721	Os01g0578700	SaM;Physiological trait;Sterility	chr01	24036644	24036664	20	58462	20
chr01	25951136	25956346	Os01g0612700	OsLOL2;Morphological trait;Dwarf	chr01	25956281	25956294	13	62401	13
chr01	26037483	26043346	Os01g0614900	OsATG7;Morphological trait;Dwarf	chr01	26040736	26041067	331	62684	331
chr01	26208906	26210836	Os01g0617600	OsAAT5;Physiological trait;Source activity	chr01	26210117	26210162	45	62951	45
chr01	26666360	26669079	Os01g0626400	OsWRKY11;Resistance or Tolerance;Drought tolerance	chr01	26659160	26679358	20198	63535	2719
chr01	26666426	26669079	Os01g0626400	DIF1;Morphological trait;Dwarf	chr01	26659160	26679358	20198	63535	2653
chr01	27010651	27018729	Os01g0633100	osagpl2;Physiological trait;Eating quality	chr01	27014759	27014771	12	64065	12
chr01	27011364	27018729	Os01g0633100	OsAGPL2;Morphological trait;Seed	chr01	27014759	27014771	12	64065	12
chr01	27039544	27041524	Os01g0633500	Rd;Morphological trait;Seed	chr01	26959237	27452541	493304	63844	1980
chr01	27396786	27403118	Os01g0639200	snl6;Resistance or Tolerance;Bacterial blight resistance	chr01	27401380	27407006	5626	64880	1738
chr01	27619548	27624190	Os01g0643300	OsPIN3t;Morphological trait;Culm leaf	chr01	27621358	27621563	205	65395	205
chr01	27800014	27801689	Os01g0646300	SLRL1;Morphological trait;Dwarf	chr01	27787663	27800052	12389	65804	38
chr01	29046116	29047653	Os01g0667400	DWT1;Morphological trait;Culm leaf	chr01	29040654	29046960	6306	68129	844
chr01	29257409	29262500	Os01g0670800	OsETT2;Resistance or Tolerance;Panicle flower	chr01	29253267	29262104	8837	68490	4695
chr01	29662506	29676795	Os01g0678500	Ostpc1;Morphological trait;Dwarf	chr01	29664500	29664652	152	69432	152
chr01	29678076	29680191	Os01g0678600	ASL1;Physiological trait;Source activity	chr01	29678572	29678818	246	69455	246
chr01	29854693	29858776	Os01g0682001	nadh-gogat1;Morphological trait;Dwarf	chr01	29857236	29857247	11	69826	11
chr01	30086646	30089163	Os01g0686800	OsRACK1A;Physiological trait;Seed	chr01	30083411	30090719	7308	70114	2517
chr01	30203733	30214833	Os01g0689451	OsHRZ1;Resistance or Tolerance;Other soil stress tolerance	chr01	30203780	30203825	45	70242	45
chr01	30922266	30926206	Os01g0703600	spl28*;Morphological trait;Culm leaf	chr01	30922572	30922616	44	71916	44
chr01	30944695	30946783	Os01g0704100	OsNRT2.3a;Resistance or Tolerance;Other soil stress tolerance	chr01	30944660	30945125	465	71932	430
chr01	31721157	31725019	Os01g0719100	OsRZFP34;Physiological trait;Culm leaf	chr01	31721432	31721467	35	73389	35
chr01	32981304	32984412	Os01g0746400	d10;Morphological trait;Culm leaf	chr01	32981726	32981800	74	76395	74
chr01	33123116	33125245	Os01g0749200	WLP1;Morphological trait;Culm leaf	chr01	33100662	33141912	41250	76679	2129
chr01	33164978	33166582	Os01g0750100	OsWRKY13;Resistance or Tolerance;Bacterial blight resistance	chr01	33165283	33165737	454	76713	454
chr01	33178792	33184516	Os01g0750300	Bc7(t);Morphological trait;Culm leaf	chr01	33182396	33182411	15	76811	15
chr01	33280010	33283023	Os01g0751600	this1;Morphological trait;Culm leaf	chr01	33280162	33280193	31	77185	31
chr01	33550951	33553486	Os01g0757200	GA2ox3;Morphological trait;Dwarf	chr01	33531847	33589875	58028	77752	2535
chr01	33699375	33704426	Os01g0759400	OsCIPK12;Resistance or Tolerance;Drought tolerance	chr01	33702065	33702080	15	77928	15
chr01	33754723	33759536	Os01g0760600	OsAAT2;Physiological trait;Eating quality	chr01	33754704	33754732	28	78178	9
chr01	33832578	33834589	Os01g0762500	glu4a;Physiological trait;Eating quality	chr01	33834074	33834094	20	78330	20
chr01	33977224	33980967	Os01g0764800	GH3-2;Resistance or Tolerance;Bacterial blight resistance	chr01	33977587	33977613	26	78478	26
chr01	34604130	34608385	Os01g0776600	OsPAP10a;Resistance or Tolerance;Other soil stress tolerance	chr01	34604308	34604321	13	79792	13
chr01	34649248	34655629	Os01g0777300	OsExo1;Others;Others	chr01	34650992	34651006	14	79833	14
chr01	35209281	35215925	Os01g0788400	PME1;Physiological trait;Source activity	chr01	35211848	35211865	17	80634	17
chr01	35447657	35452194	Os01g0795400	Hwi2;Resistance or Tolerance;Others	chr01	35443787	35453587	9800	80933	4537
chr01	36264299	36268623	Os01g0812000	gamyb;Physiological trait;Sterility	chr01	36265128	36265780	652	82059	652
chr01	37878633	37884288	Os01g0841500	OsMYB3R-2;Resistance or Tolerance;Cold tolerance	chr01	37880330	37880343	13	83941	13
chr01	38201228	38203575	Os01g0848400	qSH1;Morphological trait;Panicle flower	chr01	38203222	38203240	18	84266	18
chr01	38502654	38506809	Os01g0853400	OsCOI1;Resistance or Tolerance;Insect resistance	chr01	38504828	38504961	133	84707	133
chr01	39419964	39423182	Os01g0869200	OsMGT1;Resistance or Tolerance;Other soil stress tolerance	chr01	39419420	39420311	891	86265	347
chr01	39470704	39476499	Os01g0870100	Os-pollux;Resistance or Tolerance;Other soil stress tolerance	chr01	39474809	39476036	1227	86432	1227
chr01	40138232	40141316	Os01g0883800	sd1;Morphological trait;Dwarf	chr01	40138554	40138570	16	87998	16
chr01	40769670	40773798	Os01g0897700	OsFH1;Morphological trait;Root	chr01	40772662	40779306	6644	89698	1136
chr01	41249020	41255785	Os01g0907400	JMJ705;Resistance or Tolerance;Bacterial blight resistance	chr01	41251075	41251087	12	90531	12
chr01	41257177	41258774	Os01g0907600	OsSAG12-1;Physiological trait;Source activity	chr01	41257681	41260414	2733	90539	1093
chr01	41279485	41283041	Os01g0907900	lhd2;Morphological trait;Culm leaf	chr01	41281949	41282461	512	90584	512
chr01	41344121	41347086	Os01g0909100	HDT702;Morphological trait;Culm leaf	chr01	41345567	41345606	39	90736	39
chr01	41351529	41360199	Os01g0909200	OsDCL3a;Morphological trait;Culm leaf	chr01	41352558	41352580	22	90745	22
chr01	41351529	41362074	Os01g0909200	OsDCL1;Morphological trait;Shoot seedling	chr01	41352558	41352580	22	90745	22
chr01	41703961	41707951	Os01g0916400	OsSBP;Resistance or Tolerance;Bacterial blight resistance	chr01	41705272	41705353	81	91265	81
chr01	41761914	41766771	Os01g0917400	C3H12;Resistance or Tolerance;Bacterial blight resistance	chr01	41763535	41763685	150	91375	150
chr01	41849560	41852830	Os01g0919100	OsFRDL4;Resistance or Tolerance;Other soil stress tolerance	chr01	41850717	41850736	19	91514	19
chr01	41861510	41862442	Os01g0919400	OsSPS1;Physiological trait;Panicle flower	chr01	41862127	41862139	12	91543	12
chr01	41902665	41906463	Os01g0919900	OsSSI2;Morphological trait;Culm leaf	chr01	41903111	41904072	961	91580	961
chr01	41976946	41984958	Os01g0921200	OsMOGS;Morphological trait;Root	chr01	41978486	41978547	61	91784	61
chr01	42139221	42159209	Os01g0922800	OsMADS51;Physiological trait;Flowering	chr01	42144787	42144876	89	92135	89
chr01	42427937	42430956	Os01g0926700	OsIRX10;Morphological trait;Culm leaf	chr01	42428775	42428919	144	92542	144
chr01	42449035	42459242	Os01g0927000	SDG714;Morphological trait;Culm leaf	chr01	42456097	42456558	461	92571	461
chr01	42509061	42512026	Os01g0928000	OrbHLH001;Resistance or Tolerance;Salinity tolerance	chr01	42511203	42511252	49	92652	49
chr01	42592739	42593372	Os01g0929600	rtS;Physiological trait;Sterility	chr01	42592499	42593427	928	92816	633
chr02	80699	82952	Os02g0101500	OsHPR1;Physiological trait;Others	chr02	80939	80955	16	94726	16
chr02	554579	556320	Os02g0110200	OsHPL3;Others;Others	chr02	539962	560927	20965	95372	1741
chr02	1080513	1084821	Os02g0120800	OsRacB;Resistance or Tolerance;Blast resistance	chr02	1082951	1082979	28	96064	28
chr02	1090428	1095969	Os02g0121000	cde1(t);Morphological trait;Dwarf	chr02	1094817	1095466	649	96145	649
chr02	1658576	1662644	Os02g0131800	nrat1;Resistance or Tolerance;Other soil stress tolerance	chr02	1660892	1660904	12	97240	12
chr02	1659211	1660892	Os02g0131800	Nrat1;Resistance or Tolerance;Other stress resistance	chr02	1521508	1831384	309876	97133	1681
chr02	2073173	2075673	Os02g0138900	OsCAX4;Resistance or Tolerance;Salinity tolerance	chr02	2044437	2074737	30300	97686	1564
chr02	2230672	2239525	Os02g0141300	CAP1;Physiological trait;Sterility	chr02	2233575	2233604	29	98052	29
chr02	2875587	2882175	Os02g0152500	OsVIL2;Physiological trait;Flowering	chr02	2875641	2875673	32	99278	32
chr02	2876557	2882175	Os02g0152500	lc2;Morphological trait;Culm leaf	chr02	2879823	2879835	12	99280	12
chr02	2978853	2982354	Os02g0154200	LRK1;Morphological trait;Culm leaf	chr02	2974559	2981627	7068	99732	2774
chr02	3659296	3669320	Os02g0167700	Oscand1;Morphological trait;Root	chr02	3667255	3667266	11	100659	11
chr02	4280496	4285927	Os02g0177600	Os4CL3;Morphological trait;Dwarf	chr02	4283702	4283729	27	101266	27
chr02	4355042	4362385	Os02g0178800	osgl1-2;Morphological trait;Culm leaf	chr02	4355429	4355462	33	101347	33
chr02	4870148	4873149	Os02g0187800	OsCAD2;Morphological trait;Culm leaf	chr02	4871197	4871241	44	102488	44
chr02	4870148	4874035	Os02g0187800	gh2;Morphological trait;Culm leaf	chr02	4871197	4871241	44	102488	44
chr02	5028608	5029713	Os02g0190600	b-OsLCY;Physiological trait;Germination dormancy	chr02	5028828	5028840	12	102834	12
chr02	5706908	5709080	Os02g0202200	SPK2(SYG2);Physiological trait;Others	chr02	5682044	5951101	269057	103914	2172
chr02	5863278	5865569	Os02g0204700	CYP734A2;Morphological trait;Dwarf	chr02	5863278	5863288	10	104360	10
chr02	6426332	6428266	Os02g0214300	tms5;Physiological trait;Sterility	chr02	6426855	6426885	30	106211	30
chr02	6453555	6459620	Os02g0214900	HDA703;Morphological trait;Panicle flower	chr02	6456537	6456582	45	106282	45
chr02	6476078	6482167	Os02g0215200	HDA710;Morphological trait;Culm leaf	chr02	6478058	6478068	10	106317	10
chr02	6734753	6736433	Os02g0220400	Cga1;Morphological trait;Culm leaf	chr02	6736143	6753030	16887	106997	290
chr02	7740096	7744744	Os02g0236100	Docs1;Morphological trait;Root	chr02	7737076	7741075	3999	110685	979
chr02	8144222	8150650	Os02g0244100	GW2;Morphological trait;Seed	chr02	8146667	8146679	12	111720	12
chr02	8619286	8622771	Os02g0252400	RPBF;Physiological trait;Eating quality	chr02	8621071	8621300	229	113048	229
chr02	8789018	8795267	Os02g0255100	DCW11;Physiological trait;Sterility	chr02	8786702	8793570	6868	113412	4552
chr02	8871946	8873247	Os02g0256200	OsHARP;Morphological trait;Dwarf	chr02	8625573	9035228	409655	113056	1301
chr02	9071132	9075127	Os02g0260200	ep3;Morphological trait;Panicle flower	chr02	9073942	9081021	7079	114019	1185
chr02	10023090	10027201	Os02g0274000	Rf2;Physiological trait;Sterility	chr02	10019673	10033467	13794	116152	4111
chr02	10103579	10110496	Os02g0274900	OsGMST1;Resistance or Tolerance;Salinity tolerance	chr02	10104727	10104748	21	116541	21
chr02	10302717	10312725	Os02g0278700	oscps1;Morphological trait;Dwarf	chr02	10306005	10306553	548	117157	548
chr02	10532047	10537539	Os02g0282000	TDR (ms-IR36);Morphological trait;Sterility	chr02	10527934	10534279	6345	117676	2232
chr02	12394554	12404176	Os02g0313400	api5;Physiological trait;Sterility	chr02	12394407	12394806	399	121255	252
chr02	16300357	16301582	Os02g0462800	OsWRKY42;Morphological trait;Culm leaf	chr02	16300601	16300613	12	126709	12
chr02	19418357	19420749	Os02g0516400	cfl1;Morphological trait;Culm leaf	chr02	19414035	19419518	5483	132128	1161
chr02	19956716	19963395	Os02g0523500	OsTudor-SN;Physiological trait;Eating quality	chr02	19959039	19959050	11	133021	11
chr02	20182343	20189818	Os02g0527600	OsCTR2;Morphological trait;Culm leaf	chr02	20186740	20186791	51	134081	51
chr02	20213673	20216088	Os02g0528200	BE2b;Physiological trait;Source activity	chr02	20203407	20217272	13865	134089	2415
chr02	20424908	20426830	Os02g0531600	RCN2;Morphological trait;Panicle flower	chr02	20424073	20425111	1038	134520	203
chr02	20425487	20426830	Os02g0531600	DP2;Morphological trait;Panicle flower	chr02	20425653	20448721	23068	134521	1177
chr02	21023450	21024511	Os02g0543000	ASR3;Resistance or Tolerance;Cold tolerance	chr02	21023377	21023926	549	136111	476
chr02	21726180	21729939	Os02g0553200	OsAPX8;Physiological trait;Source activity	chr02	21690531	21740397	49866	137509	3759
chr02	22107945	22118231	Os02g0559800	EL5;Morphological trait;Root	chr02	22108189	22108209	20	138605	20
chr02	22126250	22127194	Os02g0560200	EL5;Morphological trait;Root	chr02	22120085	22131754	11669	138634	944
chr02	22135276	22136220	Os02g0560600	EL5;Morphological trait;Root	chr02	22136095	22136105	10	138639	10
chr02	22466026	22471133	Os02g0568200	cpt1;Morphological trait;Root	chr02	22467265	22467275	10	139466	10
chr02	22834405	22838152	Os02g0573200	cry1a;Morphological trait;Shoot seedling	chr02	22834836	22834848	12	140453	12
chr02	23191143	23195537	Os02g0580300	GF14e;Resistance or Tolerance;Bacterial blight resistance	chr02	23194495	23207519	13024	141087	1042
chr02	23979002	23981010	Os02g0595900	OsNAR2.1;Resistance or Tolerance;Other stress resistance	chr02	23978067	23979381	1314	143340	379
chr02	24603691	24606812	Os02g0606000	OsDG2;Morphological trait;Culm leaf	chr02	24606653	24606670	17	146926	17
chr02	24627261	24630654	Os02g0606700	rss1;Resistance or Tolerance;Salinity tolerance	chr02	24627902	24627934	32	147125	32
chr02	24957939	24961346	Os02g0612300	du3;Physiological trait;Eating quality	chr02	24959091	24959116	25	148041	25
chr02	25376202	25382207	Os02g0617500	mer3;Physiological trait;Sterility	chr02	25380151	25380537	386	149568	386
chr02	25624670	25630611	Os02g0622100	hbd2;Physiological trait;Lethality	chr02	25625875	25626597	722	150288	722
chr02	25624787	25630611	Os02g0622100	LTG1;Morphological trait;Culm leaf	chr02	25625875	25626597	722	150288	722
chr02	25802722	25808944	Os02g0625000	Oscry2;Morphological trait;Shoot seedling	chr02	25803941	25803960	19	150597	19
chr02	26086366	26090603	Os02g0630300	GA2ox9;Morphological trait;Dwarf	chr02	26087923	26087954	31	151185	31
chr02	26610817	26612941	Os02g0640500	SIT1;Resistance or Tolerance;Salinity tolerance	chr02	26610831	26610842	11	152253	11
chr02	26777305	26787779	Os02g0644000	OsaLeg2;Others;Others	chr02	26777015	26778273	1258	152452	968
chr02	27654468	27658494	Os02g0661100	OsTPP1;Resistance or Tolerance;Cold tolerance	chr02	27655140	27655155	15	153236	15
chr02	27816576	27819264	Os02g0664000	OsGPX3;Morphological trait;Dwarf	chr02	27815955	27827629	11674	153374	2688
chr02	27931202	27934242	Os02g0666200	OsPIP1;1;Physiological trait;Germination dormancy	chr02	27931677	27931687	10	153516	10
chr02	28135691	28138331	Os02g0671100	MAIF1;Morphological trait;Root	chr02	28085654	28292769	207115	153754	2640
chr02	28374727	28379045	Os02g0674800	Roc5(rl(t));Morphological trait;Culm leaf	chr02	28378920	28378932	12	154120	12
chr02	28374727	28381774	Os02g0674800	oul1;Morphological trait;Culm leaf	chr02	28378920	28378932	12	154120	12
chr02	28762840	28770807	Os02g0682200	mfo1;Morphological trait;Panicle flower	chr02	28765251	28765287	36	154744	36
chr02	30228115	30244751	Os02g0709400	adl1;Morphological trait;Culm leaf	chr02	30234562	30234583	21	157368	21
chr02	30612181	30617216	Os02g0716500	OsFAD2;Resistance or Tolerance;Cold tolerance	chr02	30607013	30617042	10029	158092	4861
chr02	30878647	30885234	Os02g0722400	OsAAT24;Physiological trait;Source activity	chr02	30881896	30881923	27	158301	27
chr02	31051161	31052302	Os02g0725700	OsHAP3E;Morphological trait;Culm leaf	chr02	31051998	31052031	33	158439	33
chr02	31343527	31349620	Os02g0731200	OsMADS57;Morphological trait;Culm leaf	chr02	31343598	31343613	15	158748	15
chr02	31561641	31565520	Os02g0735200	Osgs1;1;Morphological trait;Dwarf	chr02	31551200	31564326	13126	158916	2685
chr02	31632631	31636232	Os02g0736400	OsDHODH1;Resistance or Tolerance;Drought tolerance	chr02	31630816	31634214	3398	158956	1583
chr02	32045781	32048923	Os02g0743400	OsPIN1;Morphological trait;Culm leaf	chr02	32029820	32180099	150279	159567	3142
chr02	32058836	32066940	Os02g0743500	dsm1;Resistance or Tolerance;Drought tolerance	chr02	32029820	32180099	150279	159567	8104
chr02	32133086	32135662	Os02g0744900	LYL1;Physiological trait;Source activity	chr02	32135051	32135071	20	159655	20
chr02	32153189	32156796	Os02g0745100	lsi1;Resistance or Tolerance;Insect resistance	chr02	32154635	32154647	12	159664	12
chr02	32738324	32739505	Os02g0757100	OsPHI-1;Morphological trait;Culm leaf	chr02	32636896	33030555	393659	160643	1181
chr02	32882191	32884557	Os02g0759800	OsSKIPa;Resistance or Tolerance;Drought tolerance	chr02	32636896	33030555	393659	160643	2366
chr02	32925763	32931706	Os02g0761000	OsMADS22;Morphological trait;Culm leaf	chr02	32928111	32929386	1275	160992	1275
chr02	32925796	32931701	Os02g0761000	OsMADS22;Morphological trait;Panicle flower	chr02	32928111	32929386	1275	160992	1275
chr02	32998172	32999809	Os02g0762400	Orysa;KRP1;Morphological trait;Seed	chr02	32636896	33030555	393659	160643	1637
chr02	33005871	33007658	Os02g0762600	SGL1;Morphological trait;Culm leaf	chr02	33007400	33007411	11	161049	11
chr02	33135140	33137038	Os02g0765600	Amy1A;Physiological trait;Eating quality	chr02	33136465	33136533	68	161254	68
chr02	33135190	33137035	Os02g0765600	AmyI-1;Morphological trait;Shoot seedling	chr02	33136465	33136533	68	161254	68
chr02	33414939	33420444	Os02g0771100	pps;Morphological trait;Dwarf	chr02	33418713	33418729	16	161575	16
chr02	33575560	33579991	Os02g0774300	mtHsp70;Resistance or Tolerance;Other stress resistance	chr02	33577624	33577650	26	161802	26
chr02	34741088	34743908	Os02g0796300	OsCAF1H;Resistance or Tolerance;Other stress resistance	chr02	34740134	34743483	3349	163927	2395
chr02	34828885	34833249	Os02g0797500	OsAAT1;Physiological trait;Eating quality	chr02	34833027	34833039	12	164314	12
chr02	34917690	34921218	Os02g0799100	Ossgo1;Physiological trait;Sterility	chr02	34919539	34919563	24	164508	24
chr02	35174734	35174874	osa-MIR396c	osa-MIR396c;Resistance or Tolerance;Other stress resistance	chr02	35106977	35583051	476074	164735	140
chr02	35496326	35501884	Os02g0809800	Ospho1;2;Resistance or Tolerance;Other soil stress tolerance	chr02	35494846	35500987	6141	165524	4661
chr02	35560221	35562582	Os02g0810900	NAC32;Resistance or Tolerance;Salinity tolerance	chr02	35106977	35583051	476074	164735	2361
chr02	35574485	35575779	Os02g0811000	th1;Morphological trait;Panicle flower	chr02	35106977	35583051	476074	164735	1294
chr02	35574485	35576584	Os02g0811000	bls1;Morphological trait;Panicle flower	chr02	35106977	35583051	476074	164735	2099
chr02	35913069	35927326	Os02g0816900	osmyoXIB;Physiological trait;Sterility	chr02	35916484	35916494	10	166161	10
chr03	67390	77636	Os03g0100800	Osa8;Resistance or Tolerance;Other soil stress tolerance	chr03	19040	275227	256187	166202	10246
chr03	198743	199200	Os03g0103300	qLTG3?1;Physiological trait;Germination dormancy	chr03	19040	275227	256187	166202	457
chr03	610981	614719	Os03g0110800	osdrm2;Others;Others	chr03	614294	614310	16	166926	16
chr03	696186	698721	Os03g0112700	Ehd4;Physiological trait;Flowering	chr03	688520	697694	9174	166999	1508
chr03	1067800	1071757	Os03g0119966	rim1;Resistance or Tolerance;Other disease resistance	chr03	1068472	1068509	37	167612	37
chr03	1248667	1278620	Os03g0122600	dth3;Physiological trait;Flowering	chr03	1249200	1249537	337	168048	337
chr03	1305760	1309549	Os03g0123300	te;Morphological trait;Culm leaf	chr03	1307803	1307867	64	168300	64
chr03	1603441	1607872	Os03g0128700	OsCDPK1;Morphological trait;Seed	chr03	1603060	1603504	444	168755	63
chr03	1603443	1607872	Os03g0128700	CDPK13;Resistance or Tolerance;Cold tolerance	chr03	1603060	1603504	444	168755	61
chr03	1857242	1860045	Os03g0133400	CEBiP;Resistance or Tolerance;Blast resistance	chr03	1858275	1858319	44	169498	44
chr03	1857247	1860045	Os03g0133400	CEBiP;Resistance or Tolerance;Blast resistance	chr03	1858275	1858319	44	169498	44
chr03	2705032	2705895	Os03g0149100	arl1;Morphological trait;Root	chr03	2704669	2705518	849	170613	486
chr03	3179681	3186612	Os03g0160100	OsACDR1;Resistance or Tolerance;Blast resistance	chr03	3180835	3180974	139	171396	139
chr03	3632045	3635508	Os03g0167600	dpw;Physiological trait;Sterility	chr03	3635126	3635149	23	172599	23
chr03	3776031	3782468	Os03g0170900	OsSUT1;Morphological trait;Dwarf	chr03	3776878	3776891	13	172858	13
chr03	3776034	3781505	Os03g0170900	OsSUT1;Resistance or Tolerance;Insect resistance	chr03	3776878	3776891	13	172858	13
chr03	4210340	4211374	Os03g0180800	OsTIFY11a;Resistance or Tolerance;Drought tolerance	chr03	4210323	4210355	32	173696	15
chr03	4227220	4228321	Os03g0181100	TIFY11b;Morphological trait;Dwarf	chr03	4164515	4633794	469279	173677	1101
chr03	4245314	4250117	Os03g0181500	oni1;Morphological trait;Shoot seedling	chr03	4243963	4247962	3999	173730	2648
chr03	4334965	4341555	Os03g0183100	OsBP-73;Morphological trait;Dwarf	chr03	4164515	4633794	469279	173677	6590
chr03	4388489	4393138	Os03g0184000	OsPDS;Physiological trait;Germination dormancy	chr03	4390622	4390633	11	173851	11
chr03	4497741	4504095	Os03g0186600	OsMDP1;Morphological trait;Culm leaf	chr03	4503087	4503101	14	173947	14
chr03	4804030	4808013	Os03g0192700	RINO1;Physiological trait;Eating quality	chr03	4806910	4807160	250	174312	250
chr03	6068424	6075696	Os03g0215200	dl;Morphological trait;Culm leaf	chr03	6069956	6069966	10	177022	10
chr03	6080181	6088701	Os03g0215400	OsMADS1;Morphological trait;Panicle flower	chr03	6083876	6083906	30	177033	30
chr03	6080198	6088701	Os03g0215400	lhs1;Morphological trait;Panicle flower	chr03	6083876	6083906	30	177033	30
chr03	6485246	6490063	Os03g0223400	GS1;2;Physiological trait;Source activity	chr03	6488327	6488398	71	177618	71
chr03	6849565	6853292	Os03g0228800	OsBRR1;Resistance or Tolerance;Blast resistance	chr03	6851898	6851911	13	178091	13
chr03	7078498	7080936	Os03g0232600	TUD1;Morphological trait;Culm leaf	chr03	7080613	7080627	14	178270	14
chr03	7261911	7270354	Os03g0236966	Osapc6;Morphological trait;Dwarf	chr03	7262017	7262033	16	178524	16
chr03	7628772	7633071	Os03g0243300	RPN10;Resistance or Tolerance;Other soil stress tolerance	chr03	7617404	7747898	130494	178887	4299
chr03	8488024	8492614	Os03g0260100	NYC4;Physiological trait;Source activity	chr03	8490756	8490790	34	180543	34
chr03	8680451	8685823	Os03g0262900	glup6;Physiological trait;Eating quality	chr03	8682857	8682872	15	180703	15
chr03	9183459	9187361	Os03g0272300	OsSDIR1;Resistance or Tolerance;Drought tolerance	chr03	9181278	9187597	6319	181140	3902
chr03	10130997	10133342	Os03g0290300	OsFAD7;Resistance or Tolerance;Blast resistance	chr03	10131872	10132213	341	183099	341
chr03	10338564	10342193	Os03g0294700	OsETOL1;Physiological trait;Others	chr03	10339883	10339898	15	183396	15
chr03	10734978	10739431	Os03g0302900	ssd1;Morphological trait;Dwarf	chr03	10738734	10745778	7044	184389	697
chr03	11070815	11078848	Os03g0309200	phyB;Morphological trait;Culm leaf	chr03	11076236	11076274	38	185012	38
chr03	11376742	11378885	Os03g0315400	OsMYB2;Resistance or Tolerance;Cold tolerance	chr03	11377407	11377417	10	185564	10
chr03	11573337	11575120	Os03g0319300	OsCam1-1;Resistance or Tolerance;Salinity tolerance	chr03	11260361	11721362	461001	185405	1783
chr03	11576936	11582632	Os03g0319400	OsCIPK03;Resistance or Tolerance;Cold tolerance	chr03	11578931	11578963	32	186098	32
chr03	11646117	11649720	Os03g0320900	v2;Physiological trait;Source activity	chr03	11647405	11647429	24	186132	24
chr03	11701554	11702807	Os03g0321700	OsWRKY31;Morphological trait;Root	chr03	11701886	11707334	5448	186195	921
chr03	11762832	11770250	Os03g0323200	OschlH;Physiological trait;Source activity	chr03	11765506	11765520	14	186393	14
chr03	11820061	11829617	Os03g0324300	OsEIL1;Morphological trait;Dwarf	chr03	11829576	11830041	465	186435	41
chr03	14473780	14474766	Os03g0358900	OsIPT1;Morphological trait;Culm leaf	chr03	14473975	14474001	26	191910	26
chr03	15077163	15081835	Os03g0370000	pdhk;Morphological trait;Panicle flower	chr03	15079919	15079931	12	193268	12
chr03	15477373	15481352	Os03g0377700	CESA5;Morphological trait;Dwarf	chr03	15478197	15478212	15	194759	15
chr03	15551019	15553161	Os03g0379300	OsIRO3;Resistance or Tolerance;Other soil stress tolerance	chr03	15552018	15552078	60	194833	60
chr03	16475031	16477859	Os03g0395000	OsHO2;Morphological trait;Culm leaf	chr03	16475191	16475204	13	197487	13
chr03	17365462	17371070	Os03g0407400	GS3;Morphological trait;Panicle flower	chr03	17367702	17373704	6002	199898	3368
chr03	17630229	17633682	Os03g0411500	vyl;Physiological trait;Source activity	chr03	17625874	17633840	7966	200523	3453
chr03	19121639	19122996	Os03g0438100	OsAOC;Resistance or Tolerance;Blast resistance	chr03	19122241	19122256	15	202839	15
chr03	19879867	19884462	Os03g0449200	OsAGO7;Morphological trait;Culm leaf	chr03	19881424	19884652	3228	204387	3038
chr03	21007827	21010153	Os03g0563300	chl9;Physiological trait;Source activity	chr03	21008096	21008146	50	205777	50
chr03	21553344	21560048	Os03g0571900	pez1;Resistance or Tolerance;Other soil stress tolerance	chr03	21553838	21553852	14	207289	14
chr03	23298503	23302596	Os03g0602300	brd1;Morphological trait;Dwarf	chr03	23302368	23302423	55	210547	55
chr03	23299230	23301098	Os03g0602300	CYP85A1;Morphological trait;Shoot seedling	chr03	23270037	23305717	35680	210467	1868
chr03	24959201	24962318	Os03g0633500	OsIAA11;Morphological trait;Root	chr03	24961284	24961297	13	213521	13
chr03	25461365	25467030	Os03g0641300	GRP162;Physiological trait;Sterility	chr03	25461520	25461533	13	214284	13
chr03	25957361	25967261	Os03g0650000	OsSh1;Morphological trait;Panicle flower	chr03	25966788	25966854	66	214915	66
chr03	25994338	26000523	Os03g0650400	Osam1;Physiological trait;Sterility	chr03	25997970	25998467	497	215007	497
chr03	26280583	26285646	Os03g0654600	nol1;Physiological trait;Source activity	chr03	26280426	26280635	209	215353	52
chr03	26387406	26391441	Os03g0656900	v1;Resistance or Tolerance;Cold tolerance	chr03	26388242	26388258	16	215515	16
chr03	26962650	26968135	Os03g0666100	crl4;Morphological trait;Root	chr03	26966160	26966217	57	217176	57
chr03	26968125	26972105	Os03g0666200	OsSWAP70A;Resistance or Tolerance;Blast resistance	chr03	26968217	26984159	15942	217174	3888
chr03	28535769	28538856	Os03g0693600	OsIAGLU;Morphological trait;Culm leaf	chr03	28536486	28536522	36	219831	36
chr03	28539529	28540525	Os03g0693700	Osoxo4;Resistance or Tolerance;Sheath blight resistance	chr03	28539552	28539859	307	219868	307
chr03	28867333	28873730	Os03g0700700	OsLOX1;Resistance or Tolerance;Insect resistance	chr03	28867229	28867536	307	220205	203
chr03	28941973	28946534	Os03g0701800	OsPIPK1;Physiological trait;Flowering	chr03	28928272	28943646	15374	220513	1673
chr03	29273183	29275515	Os03g0707600	Slr1-d;Morphological trait;Dwarf	chr03	29274800	29274838	38	221207	38
chr03	30288045	30290829	Os03g0726100	rip-3 (a-tubulin);Physiological trait;Panicle flower	chr03	30280720	30293613	12893	222629	2784
chr03	30358195	30367713	Os03g0727000	OSH1;Morphological trait;Culm leaf	chr03	30358841	30358864	23	222676	23
chr03	30586607	30588974	Os03g0729500	OsGRF6;Morphological trait;Panicle flower	chr03	30587459	30587469	10	222911	10
chr03	30978572	30986762	LOC_Os03g52700	OsHOS1;Resistance or Tolerance;Cold tolerance	chr03	30981150	30981171	21	223320	21
chr03	31170066	31172297	Os03g0741100	OsbHLH148;Resistance or Tolerance;Drought tolerance	chr03	31170494	31170508	14	223577	14
chr03	31442841	31452381	Os03g0746500	OsSUV3;Resistance or Tolerance;Drought tolerance	chr03	31447316	31447523	207	223922	207
chr03	31773181	31776890	Os03g0752200	OsSPO11-1;Physiological trait;Sterility	chr03	31775053	31775126	73	224378	73
chr03	31794870	31804719	Os03g0752800	MADS14;Morphological trait;Panicle flower	chr03	31795586	31795598	12	224390	12
chr03	31811507	31817316	Os03g0756100	OsMADS34;Morphological trait;Panicle flower	chr03	31809230	31821883	12653	224410	5809
chr03	31811507	31818173	Os03g0753100	osmads34;Morphological trait;Panicle flower	chr03	31809230	31821883	12653	224410	6666
chr03	32182719	32189711	Os03g0758100	pho1;Morphological trait;Seed	chr03	32187760	32187775	15	225105	15
chr03	32576667	32583750	Os03g0766000	CysR10;Physiological trait;Eating quality	chr03	32580796	32580818	22	225899	22
chr03	32815278	32820957	Os03g0771500	OSH43;Morphological trait;Culm leaf	chr03	32816018	32816047	29	226600	29
chr03	32914947	32921800	Os03g0773600	NRRa;Physiological trait;Flowering	chr03	32918155	32918169	14	226759	14
chr03	33283246	33286534	Os03g0782500	OsPIL1;Morphological trait;Dwarf	chr03	33285174	33285197	23	227293	23
chr03	33710350	33719780	Os03g0790600	pla3/gp;Morphological trait;Dwarf	chr03	33716415	33716449	34	227709	34
chr03	33850197	33857593	Os03g0793500	el1;Physiological trait;Flowering	chr03	33855802	33855830	28	228044	28
chr03	34129617	34131861	Os03g0798300	MET1a;Physiological trait;Seed	chr03	34130053	34130068	15	228706	15
chr03	34748431	34748576	Os03g0809900	OsY14b;Morphological trait;Culm leaf	chr03	34743301	34754638	11337	229841	145
chr03	34806026	34812695	Os03g0811100	chl1;Physiological trait;Source activity	chr03	34807650	34807674	24	229942	24
chr03	34806181	34810722	Os03g0811100	ygl7;Morphological trait;Culm leaf	chr03	34807650	34807674	24	229942	24
chr03	35245235	35246371	Os03g0819600	gh1;Morphological trait;Culm leaf	chr03	35245134	35247068	1934	230951	1136
chr03	35274913	35275763	Os03g0820300	ZFP182;Resistance or Tolerance;Cold tolerance	chr03	35274628	35275016	388	231146	103
chr03	35282433	35284957	Os03g0820600	OsADF;Physiological trait;Germination dormancy	chr03	35284124	35284141	17	231171	17
chr03	35325430	35329103	Os03g0821300	Xb15;Resistance or Tolerance;Bacterial blight resistance	chr03	35324725	35325744	1019	231231	314
chr03	36304155	36311118	Os03g0843600	Os-castor;Resistance or Tolerance;Other soil stress tolerance	chr03	36304845	36304855	10	233253	10
chr04	112189	115776	Os04g0101800	SOR1;Morphological trait;Root	chr04	113573	113591	18	233555	18
chr04	387134	391521	Os04g0106300	OsARG;Morphological trait;Dwarf	chr04	387544	387756	212	234228	212
chr04	4397539	4410642	Os04g0164900	sug1;Physiological trait;Eating quality	chr04	4399876	4401544	1668	245521	1668
chr04	5324713	5326858	Os04g0178400	CYP99A3;Resistance or Tolerance;Other stress resistance	chr04	5326838	5330224	3386	249934	20
chr04	5477147	5479152	Os04g0180400	CYP99A2;Resistance or Tolerance;Other stress resistance	chr04	5441866	5726443	284577	250595	2005
chr04	5857555	5860557	Os04g0186800	PT13;Resistance or Tolerance;Other soil stress tolerance	chr04	5856389	5859771	3382	252111	2216
chr04	6931873	6936173	Os04g0201900	OslecRK;Physiological trait;Germination dormancy	chr04	6934902	6934932	30	254432	30
chr04	11363049	11375412	Os04g0271000	OsSrt1;Resistance or Tolerance;Other stress resistance	chr04	11371670	11377072	5402	262348	3742
chr04	13515237	13517657	Os04g0301500	RERJ1;Morphological trait;Dwarf	chr04	13517594	13517917	323	267204	63
chr04	14854740	14855566	Os04g0321500	S28;Physiological trait;Sterility	chr04	14374638	14860141	485503	268720	826
chr04	18581156	18585396	Os04g0379900	SLL1;Morphological trait;Root	chr04	18576585	18583329	6744	278511	2173
chr04	19585066	19587291	Os04g0396500	lax2;Morphological trait;Culm leaf	chr04	19585628	19585650	22	280619	22
chr04	20530934	20531875	Os04g0415000	ACL1;Morphological trait;Culm leaf	chr04	20531685	20531700	15	282599	15
chr04	22046053	22049901	Os04g0442300	OsRR1;Morphological trait;Root	chr04	22049871	22049883	12	286869	12
chr04	22728719	22731041	Os04g0447800	OsGAD2;Others;Others	chr04	22713638	22737474	23836	288062	2322
chr04	22948432	22953569	Os04g0452100	cry1b;Morphological trait;Shoot seedling	chr04	22952259	22952269	10	288488	10
chr04	22981985	22990327	Os04g0452500	zep1;Physiological trait;Sterility	chr04	22985732	22986514	782	288505	782
chr04	23265887	23271042	Os04g0457800	OsSERK1;Resistance or Tolerance;Blast resistance	chr04	23244176	23270471	26295	288729	4584
chr04	23532796	23535645	Os04g0463400	OsVIT1;Physiological trait;Eating quality	chr04	23534556	23534572	16	289004	16
chr04	23570056	23574872	Os04g0464200	OsBADH1;Physiological trait;Seed	chr04	23570693	23570703	10	289090	10
chr04	23865707	23867864	Os04g0469800	CL4 (= dwarf11);Morphological trait;Panicle flower	chr04	23740086	24010984	270898	289394	2157
chr04	23865707	23870132	Os04g0469800	d11;Morphological trait;Culm leaf	chr04	23740086	24010984	270898	289394	4425
chr04	24091114	24096437	Os04g0473800	FCP1;Morphological trait;Shoot seedling	chr04	24092779	24092789	10	290235	10
chr04	24097480	24107361	Os04g0473900	DWA1;Morphological trait;Culm leaf	chr04	24100020	24100073	53	290238	53
chr04	24194135	24196073	Os04g0475600	DAO;Morphological trait;Seed	chr04	24188860	24195486	6626	290375	1351
chr04	24284133	24286466	Os04g0477300	BET1;Resistance or Tolerance;Other soil stress tolerance	chr04	24285023	24285033	10	290473	10
chr04	24354013	24358518	Os04g0479000	CRC1;Physiological trait;Sterility	chr04	24355549	24356147	598	290619	598
chr04	25262540	25266370	Os04g0497200	OsGLU3;Morphological trait;Root	chr04	25261671	25267668	5997	291351	3830
chr04	25872631	25880013	Os04g0509300	OsDCL4;Others;Others	chr04	25872956	25878960	6004	291924	6004
chr04	26971305	26973571	Os04g0531400	SIT2;Resistance or Tolerance;Salinity tolerance	chr04	26972662	26972674	12	292614	12
chr04	27302452	27307230	Os04g0537900	OsaLeg3;Others;Others	chr04	27301585	27314588	13003	292859	4778
chr04	27522719	27524052	Os04g0541700	Oshox22;Resistance or Tolerance;Drought tolerance	chr04	27407454	27875185	467731	293057	1333
chr04	27582517	27586294	Os04g0542800	YSL16;Physiological trait;Sterility	chr04	27407454	27875185	467731	293057	3777
chr04	27966328	27968953	Os04g0550600	d17;Morphological trait;Culm leaf	chr04	27940807	28022288	81481	293530	2625
chr04	28247100	28248819	Os04g0556500	cZOGT1;Morphological trait;Dwarf	chr04	28248227	28248264	37	294020	37
chr04	28314104	28337863	Os04g0557500	OSB2;Others;Others	chr04	28317404	28317432	28	294070	28
chr04	28347891	28354147	Os04g0557800	OSB1;Others;Others	chr04	28350242	28350254	12	294092	12
chr04	28807162	28814527	Os04g0566400	OsIDD10;Morphological trait;Root	chr04	28805670	28808961	3291	294523	1799
chr04	29219354	29220013	Os04g0572400	OsDREB1E;Resistance or Tolerance;Drought tolerance	chr04	29218887	29234151	15264	295216	659
chr04	29480844	29485137	Os04g0576900	xiao;Morphological trait;Culm leaf	chr04	29484759	29484772	13	295556	13
chr04	29530385	29533185	Os04g0578000	OsACS2;Resistance or Tolerance;Blast resistance	chr04	29530540	29530550	10	295575	10
chr04	29530386	29533185	Os04g0578000	OsACS2;Resistance or Tolerance;Blast resistance	chr04	29530540	29530550	10	295575	10
chr04	29929794	29934249	Os04g0584600	OsCDPK7;Resistance or Tolerance;Drought tolerance	chr04	29926465	29938021	11556	296041	4455
chr04	29964265	29968898	Os04g0585200	glr3.1;Morphological trait;Root	chr04	29966030	29966045	15	296119	15
chr04	30581106	30584370	Os04g0598300	apo2;Morphological trait;Panicle flower	chr04	30524596	30589993	65397	297354	3264
chr04	31337819	31338487	Os04g0610400	OsAP2-39;Morphological trait;Dwarf	chr04	31334013	31340115	6102	299243	668
chr04	31360150	31363928	Os04g0610800	rlin1;Others;Others	chr04	31360580	31360594	14	299287	14
chr04	31425493	31429569	Os04g0611800	osks1;Morphological trait;Dwarf	chr04	31428042	31428059	17	299393	17
chr04	31436519	31438881	Os04g0612000	OsKS2;Morphological trait;Dwarf	chr04	31438456	31438568	112	299519	112
chr04	31468161	31472259	Os04g0612700	fc1;Morphological trait;Culm leaf	chr04	31468166	31468199	33	299852	33
chr04	31610701	31613275	Os04g0615000	GPS;Physiological trait;Source activity	chr04	31605520	31616426	10906	300117	2574
chr04	31901512	31903590	Os04g0620000	OsABCC1;Physiological trait;Seed	chr04	31902415	31902428	13	300894	13
chr04	32036638	32042984	Os04g0622600	Xa1;Resistance or Tolerance;Bacterial blight resistance	chr04	32041583	32042126	543	301178	543
chr04	33233701	33246836	Os04g0645100	flo2;Morphological trait;Seed	chr04	33231143	33244147	13004	303294	10446
chr04	34022957	34029554	Os04g0659100	GS2;Physiological trait;Source activity	chr04	34025935	34025947	12	305324	12
chr04	34604536	34606448	Os04g0670500	OsCP1;Morphological trait;Dwarf	chr04	34593293	34912018	318725	305984	1912
chr04	34629728	34631763	Os04g0670900	sh4;Morphological trait;Panicle flower	chr04	34631277	34639242	7965	306016	486
chr04	34676997	34684409	Os04g0671900	OsARF12;Morphological trait;Root	chr04	34682351	34682363	12	306119	12
chr04	34775847	34777074	Os04g0673300	OsRR6;Morphological trait;Dwarf	chr04	34593293	34912018	318725	305984	1227
chr04	34836681	34836822	Os04g0674500	OsmiR396d;Morphological trait;Panicle flower	chr04	34593293	34912018	318725	305984	141
chr04	34844521	34846683	Os04g0674700	SLAC1;Physiological trait;Source activity	chr04	34593293	34912018	318725	305984	2162
chr04	35264814	35269455	Os04g0682800	AM1;Morphological trait;Culm leaf	chr04	35268171	35268186	15	307187	15
chr05	415085	421311	Os05g0107700	Xa5;Resistance or Tolerance;Bacterial blight resistance	chr05	419928	419957	29	308513	29
chr05	617592	621358	Os05g0112000	XB3;Resistance or Tolerance;Bacterial blight resistance	chr05	618184	618259	75	309057	75
chr05	836453	839637	Os05g0115800	OsMKP1;Morphological trait;Dwarf	chr05	836687	836697	10	309734	10
chr05	854992	858604	Os05g0116100	OsDHAR1;Morphological trait;Culm leaf	chr05	857743	857762	19	309759	19
chr05	967668	969310	Os05g0119000	STAR2;Resistance or Tolerance;Other soil stress tolerance	chr05	967978	967988	10	309889	10
chr05	1134012	1138301	Os05g0121600	rsr1;Morphological trait;Seed	chr05	1133915	1136394	2479	310266	2382
chr05	1404985	1416509	Os05g0125000	siz1;Physiological trait;Sterility	chr05	1405709	1405753	44	310570	44
chr05	1702497	1708988	Os05g0129700	OSH71;Morphological trait;Culm leaf	chr05	1702738	1702750	12	311240	12
chr05	2067076	2070017	Os05g0135700	OsSAMS1;Morphological trait;Dwarf	chr05	2067174	2071543	4369	313624	2843
chr05	2289441	2293487	Os05g0140100	OsMYB2P-1 1;Morphological trait;Root	chr05	2289061	2289808	747	314145	367
chr05	2542267	2551199	Os05g0144400	OsPPKL2;Morphological trait;Seed	chr05	2544515	2544538	23	314621	23
chr05	2576593	2582363	Os05g0145000	PTB1;Physiological trait;Sterility	chr05	2579750	2584341	4591	314648	2613
chr05	2803370	2804958	Os05g0149400	OsACO5;Resistance or Tolerance;Blast resistance	chr05	2797477	2803729	6252	315028	359
chr05	3167841	3173817	Os05g0154600	APIP6;Resistance or Tolerance;Blast resistance	chr05	3172760	3172803	43	315995	43
chr05	3181088	3188229	Os05g0154700	srs3;Morphological trait;Seed	chr05	3181356	3181391	35	316014	35
chr05	3417351	3421816	Os05g0158500	GS5;Morphological trait;Seed	chr05	3363511	3426994	63483	316830	4465
chr05	4174663	4179835	Os05g0170000	bc10;Morphological trait;Culm leaf	chr05	4175135	4175150	15	319787	15
chr05	4580364	4587714	Os05g0176800	OsBOR4;Physiological trait;Sterility	chr05	4584311	4584333	22	320488	22
chr05	5342000	5344000	AB433345_DQ991205	qSW5;Morphological trait;Seed	chr05	5343582	5343804	222	321968	222
chr05	5342000	5344000	DQ991205	GW5;Morphological trait;Seed	chr05	5343582	5343804	222	321968	222
chr05	5828100	5830243	Os05g0195200	OsTZF1;Resistance or Tolerance;Drought tolerance	chr05	5828600	5828622	22	322854	22
chr05	5922197	5928910	Os05g0196500	JMJ703;Morphological trait;Culm leaf	chr05	5923075	5923088	13	322995	13
chr05	6428942	6440158	Os05g0203800	mads58;Morphological trait;Panicle flower	chr05	6430565	6430605	40	324248	40
chr05	7016382	7018795	Os05g0213500	OsPYL/RCAR5;Morphological trait;Dwarf	chr05	7018674	7019175	501	325521	121
chr05	7732694	7734208	Os05g0226900	RePRP1.1;Morphological trait;Root	chr05	7732459	7743618	11159	326871	1514
chr05	8857725	8859663	Os05g0245300	OsBLE3;Morphological trait;Culm leaf	chr05	8574688	8993467	418779	328481	1938
chr05	8913591	8914852	Os05g0247100	OsHI-XIP;Resistance or Tolerance;Other stress resistance	chr05	8913903	8913942	39	329323	39
chr05	11404176	11405956	Os05g0276500	OsEXPA3;Morphological trait;Others	chr05	11271914	11508086	236172	332586	1780
chr05	14969392	14970192	Os05g0322900	WRKY45;Resistance or Tolerance;Blast resistance	chr05	14969822	14978557	8735	337874	370
chr05	14969392	14971537	Os05g0322900	OsWRKY45;Resistance or Tolerance;Blast resistance	chr05	14969822	14978557	8735	337874	1715
chr05	14969392	14971539	Os05g0322900	OsWRKY45;Resistance or Tolerance;Bacterial blight resistance	chr05	14969822	14978557	8735	337874	1717
chr05	15587381	15591400	Os05g0333200	d1;Morphological trait;Dwarf	chr05	15587269	15621110	33841	339655	4019
chr05	15587656	15591295	Os05g0333200	d89;Morphological trait;Culm leaf	chr05	15587269	15621110	33841	339655	3639
chr05	16128079	16130446	Os05g0343400	OsWRKY53;Resistance or Tolerance;Blast resistance	chr05	16126028	16142890	16862	340590	2367
chr05	16274887	16278198	Os05g0346200	OsDREB2B;Resistance or Tolerance;Drought tolerance	chr05	16276518	16276540	22	340885	22
chr05	16489882	16495661	Os05g0349700	ygl1;Physiological trait;Source activity	chr05	16491918	16491928	10	341289	10
chr05	16674603	16679390	Os05g0353400	OsImpβ1;Physiological trait;Sterility	chr05	16676004	16676310	306	341931	306
chr05	17519574	17524747	Os05g0365300	DEPG1;Resistance or Tolerance;Bacterial blight resistance	chr05	17518413	17519639	1226	343502	65
chr05	18820402	18824497	Os05g0389000	smos1;Morphological trait;Others	chr05	18822371	18822384	13	346617	13
chr05	19725321	19744514	Os05g0405000	flo4;Physiological trait;Eating quality	chr05	19729088	19729108	20	348710	20
chr05	19875232	19878096	Os05g0407500	sdg;Morphological trait;Dwarf	chr05	19878089	19878106	17	348935	7
chr05	19875298	19878096	Os05g0407500	gid1;Morphological trait;Dwarf	chr05	19878089	19878106	17	348935	7
chr05	20766299	20768638	Os05g0423400	OsMADS4;Morphological trait;Panicle flower	chr05	20768458	20768517	59	350810	59
chr05	20887132	20891253	Os05g0426200	IDEF2;Resistance or Tolerance;Other soil stress tolerance	chr05	20890515	20890559	44	350978	44
chr05	22339307	22343017	Os05g0454200	bgl;Morphological trait;Culm leaf	chr05	22341395	22341411	16	353095	16
chr05	22815905	22819893	Os05g0463800	OsHAP3B;Physiological trait;Source activity	chr05	22819139	22819279	140	353924	140
chr05	23262252	23264744	Os05g0472700	oszip5;Resistance or Tolerance;Other soil stress tolerance	chr05	23261085	23268901	7816	354666	2492
chr05	23542809	23544731	Os05g0477600	expansin 1;Morphological trait;Dwarf	chr05	23529988	23551518	21530	354968	1922
chr05	23646198	23648306	Os05g0480000	OsSTN8;Physiological trait;Source activity	chr05	23647381	23647393	12	355242	12
chr05	23946639	23952607	Os05g0486100	OsRPK1;Morphological trait;Culm leaf	chr05	23948547	23948628	81	355593	81
chr05	24475113	24476027	Os05g0497200	MSF1;Morphological trait;Panicle flower	chr05	24475258	24475586	328	356163	328
chr05	24570055	24581495	Os05g0498300	OsMSH5;Physiological trait;Sterility	chr05	24572233	24572251	18	356234	18
chr05	25776127	25783336	Os05g0518600	OsTPS1;Resistance or Tolerance;Cold tolerance	chr05	25779026	25779038	12	358101	12
chr05	26405661	26408134	Os05g0530400	OsHsfA4a;Resistance or Tolerance;Other soil stress tolerance	chr05	26389000	26407509	18509	359067	1848
chr05	26408393	26412854	Os05g0530500	snrk1a;Morphological trait;Shoot seedling	chr05	26411255	26411281	26	359094	26
chr05	27259841	27264019	Os05g0547850	OsPDCD5;Resistance or Tolerance;Salinity tolerance	chr05	27260223	27260772	549	360190	549
chr05	27455454	27463787	Os05g0551000	OsHRZ2;Resistance or Tolerance;Other soil stress tolerance	chr05	27456522	27456532	10	360549	10
chr05	27611836	27615346	Os05g0553700	OsSYP71;Resistance or Tolerance;Blast resistance	chr05	27608531	27613180	4649	360690	1344
chr05	27821800	27829365	Os05g0557700	ltn1;Resistance or Tolerance;Other soil stress tolerance	chr05	27822261	27822273	12	360923	12
chr05	28654041	28656737	Os05g0573500	OsHAP3C;Physiological trait;Source activity	chr05	28654636	28654648	12	362025	12
chr05	28953374	28958857	Os05g0580000	LSU3;Others;Others	chr05	28956757	28956782	25	362418	25
chr05	28971122	28978572	Os05g0580500	OsRAD21-4;Physiological trait;Sterility	chr05	28970215	28982753	12538	362432	7450
chr05	29281778	29287295	Os05g0586200	osjar1;Morphological trait;Panicle flower	chr05	29284402	29284438	36	363099	36
chr05	29281810	29287295	Os05g0586200	OsJAR1;Morphological trait;Shoot seedling	chr05	29284402	29284438	36	363099	36
chr05	29537139	29538733	Os05g0591400	OsEBS;Morphological trait;Culm leaf	chr05	29537807	29537823	16	363502	16
chr05	29660631	29662152	Os05g0593900	OsaLeg4;Others;Others	chr05	29657845	29662362	4517	363677	1521
chr05	29835095	29837905	Os05g0597100	HDT701;Resistance or Tolerance;Bacterial blight resistance	chr05	29834545	29885273	50728	363919	2810
chr06	358669	360582	NA	OsaLeg5;Others;Others	chr06	356054	359255	3201	364834	586
chr06	510890	511792	Os06g0108600	Osexpa17;Morphological trait;Root	chr06	311693	527017	215324	364784	902
chr06	579671	585444	Os06g0110000	oskao;Morphological trait;Dwarf	chr06	580471	580481	10	365334	10
chr06	1433771	1434534	Os06g0127100	OsDREB1C;Resistance or Tolerance;Cold tolerance	chr06	1433799	1433835	36	367409	36
chr06	1764623	1769575	Os06g0133000	wx;Physiological trait;Eating quality	chr06	1765668	1765680	12	368482	12
chr06	2040000	2044000	Os06g0138700	DDF1;Morphological trait;Dwarf	chr06	2042499	2084479	41980	369239	1501
chr06	2207763	2208557	Os06g0142350	OsENOD93-1;Morphological trait;Dwarf	chr06	2207829	2207857	28	369550	28
chr06	2805544	2812003	Os06g0154500	OsMAPK6;Others;Others	chr06	2806455	2806476	21	370963	21
chr06	2925824	2927475	Os06g0157500	RFT1;Physiological trait;Flowering	chr06	2925915	2925937	22	371339	22
chr06	2939005	2941453	Os06g0157700	Hd3a;Physiological trait;Flowering	chr06	2928013	2942171	14158	371347	2448
chr06	3161804	3168332	Os06g0162800	OsMADS5;Morphological trait;Panicle flower	chr06	3164040	3164057	17	371719	17
chr06	3448702	3453748	Os06g0168600	v3;Physiological trait;Source activity	chr06	3353103	3709490	356387	372448	5046
chr06	4320831	4324072	Os06g0185900	OsGPX4;Physiological trait;Sterility	chr06	4320128	4321217	1089	374803	386
chr06	5676081	5681053	Os06g0211200	abl1;Others;Others	chr06	5676244	5676280	36	377872	36
chr06	5676158	5681034	Os06g0211200	Osabf2;Morphological trait;Shoot seedling	chr06	5676244	5676280	36	377872	36
chr06	5758686	5760519	Os06g0213100	S5;Physiological trait;Sterility	chr06	5759608	5759744	136	378214	136
chr06	5951600	5962310	Os06g0217300	OsMADS55;Morphological trait;Culm leaf	chr06	5956179	5956199	20	378562	20
chr06	6555698	6556749	Os06g0226500	bu1;Morphological trait;Culm leaf	chr06	6556210	6556256	46	380155	46
chr06	6724344	6733393	Os06g0229300	HOX1a;Morphological trait;Dwarf	chr06	6724676	6725182	506	380500	506
chr06	8847044	8847830	Os06g0266800	OsGSR1;Morphological trait;Culm leaf	chr06	8549039	8857468	308429	386598	786
chr06	9262487	9264330	Os06g0274000	OsHSBP2;Resistance or Tolerance;Other stress resistance	chr06	9264091	9264119	28	389145	28
chr06	9335377	9337570	Os06g0275000	Hd1;Physiological trait;Flowering	chr06	9337002	9337035	33	389427	33
chr06	10386794	10389466	Os06g0286700	Pi2;Resistance or Tolerance;Blast resistance	chr06	10381772	10405661	23889	391899	2672
chr06	12748639	12749852	Os06g0324800	OsPT9;Physiological trait;Culm leaf	chr06	12748564	12748812	248	397834	173
chr06	12760306	12762902	Os06g0325200	OsPT10;Physiological trait;Culm leaf	chr06	12762074	12762152	78	397847	78
chr06	13123254	13126028	Os06g0330100	Pi25;Resistance or Tolerance;Blast resistance	chr06	13123407	13123474	67	398507	67
chr06	14595017	14599806	Os06g0354700	nyc3;Physiological trait;Source activity	chr06	14596220	14596239	19	401143	19
chr06	18037336	18041823	Os06g0494100	Pi-d2;Resistance or Tolerance;Blast resistance	chr06	18041015	18041040	25	408917	25
chr06	20781209	20781553	LOC_Os06g34180	FCP2;Morphological trait;Shoot seedling	chr06	20584121	20857554	273433	413516	344
chr06	22355411	22359638	Os06g0561000	OsMIOX;Resistance or Tolerance;Drought tolerance	chr06	22355280	22359420	4140	418559	4009
chr06	22897875	22905149	Os06g0569500	d35;Morphological trait;Dwarf	chr06	22874146	22932169	58023	420627	7274
chr06	23443778	23448985	LOC_Os06g38120	OsLCT1;Resistance or Tolerance;Other soil stress tolerance	chr06	23445553	23445697	144	422141	144
chr06	24277272	24278370	Os06g0594700	OsAt10;Others;Others	chr06	24276997	24277331	334	423719	59
chr06	24378976	24380494	Os06g0597000	OsIAA23;Morphological trait;Root	chr06	24379162	24379201	39	423862	39
chr06	24490191	24498156	Os06g0598900	Xa27;Resistance or Tolerance;Bacterial blight resistance	chr06	24492548	24492560	12	424052	12
chr06	24730717	24735032	Os06g0603000	YGL2;Physiological trait;Source activity	chr06	24730876	24730933	57	424388	57
chr06	24730775	24735026	Os06g0603000	se5;Physiological trait;Flowering	chr06	24730876	24730933	57	424388	57
chr06	24752440	24756895	Os06g0603600	SPK1(SYG1);Physiological trait;Others	chr06	24750114	24760563	10449	424424	4455
chr06	24752440	24756968	Os06g0603600	OsSPX1;Resistance or Tolerance;Cold tolerance	chr06	24750114	24760563	10449	424424	4528
chr06	24785921	24790804	Os06g0604200	OsPLDα4;Resistance or Tolerance;Insect resistance	chr06	24788414	24788425	11	424673	11
chr06	24798943	24801922	Os06g0604300	OsPLDα5;Resistance or Tolerance;Insect resistance	chr06	24796454	24800326	3872	424685	1383
chr06	25192060	25193385	Os06g0610350	moc1;Morphological trait;Culm leaf	chr06	25186423	25192702	6279	425481	642
chr06	25368996	25371122	Os06g0612800	OsiSAP8;Morphological trait;Shoot seedling	chr06	25367849	25369047	1198	425641	51
chr06	25393545	25396259	Os06g0613400	OsCOM1;Physiological trait;Sterility	chr06	25391826	25400349	8523	425667	2714
chr06	26077334	26087593	Os06g0625400	spp;Morphological trait;Root	chr06	26080408	26080790	382	426552	382
chr06	26108217	26112853	Os06g0625700	CSLA9;Morphological trait;Dwarf	chr06	26109551	26122446	12895	426595	3302
chr06	27149901	27155667	Os06g0644200	OVP1;Resistance or Tolerance;Cold tolerance	chr06	27151831	27151845	14	428475	14
chr06	27529859	27536237	Os06g0651100	YK1;Resistance or Tolerance;Bacterial blight resistance	chr06	27534211	27534227	16	429091	16
chr06	28077809	28081622	Os06g0660200	OsPIN2;Morphological trait;Culm leaf	chr06	28078413	28078424	11	430300	11
chr06	28078632	28081614	Os06g0660200	OsPIN2;Resistance or Tolerance;Other stress resistance	chr06	28080521	28080552	31	430302	31
chr06	28163246	28169854	Os06g0662000	OsVHA-A;Resistance or Tolerance;Drought tolerance	chr06	28164495	28164505	10	430622	10
chr06	28357085	28358456	Os06g0665400	apo1;Morphological trait;Panicle flower	chr06	28357492	28357503	11	430799	11
chr06	28394103	28400606	Os06g0665800	oshma9;Resistance or Tolerance;Other soil stress tolerance	chr06	28399417	28399433	16	431071	16
chr06	28916100	28918883	Os06g0675600	OMTN4;Morphological trait;Culm leaf	chr06	28916588	28917415	827	431972	827
chr06	29949363	29953033	Os06g0695800	star1;Resistance or Tolerance;Other soil stress tolerance	chr06	29949631	29950009	378	433772	378
chr06	30225057	30229118	Os06g0698785	OsCMO;Resistance or Tolerance;Salinity tolerance	chr06	30227814	30227824	10	434105	10
chr06	30615882	30619501	Os06g0704300	OsLIC;Morphological trait;Culm leaf	chr06	30599642	30666287	66645	434475	3619
chr06	30715297	30718402	Os06g0706400	OsPTR9;Morphological trait;Panicle flower	chr06	30715921	30715938	17	434557	17
chr06	31050629	31054998	Os06g0712700	spw1;Morphological trait;Panicle flower	chr06	31051901	31051915	14	434988	14
chr07	133162	142578	Os07g0102300	SRL1;Morphological trait;Culm leaf	chr07	140272	140282	10	435644	10
chr07	212778	218543	Os07g0103500	GA2ox5;Morphological trait;Dwarf	chr07	213287	213309	22	435742	22
chr07	470174	476655	Os07g0108900	MADS15;Morphological trait;Panicle flower	chr07	473778	473835	57	436444	57
chr07	1298598	1303299	Os07g0124700	crl5;Morphological trait;Root	chr07	1300405	1300691	286	439158	286
chr07	1598215	1604338	Os07g0129700	OSH15;Morphological trait;Culm leaf	chr07	1598211	1598221	10	439557	6
chr07	1820994	1826716	Os07g0134000	OsAAT60;Physiological trait;Source activity	chr07	1821716	1821729	13	441180	13
chr07	2099496	2108119	Os07g0139300	g1;Morphological trait;Panicle flower	chr07	2099830	2099848	18	441599	18
chr07	2675692	2679925	Os07g0150700	OsCIPK23;Physiological trait;Sterility	chr07	2678163	2678195	32	442795	32
chr07	3016273	3023066	Os07g0155600	MHZ7/OsEIN2;Morphological trait;Seed	chr07	3014932	3060178	45246	443059	6793
chr07	3016580	3023063	Os07g0155600	OsEIN2;Resistance or Tolerance;Other disease resistance	chr07	3014932	3060178	45246	443059	6483
chr07	3252075	3261389	Os07g0160100	YAB1;Morphological trait;Dwarf	chr07	3252339	3252369	30	443475	30
chr07	3468174	3476885	Os07g0164100	HDA704;Morphological trait;Culm leaf	chr07	3468860	3468874	14	443939	14
chr07	4354384	4358865	Os07g0182000	OsbZIP58;Morphological trait;Seed	chr07	4357145	4357155	10	446069	10
chr07	4421779	4424076	Os07g0182900	MET1b;Morphological trait;Seed	chr07	4375972	4758728	382756	446095	2297
chr07	4517368	4531018	Os07g0184900	osku70;Morphological trait;Dwarf	chr07	4519229	4519655	426	446220	426
chr07	4606397	4608381	Os07g0186000	OsTRXh1;Morphological trait;Dwarf	chr07	4608097	4608109	12	446565	12
chr07	4714632	4719805	Os07g0187700	OsPHF1;Resistance or Tolerance;Other soil stress tolerance	chr07	4713348	4715655	2307	446708	1023
chr07	5677750	5683379	Os07g0204900	OsZDS;Physiological trait;Germination dormancy	chr07	5681376	5681387	11	448813	11
chr07	5837530	5843239	Os07g0207700	sh-h;Morphological trait;Panicle flower	chr07	5834287	5839730	5443	448997	2200
chr07	5917498	5922079	Os07g0209000	OsDGL1;Morphological trait;Root	chr07	5915267	5919258	3991	449105	1760
chr07	6095041	6101456	Os07g0211500	qSD7-1/qPC7;Morphological trait;Seed	chr07	6095043	6095060	17	449551	17
chr07	6526621	6534162	Os07g0217600	Oscyp71Z2;Resistance or Tolerance;Bacterial blight resistance	chr07	6526768	6535747	8979	450127	7394
chr07	7426642	7429733	Os07g0232800	OsZIP8;Resistance or Tolerance;Other soil stress tolerance	chr07	7428759	7428788	29	452230	29
chr07	7437901	7441709	Os07g0232900	OsHMA3;Resistance or Tolerance;Other soil stress tolerance	chr07	7313348	7500866	187518	451880	3808
chr07	7577703	7582070	Os07g0235800	snb;Morphological trait;Panicle flower	chr07	7573029	7577782	4753	452469	79
chr07	8528345	8534061	Os07g0252400	CESA6;Morphological trait;Dwarf	chr07	8532978	8535915	2937	454371	1083
chr07	8903593	8911062	Os07g0257200	Nramp5;Resistance or Tolerance;Other soil stress tolerance	chr07	8906646	8906663	17	455101	17
chr07	8998182	9003013	Os07g0258400	OsNRAMP1;Resistance or Tolerance;Other soil stress tolerance	chr07	8999413	8999445	32	455737	32
chr07	9184534	9187187	Os07g0261200	Ghd7;Physiological trait;Flowering	chr07	9185789	9186003	214	455987	214
chr07	13457442	13463678	Os07g0409900	CPK18;Resistance or Tolerance;Blast resistance	chr07	13458477	13458495	18	465479	18
chr07	14014393	14015451	Os07g0418600	RePRP2.2;Morphological trait;Root	chr07	13810143	14023407	213264	466140	1058
chr07	14026574	14027700	Os07g0418700	RePRP2.1;Morphological trait;Root	chr07	14026887	14026900	13	466604	13
chr07	15413911	15419531	Os07g0438800	OsPHR2;Resistance or Tolerance;Other soil stress tolerance	chr07	15411093	15413943	2850	469721	32
chr07	15414191	15417055	Os07g0438800	OsPHR2;Physiological trait;Others	chr07	15411360	15414202	2842	469721	11
chr07	17182602	17184243	Os07g0466300	Rurm1;Others;Others	chr07	17184023	17184034	11	473521	11
chr07	18865438	18878266	Os07g0490200	oscbt;Resistance or Tolerance;Bacterial blight resistance	chr07	18868332	18870464	2132	477213	2132
chr07	18995153	18997639	Os07g0492000	NDP kinase;Morphological trait;Shoot seedling	chr07	18995859	18995873	14	477449	14
chr07	19285640	19294050	Os07g0497000	OsCHR4;Physiological trait;Source activity	chr07	19290255	19290391	136	478082	136
chr07	19377339	19385812	Os07g0498800	CrtintP1;Resistance or Tolerance;Cold tolerance	chr07	19378107	19378131	24	478168	24
chr07	19720920	19722315	Os07g0503900	-;Others;Others	chr07	19711476	19724784	13308	479528	1395
chr07	19988887	19992038	Os07g0508500	BRK1;Physiological trait;Sterility	chr07	19988839	19989149	310	480089	262
chr07	21384739	21386227	Os07g0529600	OsDR8;Resistance or Tolerance;Bacterial blight resistance	chr07	21384762	21395188	10426	484015	1465
chr07	21384739	21386227	Os07g0592600	GH3-8;Resistance or Tolerance;Bacterial blight resistance	chr07	21384762	21395188	10426	484015	1465
chr07	22882458	22883494	Os07g0556800	OSRIP18;Resistance or Tolerance;Drought tolerance	chr07	22553700	23024427	470727	488261	1036
chr07	24144128	24145465	Os07g0580500	OsBZR1;Morphological trait;Culm leaf	chr07	24144701	24145038	337	491192	337
chr07	24314295	24319767	Os07g0583700	oswrky78;Morphological trait;Dwarf	chr07	24318018	24318084	66	491859	66
chr07	24789871	24797482	Os07g0592200	OsAP65;Physiological trait;Sterility	chr07	24794884	24794920	36	493338	36
chr07	24926636	24933527	Os07g0596300	bui1;Morphological trait;Dwarf	chr07	24927473	24927504	31	493466	31
chr07	25448633	25453836	Os07g0605200	OsMADS18;Physiological trait;Flowering	chr07	25448493	25456132	7639	494567	5203
chr07	26041855	26049689	Os07g0616000	dep2;Morphological trait;Panicle flower	chr07	26044210	26044228	18	495820	18
chr07	26041969	26049689	Os07g0616000	cl7(t);Morphological trait;Culm leaf	chr07	26044210	26044228	18	495820	18
chr07	27141620	27145462	Os07g0637300	OsPDK1;Morphological trait;Dwarf	chr07	27135575	27142916	7341	499075	1296
chr07	27857872	27861552	Os07g0650600	OsBLE2;Morphological trait;Culm leaf	chr07	27857106	27858883	1777	500573	1011
chr07	27857887	27860558	Os07g0650600	aldolase;Morphological trait;Root	chr07	27857106	27858883	1777	500573	996
chr07	29623254	29627436	Os07g0682800	rth1;Morphological trait;Root	chr07	29624419	29624429	10	503668	10
chr08	62575	66639	Os08g0101000	IDEF1;Morphological trait;Shoot seedling	chr08	64352	64364	12	503809	12
chr08	678358	680739	Os08g0112700	OsMADS26;Others;Others	chr08	679382	679395	13	505117	13
chr08	1524413	1528194	Os08g0126300	OsGAPC3;Resistance or Tolerance;Salinity tolerance	chr08	1524317	1524870	553	506763	457
chr08	2076237	2082327	Os08g0137100	OsFIE2;Morphological trait;Root	chr08	2079977	2080027	50	508228	50
chr08	2172394	2176074	Os08g0139000	OsDEG10;Resistance or Tolerance;Cold tolerance	chr08	2172812	2172826	14	508351	14
chr08	2877956	2880729	Os08g0150100	Pi36;Resistance or Tolerance;Blast resistance	chr08	2879345	2879869	524	509304	524
chr08	4332728	4334367	Os08g0174500	DTH8;Physiological trait;Flowering	chr08	4332639	4333981	1342	514261	1253
chr08	4343174	4349505	Os08g0174700	OsBAK1;Morphological trait;Culm leaf	chr08	4348900	4360203	11303	514280	605
chr08	5372365	5375301	Os08g0191700	OsGLY1-11.2;Physiological trait;Others	chr08	5372701	5372720	19	518605	19
chr08	5846214	5847456	Os08g0200600	OMTN6;Morphological trait;Culm leaf	chr08	5847158	5847170	12	519950	12
chr08	6266828	6269909	Os08g0207500	OsZIP4;Resistance or Tolerance;Other soil stress tolerance	chr08	6268486	6268498	12	521306	12
chr08	10159237	10164703	Os08g0266700	OsRAD21-3;Physiological trait;Sterility	chr08	10160304	10160322	18	533018	18
chr08	10809400	10812338	Os08g0278900	SDF2-1;Resistance or Tolerance;Blast resistance	chr08	10809855	10809878	23	534186	23
chr08	14274176	14275558	Os08g0323700	OsCCC1;Resistance or Tolerance;Salinity tolerance	chr08	14274965	14283984	9019	540137	593
chr08	15754341	15758925	Os08g0345800	OsAGPS2b;Physiological trait;Seed	chr08	15758809	15758823	14	543790	14
chr08	15754341	15760588	Os08g0345800	osagps2;Physiological trait;Eating quality	chr08	15758809	15758823	14	543790	14
chr08	17135729	17142058	LOC_Os08g27980	mil1;Physiological trait;Sterility	chr08	17132637	17135744	3107	547430	15
chr08	19395398	19398995	Os08g0404300	S27-2;Physiological trait;Sterility	chr08	19395499	19395837	338	553379	338
chr08	20467829	20474046	Os08g0424500	Badh2;Physiological trait;Eating quality	chr08	20468005	20480095	12090	556822	6041
chr08	20900509	20903633	Os08g0430500	GF14c;Physiological trait;Flowering	chr08	20901547	20901557	10	557721	10
chr08	21666034	21671618	Os08g0442700	coe1;Others;Others	chr08	21666637	21666690	53	559197	53
chr08	22307482	22307879	Os08g0453733	OsrbohE;Resistance or Tolerance;Other stress resistance	chr08	22303480	22316087	12607	560602	397
chr08	24733865	24737837	Os08g0499300	WRKY30;Resistance or Tolerance;Bacterial blight resistance	chr08	24736059	24736439	380	564757	380
chr08	25041942	25042924	Os08g0504700	OsDOG;Morphological trait;Dwarf	chr08	25039528	25048172	8644	565293	982
chr08	25304465	25312083	Os08g0508800	OsHI-LOX;Resistance or Tolerance;Insect resistance	chr08	25305381	25305398	17	565635	17
chr08	25362546	25366701	Os08g0509600	IPA1;Morphological trait;Culm leaf	chr08	25363033	25363059	26	565709	26
chr08	25507889	25509832	Os08g0512600	Orysa;CDKB2;1;Others;Others	chr08	25509223	25509253	30	565833	30
chr08	25981662	25988347	Os08g0520900	OsISA1;Physiological trait;Eating quality	chr08	25986198	25986540	342	566990	342
chr08	26527589	26533478	Os08g0531000	NPP1;Physiological trait;Shoot seedling	chr08	26531036	26531123	87	568565	87
chr08	26589172	26594203	Os08g0531600	qGW8;Morphological trait;Seed	chr08	26593390	26593405	15	568619	15
chr08	26595185	26600266	Os08g0531700	OsMADS7;Morphological trait;Panicle flower	chr08	26597455	26597480	25	568628	25
chr08	26813957	26816799	Os08g0535200	Os8N3;Resistance or Tolerance;Bacterial blight resistance	chr08	26816723	26816741	18	569076	18
chr08	26997042	27001500	Os08g0538300	OsCERK1;Resistance or Tolerance;Blast resistance	chr08	26991810	27020698	28888	569699	4458
chr08	27143096	27147339	Os08g0540400	OsCPK21;Morphological trait;Shoot seedling	chr08	27146676	27146688	12	570328	12
chr08	27408597	27415080	Os08g0545500	OsDREB1G;Resistance or Tolerance;Drought tolerance	chr08	27196188	27436272	240084	570724	6483
chr08	27468770	27478343	Os08g0546800	OsHsfB2b;Resistance or Tolerance;Drought tolerance	chr08	27469815	27469827	12	571462	12
chr08	28079564	28087295	Os08g0559300	OsSPY;Morphological trait;Dwarf	chr08	28084408	28084446	38	572518	38
chr08	28332207	28334033	Os08g0564000	OsPT6;Resistance or Tolerance;Other soil stress tolerance	chr08	28332815	28334979	2164	572804	1218
chr09	432680	437515	Os09g0104200	OsRAD51D;Morphological trait;Panicle flower	chr09	434645	434686	41	573724	41
chr09	1104794	1114585	Os09g0114500	bc12;Morphological trait;Culm leaf	chr09	1110732	1110774	42	574914	42
chr09	1737158	1746264	Os09g0123200	rFCA;Morphological trait;Seed	chr09	1737568	1737885	317	576063	317
chr09	2548365	2554644	Os09g0134500	OsTrx1;Physiological trait;Flowering	chr09	2550069	2550352	283	577272	283
chr09	3613793	3630174	Os09g0240200	OsCO3;Physiological trait;Flowering	chr09	3615855	3615871	16	579339	16
chr09	7020000	7120000	AAZ06207	SUB1A;Morphological trait;Culm leaf	chr09	7020725	7020735	10	589447	10
chr09	8437301	8439367	Os09g0306400	OsbZIP71;Resistance or Tolerance;Drought tolerance	chr09	8408844	8487769	78925	591910	2066
chr09	10236618	10240406	Os09g0327600	Pii;Resistance or Tolerance;Blast resistance	chr09	10237065	10237077	12	596291	12
chr09	10237937	10240384	Os09g0327600	Pi5-1;Resistance or Tolerance;Blast resistance	chr09	10240012	10240035	23	596292	23
chr09	12771438	12775272	Os09g0368500	OsPAO7;Resistance or Tolerance;Other stress resistance	chr09	12767263	12772101	4838	603698	663
chr09	12822147	12823045	Os09g0369000	OsDREB6;Resistance or Tolerance;Drought tolerance	chr09	12822637	12822650	13	603766	13
chr09	13150285	13155067	Os09g0375100	OsHSBP1;Resistance or Tolerance;Other stress resistance	chr09	13150923	13150937	14	604454	14
chr09	13430334	13432785	Os09g0380200	ylc1;Morphological trait;Culm leaf	chr09	13192368	13534946	342578	604597	2451
chr09	14413309	14418763	Os09g0395300	rl9;Morphological trait;Culm leaf	chr09	14417074	14417458	384	607055	384
chr09	14485581	14487312	Os09g0396900	OsVIT2;Physiological trait;Eating quality	chr09	14482896	14510763	27867	607226	1731
chr09	15220561	15221930	Os09g0410500	rep1;Morphological trait;Panicle flower	chr09	15172307	15225648	53341	608917	1369
chr09	15629908	15631440	Os09g0417600	OsWRKY76;Resistance or Tolerance;Bacterial blight resistance	chr09	15629153	15632420	3267	610195	1532
chr09	15646654	15648599	Os09g0417800	OsWRKY62;Resistance or Tolerance;Bacterial blight resistance	chr09	15639284	15650499	11215	610201	1945
chr09	16146742	16151233	Os09g0426800	osgl1-1;Morphological trait;Culm leaf	chr09	16147696	16147737	41	611121	41
chr09	16598274	16601628	Os09g0434200	Osdsg1;Morphological trait;Dwarf	chr09	16600157	16600179	22	611727	22
chr09	16927232	16928982	Os09g0439200	OsJAZ8;Resistance or Tolerance;Bacterial blight resistance	chr09	16927663	16927674	11	612890	11
chr09	16961491	16964548	Os09g0439800	Dro1;Morphological trait;Root	chr09	16962538	16963197	659	612936	659
chr09	16983812	16992349	Os09g0440300	osaldh7;Physiological trait;Eating quality	chr09	16990536	16990548	12	612955	12
chr09	17115337	17121338	Os09g0442700	OsDDM1a;Morphological trait;Dwarf	chr09	17117542	17117553	11	613140	11
chr09	17439752	17441966	Os09g0449000	PTC1;Physiological trait;Sterility	chr09	17435148	17445681	10533	613407	2214
chr09	17442030	17442369	Os09g0449000	TMS 9-1(OsMS1);Physiological trait;Sterility	chr09	17435148	17445681	10533	613407	339
chr09	17539755	17541316	Os09g0451000	aco1;Morphological trait;Dwarf	chr09	17540319	17540331	12	613483	12
chr09	17612255	17615851	Os09g0452200	LYP4;Resistance or Tolerance;Bacterial blight resistance	chr09	17614987	17635138	20151	613655	864
chr09	17843808	17847721	Os09g0456200	OsbZIP72;Resistance or Tolerance;Drought tolerance	chr09	17846676	17847244	568	613984	568
chr09	17942701	17944995	Os09g0457400	Amy3A;Physiological trait;Eating quality	chr09	17942133	17947757	5624	614169	2294
chr09	18505142	18522379	Os09g0469400	isa3;Physiological trait;Eating quality	chr09	18508014	18508025	11	614659	11
chr09	18776338	18777174	Os09g0474000	OsTFX1;Resistance or Tolerance;Bacterial blight resistance	chr09	18589586	18833917	244331	614702	836
chr09	20078670	20084674	Os09g0502100	LGD1;Morphological trait;Culm leaf	chr09	20083628	20083727	99	617249	99
chr09	20274336	20282391	Os09g0506800	PAIR2;Physiological trait;Sterility	chr09	20274546	20274563	17	618258	17
chr09	20307095	20313478	Os09g0507200	OsMADS8;Morphological trait;Panicle flower	chr09	20302328	20311281	8953	618327	4186
chr09	20614711	20617866	Os09g0513000	Xb25;Resistance or Tolerance;Bacterial blight resistance	chr09	20617652	20617679	27	618772	27
chr09	20760752	20768216	Os09g0516300	OsRRMh;Physiological trait;Flowering	chr09	20766434	20766444	10	618923	10
chr09	21132561	21136782	Os09g0521900	OsGEN-L;Physiological trait;Sterility	chr09	21134039	21134068	29	619490	29
chr09	21576480	21580155	Os09g0529700	OsVPS22;Morphological trait;Shoot seedling	chr09	21575896	21577275	1379	620137	795
chr09	21700360	21702723	Os09g0532000	sgr;Physiological trait;Source activity	chr09	21701640	21701657	17	620220	17
chr09	21793678	21799236	Os09g0533600	BSR1;Resistance or Tolerance;Bacterial blight resistance	chr09	21797476	21797981	505	620652	505
chr09	22141774	22143190	Os09g0541000	OsPIP2;7;Resistance or Tolerance;Cold tolerance	chr09	22138633	22145812	7179	621320	1416
chr09	22397412	22398103	Os09g0545300	SAUR39;Morphological trait;Dwarf	chr09	22396636	22399002	2366	622140	691
chr09	22474370	22476371	Os09g0547500	OsLDC-like 1;Resistance or Tolerance;Other stress resistance	chr09	22470073	22481510	11437	622427	2001
chr10	1426573	1430357	Os10g0122600	OsSNDP1;Morphological trait;Root	chr10	1427262	1427303	41	627388	41
chr10	1722588	1731170	Os10g0127900	OsFbx352;Physiological trait;Germination dormancy	chr10	1726569	1726592	23	628390	23
chr10	2864473	2865588	Os10g0148000	OsDIL1;Resistance or Tolerance;Drought tolerance	chr10	2864979	2866376	1397	632280	609
chr10	2876693	2878203	Os10g0148100	OsPRP3;Morphological trait;Panicle flower	chr10	2872618	2883112	10494	632307	1510
chr10	4343782	4347681	Os10g0167600	CPDphotolyase;Resistance or Tolerance;Other stress resistance	chr10	4339237	4347231	7994	636191	3449
chr10	4995588	4996410	Os10g0177000	OsNAC111;Resistance or Tolerance;Blast resistance	chr10	4902894	5098561	195667	637650	822
chr10	13717033	13718410	Os10g0397400	brd2;Morphological trait;Culm leaf	chr10	13717859	13717901	42	656856	42
chr10	14199420	14206349	Os10g0405500	pair3;Physiological trait;Sterility	chr10	14195596	14202004	6408	658075	2584
chr10	15197103	15199951	Os10g0419200	ehd2;Morphological trait;Panicle flower	chr10	15195201	15198913	3712	660924	1810
chr10	16492617	16495443	Os10g0444700	OsPT8;Resistance or Tolerance;Other soil stress tolerance	chr10	16492578	16492708	130	665082	91
chr10	17719262	17723773	Os10g0467800	OsCesA7;Morphological trait;Culm leaf	chr10	17719224	17719268	44	668804	6
chr10	17957058	17960414	Os10g0471700	OsiICK6;Morphological trait;Culm leaf	chr10	17960009	17960028	19	669084	19
chr10	18697856	18700642	Os10g0483000	Osj10gBTF3;Morphological trait;Dwarf	chr10	18698787	18698799	12	670179	12
chr10	18817685	18829950	Os10g0485600	OsDCL3b;Others;Others	chr10	18821500	18823881	2381	670495	2381
chr10	19357494	19361214	Os10g0496900	fgl;Physiological trait;Source activity	chr10	19359757	19359775	18	671752	18
chr10	19392891	19416228	Os10g0497300	RF1A;Physiological trait;Sterility	chr10	19393397	19393410	13	672022	13
chr10	19408835	19410901	Os10g0497432	Rf-1;Physiological trait;Sterility	chr10	19337161	19713885	376724	671575	2066
chr10	19514088	19516881	Os10g0499500	RF1B;Physiological trait;Sterility	chr10	19337161	19713885	376724	671575	2793
chr10	20832313	20841378	Os10g0524400	OsPLDbeta1;Resistance or Tolerance;Blast resistance	chr10	20669801	20973746	303945	676029	9065
chr10	21211470	21215227	Os10g0533600	OsMPK6;Resistance or Tolerance;Bacterial blight resistance	chr10	21205209	21219346	14137	677581	3757
chr10	21318423	21328916	Os10g0536100	OsMADS56;Physiological trait;Flowering	chr10	21326484	21326494	10	677738	10
chr10	21922889	21928047	Os10g0548700	NRRB;Resistance or Tolerance;Blast resistance	chr10	21926221	21927285	1064	678647	1064
chr10	22450841	22452861	Os10g0558900	rl14;Morphological trait;Culm leaf	chr10	22426044	22513074	87030	679596	2020
chr10	22583739	22592045	Os10g0561400	MYBS3;Resistance or Tolerance;Cold tolerance	chr10	22586550	22586560	10	679862	10
chr10	22710059	22712351	Os10g0563600	OsMSRA4.1;Resistance or Tolerance;Salinity tolerance	chr10	22711101	22711623	522	680101	522
chr11	67344	69989	Os11g0102100	WOX3;Morphological trait;Culm leaf	chr11	69530	69543	13	681302	13
chr11	78395	93098	Os11g0102200	phot1a;Physiological trait;Source activity	chr11	78951	78970	19	681314	19
chr11	193178	198317	Os11g0104300	D53;Morphological trait;Culm leaf	chr11	193851	193863	12	681511	12
chr11	1215799	1217923	Os11g0126900	ONAC122;Resistance or Tolerance;Blast resistance	chr11	1215482	1221922	6440	683977	2124
chr11	1215803	1217848	Os11g0126900	OsNAC10;Resistance or Tolerance;Drought tolerance	chr11	1215482	1221922	6440	683977	2045
chr11	1841204	1847173	Os11g0140400	OsACA4;Resistance or Tolerance;Salinity tolerance	chr11	1842143	1842185	42	684651	42
chr11	2221157	2225473	Os11g0148500	ospk1;Morphological trait;Dwarf	chr11	2223197	2223227	30	685055	30
chr11	2495595	2500431	Os11g0153600	YGL138(t);Physiological trait;Source activity	chr11	2496640	2497258	618	685361	618
chr11	3261662	3262630	Os11g0167800	ASR1;Resistance or Tolerance;Cold tolerance	chr11	3261784	3261815	31	686574	31
chr11	4128559	4137950	Os11g0182500	OsPIANK1;Resistance or Tolerance;Bacterial blight resistance	chr11	4129025	4129383	358	688536	358
chr11	4282487	4284994	Os11g0184900	OsNAC5;Physiological trait;Germination dormancy	chr11	4265345	4282817	17472	689821	330
chr11	4768789	4772508	Os11g0195500	OsPAD4;Resistance or Tolerance;Blast resistance	chr11	4772376	4772571	195	691693	132
chr11	4954355	4958274	Os11g0199200	PDIL1;Physiological trait;Eating quality	chr11	4948381	4961267	12886	692199	3919
chr11	6524851	6528954	Os11g0225100	Pia;Resistance or Tolerance;Blast resistance	chr11	6525512	6530369	4857	697091	3442
chr11	6537417	6544615	Os11g0225300	Pia;Resistance or Tolerance;Blast resistance	chr11	6538502	6538930	428	697118	428
chr11	7176158	7181414	Os11g0235200	sp1;Morphological trait;Panicle flower	chr11	7177090	7177456	366	699175	366
chr11	7962459	7965303	Os11g0247300	Tid1;Morphological trait;Culm leaf	chr11	7963125	7963141	16	700517	16
chr11	8074465	8080014	Os11g0249000	nls1-1D;Resistance or Tolerance;Bacterial blight resistance	chr11	8076450	8076470	20	700699	20
chr11	9221867	9223103	Os11g0267000	OsGUN4;Physiological trait;Culm leaf	chr11	9218185	9279244	61059	702540	1236
chr11	16608816	16613691	Os11g0446000	RSS3;Morphological trait;Root	chr11	16608849	16608862	13	717196	13
chr11	19145382	19150905	Os11g0490600	lazy1;Morphological trait;Culm leaf	chr11	19145718	19145798	80	724872	80
chr11	19811498	19812679	Os11g0505200	OsSOT1(STV11);Resistance or Tolerance;Other disease resistance	chr11	19796275	19850206	53931	727355	1181
chr11	20763199	20769515	Os11g0523800	osarf1;Morphological trait;Dwarf	chr11	20763705	20763722	17	730366	17
chr11	21012137	21017940	Os11g0528700	tld1-D;Morphological trait;Culm leaf	chr11	21010570	21017012	6442	731190	4875
chr11	22578497	22579711	Os11g0558200	OsMYB4P;Morphological trait;Root	chr11	22578710	22578737	27	736814	27
chr11	22645516	22648800	Os11g0559200	Xa21;Resistance or Tolerance;Bacterial blight resistance	chr11	22647236	22647892	656	737124	656
chr11	23328353	23332192	Os11g0572700	OsCRTISO;Physiological trait;Germination dormancy	chr11	23327206	23341490	14284	740161	3839
chr11	23328882	23332192	Os11g0572700	zebra2;Physiological trait;Source activity	chr11	23327206	23341490	14284	740161	3310
chr11	23351617	23356865	Os11g0573000	-;Physiological trait;Others	chr11	23351829	23353261	1432	740168	1432
chr11	24064168	24073582	Os11g0587000	d27;Morphological trait;Culm leaf	chr11	24062668	24066256	3588	743100	2088
chr11	24354046	24354944	Os11g0592200	OsPR4;Resistance or Tolerance;Drought tolerance	chr11	24350534	24360501	9967	744411	898
chr11	24408598	24411126	Os11g0592900	BGL11(t);Physiological trait;Source activity	chr11	24410169	24414526	4357	744551	957
chr11	24506800	24507550	Os11g0595400	fon2;Morphological trait;Panicle flower	chr11	24454878	24569687	114809	744662	750
chr11	24704987	24708859	Os11g0598500	Pb1;Resistance or Tolerance;Blast resistance	chr11	24705643	24705658	15	745659	15
chr12	63393	66038	Os12g0101600	WOX3;Morphological trait;Culm leaf	chr12	65369	65403	34	761560	34
chr12	1138155	1140307	Os12g0123700	ONAC131;Resistance or Tolerance;Blast resistance	chr12	1138408	1138471	63	763294	63
chr12	3579463	3581890	Os12g0170400	art1;Resistance or Tolerance;Other soil stress tolerance	chr12	3327086	3661880	334794	766957	2427
chr12	4460763	4461870	Os12g0188700	Ostrxm;Physiological trait;Source activity	chr12	4461519	4461623	104	770388	104
chr12	4514727	4516504	Os12g0189500	OsYUCCA11;Physiological trait;Others	chr12	4440587	4583763	143176	770370	1777
chr12	5583799	5589341	Os12g0207000	OsMADS13;Morphological trait;Panicle flower	chr12	5587060	5587075	15	773027	15
chr12	9776836	9781518	Os12g0270200	ogr1;Others;Others	chr12	9777191	9777830	639	785637	639
chr12	10292630	10296967	Os12g0277500	OsCpn60α1;Morphological trait;Shoot seedling	chr12	10292713	10292730	17	787928	17
chr12	10605422	10610980	Os12g0281300	Pi-ta;Resistance or Tolerance;Blast resistance	chr12	10605716	10605736	20	788497	20
chr12	11319427	11321566	Os12g0292400	OsRBCS4;Physiological trait;Source activity	chr12	11300507	11544995	244488	790364	2139
chr12	15463109	15618170	BAK26566	PSTOL1;Resistance or Tolerance;Other soil stress tolerance	chr12	15463637	15464446	809	799281	809
chr12	15475562	15477583	LOC_Os12g26280	OsORC3;Morphological trait;Root	chr12	15472298	15475710	3412	799292	148
chr12	16648286	16655955	Os12g0465700	DEC;Morphological trait;Culm leaf	chr12	16648792	16648844	52	803239	52
chr12	17133143	17135595	Os12g0472500	OsTDL1A;Physiological trait;Sterility	chr12	17074328	17179996	105668	804082	2452
chr12	19585483	19588466	Os12g0506800	osatg10b;Resistance or Tolerance;Other stress resistance	chr12	19558392	19600659	42267	813983	2983
chr12	19691321	19692329	Os12g0508500	OsbHLH133;Resistance or Tolerance;Other soil stress tolerance	chr12	19689530	19693246	3716	814478	1008
chr12	22251382	22257891	Os12g0545900	Psi?LDMAR;Physiological trait;Sterility	chr12	22253126	22253138	12	820900	12
chr12	22330365	22338268	Os12g0547500	kch1;Morphological trait;Shoot seedling	chr12	22330393	22330410	17	821022	17
chr12	22806620	22810993	Os12g0555600	nd1;Morphological trait;Culm leaf	chr12	22810404	22811109	705	822420	589
chr12	23645878	23650901	Os12g0569700	OsHsp23.7;Physiological trait;Germination dormancy	chr12	23643432	23655576	12144	824967	5023
chr12	23808737	23816436	Os12g0572800	mel2;Physiological trait;Sterility	chr12	23815261	23815307	46	825414	46
chr12	24440920	24442124	Os12g0583700	ZFP252;Resistance or Tolerance;Drought tolerance	chr12	24438548	24449842	11294	826416	1204
chr12	25500000	25550000	AB510479	SK2;Resistance or Tolerance;Submergency tolerance	chr12	25500778	25500807	29	828674	29
chr12	25617000	25642000	AB510478	SK1;Resistance or Tolerance;Submergency tolerance	chr12	25626457	25626506	49	828783	49
chr12	26028027	26030046	Os12g0610600	OMTN3;Morphological trait;Culm leaf	chr12	26028063	26028112	49	829772	49
chr12	26147088	26153800	Os12g0612700	OsHox33;Physiological trait;Source activity	chr12	26153146	26153221	75	830505	75
chr12	26281668	26283429	Os12g0614600	OsPID;Morphological trait;Panicle flower	chr12	26281828	26282409	581	830938	581
chr12	26533210	26542250	Os12g0617900	OsPPKL3;Morphological trait;Seed	chr12	26535460	26536768	1308	831336	1308
chr12	26804448	26807436	Os12g0622500	OsSpo11-4;Physiological trait;Sterility	chr12	26800830	26825671	24841	831790	2988
chr12	27248442	27251683	Os12g0631100	glup4;Physiological trait;Eating quality	chr12	27119155	27305822	186667	833890	3241

## Sheet: SV-Rich Region
Enriched Genes Categories in SV-rich Regions
System	Gene Category	List Hits	List Total	Population Hits	Population Total	Probability	Hochberg	Gene identifiers	msu7_genes
CLASS_mapman-path_msu7	30.2.24_signalling.receptor kinases.S-locus glycoprotein like	58	3393	284	55785	3.39E-16	2.65E-13	G35380; A02810; J04730; G35810; G35650; K44860; G35740; A02830; A02760; K11780; G35690; D52630; D52614; A02690; A02780; K11890; K34610; G35310; G35330; G35260; G35280; G35370; A02800; J04720; G43570; H13870; G35390; G35730; A02730; E03920; K44690; G35660; C12150; D52600; G35750; A02750; A02840; G08860; G35680; G35770; A02680; D52606; A02770; D52640; G35790; A02790; G35300; D52590; G35410; K34624;…	LOC_OS01G02680; LOC_OS01G02690; LOC_OS01G02700; LOC_OS01G02730; LOC_OS01G02750; LOC_OS01G02760; LOC_OS01G02770; LOC_OS01G02780; LOC_OS01G02790; LOC_OS01G02800; LOC_OS01G02810; LOC_OS01G02830; LOC_OS01G02840; LOC_OS03G12150; LOC_OS04G09770; LOC_OS04G52590; LOC_OS04G52600; LOC_OS04G52606; LOC_OS04G52614; LOC_OS04G52630; LOC_OS04G52640; LOC_OS05G03920; LOC_OS06G13320; LOC_OS07G08860; LOC_OS07G35260;…
CLASS_mapman-path_msu7	20.1.7_stress.biotic.PR-proteins	67	3393	525	55785	9.74E-09	7.29E-06	A33684; L17490; L30080; A20720; L11370; K45930; H42930; L29290; K44970; K37860; H15880; H43010; K45970; K44990; H07774; G08890; K45050; K37880; B40190; K45160; J07574; H43050; K45090; K46070; K45180; J04342; L11500; B18080; K39320; I34150; L17550; A41780; J04290; D02030; L17480; K44580; L30070; D30930; A41890; J07978; L29280; K36020; K45924; K44960; K11770; K35890; H43000; K29920; K35980; K11790;…	LOC_OS01G20720; LOC_OS01G33684; LOC_OS01G41750; LOC_OS01G41770; LOC_OS01G41780; LOC_OS01G41890; LOC_OS02G18070; LOC_OS02G18080; LOC_OS02G18140; LOC_OS02G40190; LOC_OS04G02030; LOC_OS04G02110; LOC_OS04G02450; LOC_OS04G30930; LOC_OS07G08890; LOC_OS08G07774; LOC_OS08G13800; LOC_OS08G15880; LOC_OS08G42930; LOC_OS08G43000; LOC_OS08G43010; LOC_OS08G43050; LOC_OS09G34150; LOC_OS09G34160; LOC_OS10G04290;…
CLASS_mapman-path_msu7	30.2.19_signalling.receptor kinases.legume-lectin	12	3393	41	55785	3.78E-06	2.72E-03	G15940; G04000; G03950; G04010; G04110; G03970; F10790; J30530; G04040; C56160; G04130; J30540	LOC_OS03G56160; LOC_OS06G10790; LOC_OS07G03950; LOC_OS07G03970; LOC_OS07G04000; LOC_OS07G04010; LOC_OS07G04040; LOC_OS07G04110; LOC_OS07G04130; LOC_OS07G15940; LOC_OS10G30530; LOC_OS10G30540
CLASS_mapman-path_msu7	30.2.99_signalling.receptor kinases.misc	52	3393	447	55785	6.49E-06	4.66E-03	A02810; I19140; H14950; A02830; K39370; L29434; B42110; L42040; B40240; A02760; L42060; H14990; B42150; J02250; J13970; K46970; K29790; J06030; G03950; A05940; B42190; I16980; D52780; A05870; H03200; A05960; D09780; G03990; D35114; A02800; J06090; D04914; H03240; A02840; H03170; A60060; I18530; K47490; I18620; A02770; L42070; B40180; B42160; C56180; K46980; F03970; D51050; J02284; D09770; I18594;…	LOC_OS01G02760; LOC_OS01G02770; LOC_OS01G02800; LOC_OS01G02810; LOC_OS01G02830; LOC_OS01G02840; LOC_OS01G05870; LOC_OS01G05940; LOC_OS01G05960; LOC_OS01G60060; LOC_OS02G40180; LOC_OS02G40240; LOC_OS02G42110; LOC_OS02G42150; LOC_OS02G42160; LOC_OS02G42190; LOC_OS02G43290; LOC_OS03G56180; LOC_OS04G04914; LOC_OS04G09770; LOC_OS04G09780; LOC_OS04G35114; LOC_OS04G51050; LOC_OS04G52780; LOC_OS06G03970;…
CLASS_mapman-path_msu7	30.2.12_signalling.receptor kinases.leucine rich repeat XII	12	3393	50	55785	3.48E-05	2.46E-02	J13970; K29790; H14940; F08690; H14950; F08710; A05940; A05960; B40180; H14990; B40200; K46960	LOC_OS01G05940; LOC_OS01G05960; LOC_OS02G40180; LOC_OS02G40200; LOC_OS06G08690; LOC_OS06G08710; LOC_OS08G14940; LOC_OS08G14950; LOC_OS08G14990; LOC_OS10G13970; LOC_OS11G29790; LOC_OS11G46960
CLASS_mapman-path_msu7	20.1_stress.biotic	43	3393	388	55785	0.000118439	8.24E-02	L43490; K47530; K39260; L12600; K40180; K47550; K39280; K47447; K47570; J31770; K37950; A25340; K37970; B35130; D02460; L27220; L27310; G19040; L43440; I34130; K47500; I34150; K47520; D02120; K28470; L18750; K39290; K47560; K37850; K37940; K38580; K38000; K45130; K37960; J04400; H09110; L43700; L43450; K46080; K13410; L27254; K47510; J04429	LOC_OS01G25340; LOC_OS02G35130; LOC_OS04G02120; LOC_OS04G02460; LOC_OS07G19040; LOC_OS08G09110; LOC_OS09G34130; LOC_OS09G34150; LOC_OS10G04400; LOC_OS10G04429; LOC_OS10G31770; LOC_OS11G13410; LOC_OS11G28470; LOC_OS11G37850; LOC_OS11G37940; LOC_OS11G37950; LOC_OS11G37960; LOC_OS11G37970; LOC_OS11G38000; LOC_OS11G38580; LOC_OS11G39260; LOC_OS11G39280; LOC_OS11G39290; LOC_OS11G40180; LOC_OS11G45130;…
CLASS_mapman-path_msu7	10.3_cell wall.hemicellulose synthesis	8	3393	27	55785	0.000144895	1.00E-01	F10910; F10920; F10930; L41956; F10950; F10960; F10970; F10980	LOC_OS06G10910; LOC_OS06G10920; LOC_OS06G10930; LOC_OS06G10950; LOC_OS06G10960; LOC_OS06G10970; LOC_OS06G10980; LOC_OS12G41956
CLASS_mapman-path_msu7	21.2.2_redox.ascorbate and glutathione.glutathione	6	3393	15	55785	0.00015634	1.08E-01	A05820; E03820; K42350; A05810; L16200; F08670	LOC_OS01G05810; LOC_OS01G05820; LOC_OS05G03820; LOC_OS06G08670; LOC_OS11G42350; LOC_OS12G16200
CLASS_mapman-path_msu7	30.2.11_signalling.receptor kinases.leucine rich repeat XI	27	3393	220	55785	0.00042727	2.91E-01	L43660; H14940; B40130; F08690; K36000; H14950; H14960; B40240; K35980; H14990; B40180; K47000; B12910; B40190; F38100; K46970; K29790; C56270; F03970; F08710; B43250; A05940; D52780; A05960; L43640; L17550; B40200	LOC_OS01G05940; LOC_OS01G05960; LOC_OS02G12910; LOC_OS02G40130; LOC_OS02G40180; LOC_OS02G40190; LOC_OS02G40200; LOC_OS02G40240; LOC_OS02G43250; LOC_OS03G56270; LOC_OS04G52780; LOC_OS06G03970; LOC_OS06G08690; LOC_OS06G08710; LOC_OS06G38100; LOC_OS08G14940; LOC_OS08G14950; LOC_OS08G14960; LOC_OS08G14990; LOC_OS11G29790; LOC_OS11G35980; LOC_OS11G36000; LOC_OS11G46970; LOC_OS11G47000; LOC_OS12G17550;…
CLASS_mapman-path_msu7	34.19.1_transport.Major Intrinsic Proteins.PIP	5	3393	13	55785	0.000706714	4.75E-01	G26640; G26690; B41860; G26660; G26630	LOC_OS02G41860; LOC_OS07G26630; LOC_OS07G26640; LOC_OS07G26660; LOC_OS07G26690
CLASS_mapman-path_msu7	11.7_lipid metabolism.unassigned	3	3393	5	55785	0.002048255	1.00E+00	A26039; A26000; A25990	LOC_OS01G25990; LOC_OS01G26000; LOC_OS01G26039
CLASS_mapman-path_msu7	20.2.99_stress.abiotic.unspecified	13	3393	88	55785	0.002520205	1.00E+00	H09010; H08960; H09020; H08970; H08980; H09040; H08990; H09060; D52720; L31710; J32590; H09080; H09000	LOC_OS04G52720; LOC_OS08G08960; LOC_OS08G08970; LOC_OS08G08980; LOC_OS08G08990; LOC_OS08G09000; LOC_OS08G09010; LOC_OS08G09020; LOC_OS08G09040; LOC_OS08G09060; LOC_OS08G09080; LOC_OS10G32590; LOC_OS12G31710
CLASS_mapman-path_msu7	26.10_misc.cytochrome P450	35	3393	350	55785	0.002845511	1.00E+00	C63310; J36960; J37020; J37110; J36980; J08319; G26870; E25640; A41810; D05060; J30410; H16320; D09920; G19130; B38940; J10040; J37100; D10160; I10340; J37120; J37034; J37050; F03930; J08540; J37070; A41800; J37160; J08474; A41820; B38930; C25150; F15680; H16260; F30500; G28160	LOC_OS01G41800; LOC_OS01G41810; LOC_OS01G41820; LOC_OS02G38930; LOC_OS02G38940; LOC_OS03G25150; LOC_OS03G63310; LOC_OS04G05060; LOC_OS04G09920; LOC_OS04G10160; LOC_OS05G25640; LOC_OS06G03930; LOC_OS06G15680; LOC_OS06G30500; LOC_OS07G19130; LOC_OS07G26870; LOC_OS07G28160; LOC_OS08G16260; LOC_OS08G16320; LOC_OS09G10340; LOC_OS10G08319; LOC_OS10G08474; LOC_OS10G08540; LOC_OS10G10040; LOC_OS10G30410;…
CLASS_mapman-path_msu7	29.7.13_protein.glycosylation.alpha-1,4-fucosyltransferase(alpha-1,4-FucT)	2	3393	2	55785	0.003698389	1.00E+00	D35270; L07290	LOC_OS04G35270; LOC_OS12G07290
CLASS_GO-SLIM_MSU7	F|kinase activity	191	1495	2007	25409	1.30E-11	9.93E-09	I25090; J10030; A02810; B40130; L42020; H14950; H03160; K39370; K11780; K10980; K46950; K46880; F38100; G03950; G26170; A05940; A05870; L11500; G35280; D35114; A41870; J06090; H13870; L36194; H03240; D52600; H14960; A02750; H03170; I18530; A02680; D52606; B12810; C56160; G35790; K46960; I25100; A41730; G04110; L27520; G04040; G35290; F08680; G35650; K11000; K44860; A02830; L42040; B42110; B41890;…	LOC_OS01G02680; LOC_OS01G02690; LOC_OS01G02700; LOC_OS01G02730; LOC_OS01G02750; LOC_OS01G02760; LOC_OS01G02770; LOC_OS01G02780; LOC_OS01G02790; LOC_OS01G02800; LOC_OS01G02810; LOC_OS01G02830; LOC_OS01G02840; LOC_OS01G05870; LOC_OS01G05940; LOC_OS01G05960; LOC_OS01G22390; LOC_OS01G41730; LOC_OS01G41870; LOC_OS01G56330; LOC_OS01G60060; LOC_OS01G60070; LOC_OS02G12340; LOC_OS02G12810; LOC_OS02G12910;…
CLASS_GO-SLIM_MSU7	C|cell	218	1495	2701	25409	6.05E-07	4.45E-04	A02810; K47530; L30080; B40130; L42020; C27510; H03160; K33270; G37385; A42090; C27590; C34300; K34720; G26170; E04160; G35350; F13420; B39960; H13870; D55940; C47120; H03240; A22352; A02750; K37920; H03170; E30760; I18530; A02680; D35190; F01050; L16230; F37020; K45220; A41800; K42390; D32070; L43700; K34660; G04040; L11510; C25350; B12890; C25280; L43490; F08680; L12600; L18560; L11370; I08270;…	LOC_OS01G02680; LOC_OS01G02690; LOC_OS01G02700; LOC_OS01G02710; LOC_OS01G02730; LOC_OS01G02750; LOC_OS01G02760; LOC_OS01G02770; LOC_OS01G02780; LOC_OS01G02790; LOC_OS01G02800; LOC_OS01G02810; LOC_OS01G02830; LOC_OS01G02840; LOC_OS01G22352; LOC_OS01G41800; LOC_OS01G41810; LOC_OS01G41820; LOC_OS01G41890; LOC_OS01G42090; LOC_OS01G42110; LOC_OS01G42120; LOC_OS01G56320; LOC_OS01G59970; LOC_OS01G60060;…
CLASS_GO-SLIM_MSU7	P|response to stress	267	1495	3607	25409	2.80E-05	1.99E-02	K47530; L30080; B40130; G43580; E33510; K45930; J02300; H42930; I09270; H13070; C63440; F13560; K44990; G08890; J08550; B42170; L17600; H21670; J04342; C25340; D02050; A22352; E33520; G04180; J36972; K37850; D08370; K38580; E33380; A25330; I25100; H13800; K09370; L17540; K41300; K11720; C25280; K41230; L12600; G43670; K47550; B41890; G26690; K37860; H13090; E33390; D02640; K39030; G19040; K40009;…	LOC_OS01G05790; LOC_OS01G20720; LOC_OS01G22230; LOC_OS01G22249; LOC_OS01G22336; LOC_OS01G22352; LOC_OS01G22370; LOC_OS01G25330; LOC_OS01G25386; LOC_OS01G33684; LOC_OS01G41750; LOC_OS01G41770; LOC_OS01G41780; LOC_OS01G41834; LOC_OS01G41890; LOC_OS01G56330; LOC_OS01G56380; LOC_OS01G56390; LOC_OS01G68324; LOC_OS02G12350; LOC_OS02G18070; LOC_OS02G18080; LOC_OS02G18140; LOC_OS02G34260; LOC_OS02G34270;…
CLASS_GO-SLIM_MSU7	P|protein modification process	221	1495	2910	25409	3.29E-05	2.33E-02	I25090; J10030; A02810; B40130; L42020; H14950; H03160; K39370; K11780; K46950; A22490; K46880; F38100; G26170; A05940; A05870; G35280; D35114; A41870; C63300; J06090; J13810; H13870; F03800; H03240; L41956; D52600; H14960; A02750; H03170; D08370; I18530; A02680; H08760; D52606; H15040; B12810; G35790; K46960; B38804; I25100; A41730; K09370; L27520; G04040; G35290; F08680; G35650; H15840; K44860;…	LOC_OS01G02680; LOC_OS01G02690; LOC_OS01G02700; LOC_OS01G02730; LOC_OS01G02750; LOC_OS01G02760; LOC_OS01G02770; LOC_OS01G02780; LOC_OS01G02790; LOC_OS01G02800; LOC_OS01G02810; LOC_OS01G02830; LOC_OS01G02840; LOC_OS01G05760; LOC_OS01G05870; LOC_OS01G05940; LOC_OS01G05960; LOC_OS01G22390; LOC_OS01G22490; LOC_OS01G25370; LOC_OS01G41730; LOC_OS01G41870; LOC_OS01G42040; LOC_OS01G56330; LOC_OS01G60060;…
CLASS_GO-SLIM_MSU7	C|plasma membrane	231	1495	3101	25409	7.32E-05	5.14E-02	H14950; K45930; K39370; J02300; E30680; K29750; A25320; B12800; K10980; I35720; J30790; K46950; A42090; G08890; J08550; E25640; K46880; F38100; K39010; G03950; G15460; A05940; B38940; J04342; A05870; L43550; B12880; G35280; D35114; J06090; H07810; K44850; J07978; J30580; I34280; D52600; H14960; G04180; L29550; K38580; K38000; D52606; H15040; E33380; B12810; K11790; C56160; B38800; G35790; K46960;…	LOC_OS01G05870; LOC_OS01G05940; LOC_OS01G05960; LOC_OS01G18670; LOC_OS01G19450; LOC_OS01G19610; LOC_OS01G25320; LOC_OS01G25386; LOC_OS01G42060; LOC_OS01G42090; LOC_OS01G42110; LOC_OS01G42140; LOC_OS01G56330; LOC_OS01G59930; LOC_OS01G68324; LOC_OS02G12794; LOC_OS02G12800; LOC_OS02G12810; LOC_OS02G12870; LOC_OS02G12880; LOC_OS02G12910; LOC_OS02G13850; LOC_OS02G13870; LOC_OS02G28870; LOC_OS02G33630;…
CLASS_GO-SLIM_MSU7	F|nucleotide binding	193	1495	2556	25409	0.000151547	1.05E-01	I25090; L30080; B40130; H14950; K45930; G16040; K11780; F03940; G08890; F38100; G02140; A05940; K39300; J04342; A05870; L43550; G35280; J06090; H03310; H13870; L36194; J07978; D52600; H14960; G15970; K37850; D08370; K38580; K38000; D52606; K11790; G35790; K46960; I25100; H13800; H09200; K39310; G35290; F08680; A42030; G35650; K11000; K44860; J32550; B41890; A02760; K37860; D52614; I18540; J37060;…	LOC_OS01G02700; LOC_OS01G02720; LOC_OS01G02760; LOC_OS01G05870; LOC_OS01G05940; LOC_OS01G05960; LOC_OS01G22390; LOC_OS01G41890; LOC_OS01G42030; LOC_OS01G42070; LOC_OS01G60060; LOC_OS01G60070; LOC_OS02G12340; LOC_OS02G12850; LOC_OS02G35010; LOC_OS02G35130; LOC_OS02G38900; LOC_OS02G40130; LOC_OS02G40180; LOC_OS02G40190; LOC_OS02G40200; LOC_OS02G40240; LOC_OS02G41890; LOC_OS02G41980; LOC_OS02G42160;…
CLASS_GO-SLIM_MSU7	P|cell communication	33	1495	286	25409	0.000175868	1.21E-01	J36924; K40080; K47530; D02050; G43670; H13130; K47550; L18750; K41260; H13060; K47560; K47570; H13070; H15030; K41290; K40480; H13090; L06520; E33390; K40490; H13180; I16850; D36640; I16870; G19040; G43600; G43530; K40220; K47500; K41300; K47510; K41310; K47520	LOC_OS04G02050; LOC_OS04G36640; LOC_OS05G33390; LOC_OS07G19040; LOC_OS07G43530; LOC_OS07G43600; LOC_OS07G43670; LOC_OS08G13060; LOC_OS08G13070; LOC_OS08G13090; LOC_OS08G13130; LOC_OS08G13180; LOC_OS08G15030; LOC_OS09G16850; LOC_OS09G16870; LOC_OS10G36924; LOC_OS11G40080; LOC_OS11G40220; LOC_OS11G40480; LOC_OS11G40490; LOC_OS11G41260; LOC_OS11G41290; LOC_OS11G41300; LOC_OS11G41310; LOC_OS11G47500;…
CLASS_GO-SLIM_MSU7	P|response to extracellular stimulus	33	1495	304	25409	0.000533822	3.62E-01	J36924; K40080; K47530; D02050; G43670; H13130; K47550; L18750; K41260; H13060; K47560; K47570; H13070; H15030; K41290; K40480; H13090; L06520; E33390; K40490; H13180; I16850; K29870; I16870; G19040; G43600; G43530; K40220; K47500; K41300; K47510; K41310; K47520	LOC_OS04G02050; LOC_OS05G33390; LOC_OS07G19040; LOC_OS07G43530; LOC_OS07G43600; LOC_OS07G43670; LOC_OS08G13060; LOC_OS08G13070; LOC_OS08G13090; LOC_OS08G13130; LOC_OS08G13180; LOC_OS08G15030; LOC_OS09G16850; LOC_OS09G16870; LOC_OS10G36924; LOC_OS11G29870; LOC_OS11G40080; LOC_OS11G40220; LOC_OS11G40480; LOC_OS11G40490; LOC_OS11G41260; LOC_OS11G41290; LOC_OS11G41300; LOC_OS11G41310; LOC_OS11G47500;…

## Sheet: SSRs in UTRs
SV in 5'UTR				Simple Sequence Repeat (SSR)
CHR	START	END	SV Type	CHR	START	END	Motif (%3)	SSR length
chr01	11261	11267	DEL	chr01	11262	11288	gcg	18
chr01	11274	11277	DEL	chr01	11271	11285	gcg	9
chr01	91490	91499	DEL	chr01	91496	91528	aca	27
chr01	170267	170276	DEL	chr01	170259	170300	tct	27
chr01	170267	170276	DEL	chr01	170274	170309	ttc	27
chr01	170273	170279	DEL	chr01	170267	170290	ttc	18
chr01	170273	170279	DEL	chr01	170274	170300	ttc	18
chr01	209881	209884	DEL	chr01	209878	209892	tct	9
chr01	256850	256856	DEL	chr01	256844	256867	gcg	18
chr01	308800	308809	DEL	chr01	308792	308833	ctt	27
chr01	308800	308809	DEL	chr01	308804	308842	cttggc	27
chr01	579487	579496	DEL	chr01	579489	579524	aag	27
chr01	579487	579496	DEL	chr01	579497	579529	gag	27
chr01	579496	579499	DEL	chr01	579493	579507	aga	9
chr01	605578	605590	DEL	chr01	605566	605607	atg	36
chr01	651807	651810	DEL	chr01	651804	651818	cct	9
chr01	737929	737935	DEL	chr01	737930	737953	cgg	18
chr01	1059741	1059747	DEL	chr01	1059742	1059768	ctt	18
chr01	1093472	1093487	DEL	chr01	1093491	1093541	agg	45
chr01	1190909	1190927	DEL	chr01	1190894	1190953	cac	54
chr01	1190909	1190927	DEL	chr01	1190936	1190995	atg	54
chr01	1746485	1746488	DEL	chr01	1746482	1746496	gac	9
chr01	1941103	1941106	DEL	chr01	1941100	1941114	aag	9
chr01	1951941	1951947	DEL	chr01	1951943	1951966	tag	18
chr01	1951942	1951948	DEL	chr01	1951943	1951966	tag	18
chr01	2120437	2120449	DEL	chr01	2120445	2120486	ctc	36
chr01	2120497	2120503	DEL	chr01	2120492	2120515	cac	18
chr01	2120497	2120503	DEL	chr01	2120498	2120524	cag	18
chr01	2202372	2202384	DEL	chr01	2202373	2202420	agctag	36
chr01	2245782	2245794	DEL	chr01	2245788	2245841	gcc	36
chr01	2270950	2270953	DEL	chr01	2270947	2270961	cgc	9
chr01	2275174	2275177	DEL	chr01	2275171	2275185	ctc	9
chr01	2403285	2403288	DEL	chr01	2403282	2403296	cgt	9
chr01	2406517	2406523	DEL	chr01	2406518	2406544	cgg	18
chr01	2588923	2588926	DEL	chr01	2588920	2588934	cgg	9
chr01	2652720	2652723	DEL	chr01	2652717	2652731	aga	9
chr01	2989201	2989207	DEL	chr01	2989202	2989228	cgg	18
chr01	3140103	3140115	DEL	chr01	3140100	3140147	cgg	36
chr01	3140103	3140115	DEL	chr01	3140110	3140151	gga	36
chr01	3140103	3140115	DEL	chr01	3140116	3140157	ggc	36
chr01	3283021	3283027	DEL	chr01	3283019	3283042	att	18
chr01	3574187	3574190	DEL	chr01	3574184	3574198	cgg	9
chr01	3744433	3744442	DEL	chr01	3744434	3744475	ggt	27
chr01	3875853	3875856	DEL	chr01	3875850	3875864	ccg	9
chr01	4318765	4318771	DEL	chr01	4318766	4318792	aga	18
chr01	4326284	4326293	DEL	chr01	4326280	4326318	attttt	27
chr01	4718682	4718691	DEL	chr01	4718683	4718724	cgc	27
chr01	4798364	4798382	DEL	chr01	4798347	4798406	cgt	54
chr01	4798364	4798382	DEL	chr01	4798365	4798445	ggc	54
chr01	4816892	4816901	DEL	chr01	4816890	4816922	gta	27
chr01	4816892	4816901	DEL	chr01	4816895	4816927	agc	27
chr01	4816939	4816948	DEL	chr01	4816943	4816975	cta	27
chr01	4852473	4852476	DEL	chr01	4852470	4852484	cgc	9
chr01	4985068	4985080	DEL	chr01	4985069	4985125	ctc	36
chr01	5025633	5025642	DEL	chr01	5025634	5025675	ggc	27
chr01	5373616	5373625	DEL	chr01	5373612	5373644	cta	27
chr01	5373617	5373623	DEL	chr01	5373612	5373635	cta	18
chr01	5373621	5373630	DEL	chr01	5373612	5373644	cta	27
chr01	5493217	5493223	DEL	chr01	5493218	5493244	tcc	18
chr01	5671435	5671444	DEL	chr01	5671428	5671472	gcggag	27
chr01	5671435	5671444	DEL	chr01	5671442	5671474	gga	27
chr01	5679474	5679489	DEL	chr01	5679467	5679517	gcg	45
chr01	5679474	5679489	DEL	chr01	5679474	5679524	cgc	45
chr01	5679474	5679489	DEL	chr01	5679480	5679533	cgg	45
chr01	5679474	5679489	DEL	chr01	5679487	5679537	gga	45
chr01	6224216	6224222	DEL	chr01	6224212	6224235	ctc	18
chr01	6507033	6507036	DEL	chr01	6507030	6507044	tct	9
chr01	6645101	6645107	DEL	chr01	6645102	6645128	gcg	18
chr01	7061433	7061442	DEL	chr01	7061443	7061475	tcg	27
chr01	7061442	7061448	DEL	chr01	7061443	7061469	tcg	18
chr01	7249793	7249802	DEL	chr01	7249794	7249835	cca	27
chr01	7280174	7280189	DEL	chr01	7280175	7280246	gcg	45
chr01	7287951	7287960	DEL	chr01	7287952	7287993	gcc	27
chr01	7340783	7340789	DEL	chr01	7340777	7340806	gcg	18
chr01	7817800	7817812	DEL	chr01	7817800	7817844	cgg	36
chr01	7817800	7817812	DEL	chr01	7817813	7817857	ggc	36
chr01	7876319	7876325	DEL	chr01	7876313	7876342	cgg	18
chr01	7876319	7876325	DEL	chr01	7876323	7876346	gga	18
chr01	7876322	7876325	DEL	chr01	7876319	7876333	cgg	9
chr01	7876328	7876340	DEL	chr01	7876316	7876360	cgg	36
chr01	7876328	7876340	DEL	chr01	7876323	7876373	gga	36
chr01	7876328	7876340	DEL	chr01	7876341	7876385	gga	36
chr01	9245630	9245639	DEL	chr01	9245631	9245672	cgc	27
chr01	9293273	9293285	DEL	chr01	9293267	9293308	tgt	36
chr01	9329277	9329283	DEL	chr01	9329271	9329300	ttgcgg	18
chr01	9329277	9329283	DEL	chr01	9329283	9329306	ctt	18
chr01	10822690	10822702	DEL	chr01	10822691	10822747	cct	36
chr01	11234722	11234737	DEL	chr01	11234717	11234770	tct	45
chr01	11234722	11234737	DEL	chr01	11234726	11234788	tcc	45
chr01	11234725	11234728	DEL	chr01	11234722	11234736	ttc	9
chr01	11234740	11234746	DEL	chr01	11234734	11234763	ctc	18
chr01	11272176	11272191	DEL	chr01	11272187	11272237	cct	45
chr01	11585680	11585689	DEL	chr01	11585681	11585722	tcc	27
chr01	12734158	12734170	DEL	chr01	12734153	12734194	ctt	36
chr01	12734158	12734170	DEL	chr01	12734159	12734215	ctc	36
chr01	13272682	13272688	DEL	chr01	13272683	13272709	cct	18
chr01	13296405	13296420	DEL	chr01	13296406	13296474	ccg	45
chr01	13342182	13342188	DEL	chr01	13342183	13342209	cct	18
chr01	13531668	13531686	DEL	chr01	13531663	13531722	ccg	54
chr01	13531668	13531686	DEL	chr01	13531672	13531731	gcc	54
chr01	13531668	13531686	DEL	chr01	13531687	13531746	gca	54
chr01	14059640	14059643	DEL	chr01	14059637	14059651	ttc	9
chr01	14487105	14487111	DEL	chr01	14487099	14487122	gga	18
chr01	14487105	14487111	DEL	chr01	14487106	14487132	gga	18
chr01	14793110	14793134	DEL	chr01	14793101	14793178	cac	72
chr01	14793110	14793134	DEL	chr01	14793140	14793217	agt	72
chr01	15146158	15146173	DEL	chr01	15146159	15146212	gcg	45
chr01	15146158	15146173	DEL	chr01	15146170	15146229	ggc	45
chr01	15934535	15934544	DEL	chr01	15934536	15934568	tac	27
chr01	16086654	16086666	DEL	chr01	16086655	16086696	tcc	36
chr01	16086654	16086666	DEL	chr01	16086668	16086709	ctc	36
chr01	16130567	16130570	DEL	chr01	16130564	16130578	ctc	9
chr01	16706283	16706295	DEL	chr01	16706284	16706340	cgc	36
chr01	17325670	17325676	DEL	chr01	17325670	17325693	cgg	18
chr01	17444535	17444550	DEL	chr01	17444538	17444588	tat	45
chr01	17444535	17444550	DEL	chr01	17444544	17444606	gggatggag	45
chr01	17444543	17444552	DEL	chr01	17444538	17444570	tat	27
chr01	17444555	17444564	DEL	chr01	17444546	17444590	gatggaggg	27
chr01	17444555	17444564	DEL	chr01	17444564	17444596	agt	27
chr01	17756166	17756169	DEL	chr01	17756163	17756177	ctc	9
chr01	17912114	17912120	DEL	chr01	17912118	17912141	ctc	18
chr01	18095157	18095166	DEL	chr01	18095158	18095199	cgc	27
chr01	18540712	18540721	DEL	chr01	18540721	18540753	cac	27
chr01	18968913	18968919	DEL	chr01	18968914	18968940	ggc	18
chr01	19009723	19009726	DEL	chr01	19009720	19009734	act	9
chr01	19009782	19009800	DEL	chr01	19009778	19009837	gag	54
chr01	19009782	19009800	DEL	chr01	19009783	19009860	ggc	54
chr01	19959774	19959783	DEL	chr01	19959768	19959800	ccg	27
chr01	19959774	19959783	DEL	chr01	19959775	19959816	gcc	27
chr01	20945693	20945714	DEL	chr01	20945672	20945740	cga	63
chr01	20945693	20945714	DEL	chr01	20945728	20945796	gcg	63
chr01	21138939	21138942	DEL	chr01	21138936	21138950	cgg	9
chr01	21195499	21195508	DEL	chr01	21195500	21195541	gcg	27
chr01	21903201	21903207	DEL	chr01	21903199	21903222	gcg	18
chr01	22561621	22561624	DEL	chr01	22561618	22561632	aga	9
chr01	22823093	22823099	DEL	chr01	22823087	22823116	agg	18
chr01	22823096	22823099	DEL	chr01	22823093	22823107	agg	9
chr01	22931979	22931991	DEL	chr01	22931982	22932038	ctc	36
chr01	22931981	22931990	DEL	chr01	22931982	22932023	ctc	27
chr01	22948218	22948221	DEL	chr01	22948215	22948229	gcc	9
chr01	22948240	22948255	DEL	chr01	22948226	22948276	cct	45
chr01	22948240	22948255	DEL	chr01	22948232	22948282	ccg	45
chr01	22948240	22948255	DEL	chr01	22948256	22948306	cgg	45
chr01	22983112	22983115	DEL	chr01	22983109	22983123	gcc	9
chr01	22988246	22988252	DEL	chr01	22988240	22988263	ctc	18
chr01	22988246	22988252	DEL	chr01	22988247	22988273	tcc	18
chr01	23090768	23090777	DEL	chr01	23090775	23090807	ctc	27
chr01	23333035	23333038	DEL	chr01	23333032	23333046	cct	9
chr01	23363838	23363844	DEL	chr01	23363832	23363855	acc	18
chr01	23363838	23363844	DEL	chr01	23363839	23363865	cgg	18
chr01	23569798	23569801	DEL	chr01	23569795	23569809	acc	9
chr01	23607380	23607389	DEL	chr01	23607380	23607412	cca	27
chr01	23607380	23607389	DEL	chr01	23607384	23607422	cag	27
chr01	23607390	23607399	DEL	chr01	23607384	23607425	cag	27
chr01	23888120	23888132	DEL	chr01	23888116	23888163	gcggag	36
chr01	23888120	23888132	DEL	chr01	23888127	23888177	ggc	36
chr01	24145941	24145953	DEL	chr01	24145938	24145979	aag	36
chr01	24153990	24154008	DEL	chr01	24153973	24154032	cat	54
chr01	24153990	24154008	DEL	chr01	24153985	24154050	cggcga	54
chr01	24153990	24154008	DEL	chr01	24153997	24154074	cgg	54
chr01	24153996	24154002	DEL	chr01	24153990	24154019	acggcg	18
chr01	24153996	24154002	DEL	chr01	24153997	24154023	cgg	18
chr01	24162530	24162536	DEL	chr01	24162524	24162553	cgg	18
chr01	24162533	24162536	DEL	chr01	24162530	24162544	cgg	9
chr01	24360386	24360392	DEL	chr01	24360380	24360406	tgg	18
chr01	24360386	24360392	DEL	chr01	24360387	24360413	ggc	18
chr01	24396718	24396727	DEL	chr01	24396709	24396747	gccgcg	27
chr01	24396718	24396727	DEL	chr01	24396718	24396753	gcg	27
chr01	24396718	24396727	DEL	chr01	24396728	24396760	cgg	27
chr01	24396736	24396745	DEL	chr01	24396727	24396771	acggcggcg	27
chr01	24396736	24396745	DEL	chr01	24396728	24396760	cgg	27
chr01	24396736	24396745	DEL	chr01	24396737	24396778	cgg	27
chr01	24768194	24768200	DEL	chr01	24768195	24768221	gag	18
chr01	24788137	24788140	DEL	chr01	24788134	24788148	gag	9
chr01	24808602	24808620	DEL	chr01	24808588	24808647	gcg	54
chr01	25009553	25009559	DEL	chr01	25009548	25009571	tct	18
chr01	25009553	25009559	DEL	chr01	25009554	25009580	gga	18
chr01	26628995	26629001	DEL	chr01	26628996	26629022	gaa	18
chr01	26788588	26788591	DEL	chr01	26788585	26788599	gga	9
chr01	27109953	27109959	DEL	chr01	27109947	27109970	gct	18
chr01	27109953	27109959	DEL	chr01	27109954	27109980	gct	18
chr01	27341909	27341912	DEL	chr01	27341906	27341920	agt	9
chr01	27666748	27666760	DEL	chr01	27666736	27666780	gag	36
chr01	27666748	27666760	DEL	chr01	27666755	27666802	gagttg	36
chr01	27671561	27671573	DEL	chr01	27671555	27671596	gga	36
chr01	27671561	27671573	DEL	chr01	27671562	27671618	gag	36
chr01	27747896	27747899	DEL	chr01	27747893	27747907	tga	9
chr01	27852545	27852548	DEL	chr01	27852542	27852556	aga	9
chr01	27883067	27883070	DEL	chr01	27883064	27883078	cct	9
chr01	28126653	28126668	DEL	chr01	28126647	28126697	cgc	45
chr01	28126653	28126668	DEL	chr01	28126657	28126707	cgc	45
chr01	28187879	28187894	DEL	chr01	28187889	28187939	cga	45
chr01	28196698	28196707	DEL	chr01	28196697	28196729	gga	27
chr01	28231458	28231476	DEL	chr01	28231473	28231532	tcc	54
chr01	28231458	28231476	DEL	chr01	28231477	28231545	ccg	54
chr01	28282860	28282863	DEL	chr01	28282857	28282871	tct	9
chr01	28364131	28364140	DEL	chr01	28364123	28364158	ccg	27
chr01	28364131	28364140	DEL	chr01	28364127	28364165	cgccgg	27
chr01	28364131	28364140	DEL	chr01	28364142	28364174	cgg	27
chr01	28567591	28567600	DEL	chr01	28567592	28567633	cct	27
chr01	28655903	28655906	DEL	chr01	28655900	28655914	cgg	9
chr01	28660429	28660438	DEL	chr01	28660432	28660464	cgc	27
chr01	28660429	28660438	DEL	chr01	28660441	28660473	cgc	27
chr01	28921548	28921551	DEL	chr01	28921545	28921559	cca	9
chr01	29209528	29209543	DEL	chr01	29209543	29209593	agc	45
chr01	29209528	29209543	DEL	chr01	29209551	29209601	gag	45
chr01	29431709	29431718	DEL	chr01	29431706	29431738	gcc	27
chr01	29431709	29431718	DEL	chr01	29431710	29431751	cct	27
chr01	29458650	29458656	DEL	chr01	29458652	29458675	tcg	18
chr01	29560415	29560433	DEL	chr01	29560420	29560479	ctc	54
chr01	29735044	29735047	DEL	chr01	29735041	29735055	gaa	9
chr01	29830164	29830176	DEL	chr01	29830165	29830218	agtcca	36
chr01	29971374	29971389	DEL	chr01	29971360	29971410	gga	45
chr01	29971374	29971389	DEL	chr01	29971391	29971441	cgc	45
chr01	30042572	30042578	DEL	chr01	30042572	30042595	acg	18
chr01	30117179	30117185	DEL	chr01	30117180	30117206	ggt	18
chr01	30159707	30159722	DEL	chr01	30159697	30159747	cgc	45
chr01	30159707	30159722	DEL	chr01	30159711	30159761	gag	45
chr01	30159707	30159722	DEL	chr01	30159716	30159766	gag	45
chr01	30159707	30159722	DEL	chr01	30159721	30159771	gag	45
chr01	30159707	30159722	DEL	chr01	30159726	30159776	gag	45
chr01	30159707	30159722	DEL	chr01	30159731	30159781	gag	45
chr01	30159730	30159736	DEL	chr01	30159726	30159749	gag	18
chr01	30159730	30159736	DEL	chr01	30159731	30159757	gag	18
chr01	30166030	30166042	DEL	chr01	30166031	30166084	ccctca	36
chr01	30460076	30460085	DEL	chr01	30460080	30460112	gga	27
chr01	30738783	30738789	DEL	chr01	30738784	30738810	aga	18
chr01	30886301	30886313	DEL	chr01	30886297	30886341	ttc	36
chr01	31013914	31013920	DEL	chr01	31013908	31013937	cct	18
chr01	31013914	31013920	DEL	chr01	31013920	31013943	tcc	18
chr01	31013917	31013920	DEL	chr01	31013914	31013928	cct	9
chr01	31099438	31099441	DEL	chr01	31099435	31099449	aga	9
chr01	31575726	31575735	DEL	chr01	31575732	31575770	ccg	27
chr01	31599248	31599257	DEL	chr01	31599249	31599290	cgc	27
chr01	31689825	31689840	DEL	chr01	31689826	31689882	gcggag	45
chr01	31689825	31689840	DEL	chr01	31689837	31689896	ggc	45
chr01	31689836	31689845	DEL	chr01	31689827	31689865	cggagg	27
chr01	31689836	31689845	DEL	chr01	31689837	31689878	ggc	27
chr01	32026309	32026318	DEL	chr01	32026310	32026351	cct	27
chr01	32130690	32130708	DEL	chr01	32130682	32130744	cct	54
chr01	32367772	32367778	DEL	chr01	32367773	32367799	tcc	18
chr01	32390439	32390448	DEL	chr01	32390440	32390481	gcg	27
chr01	32819347	32819350	DEL	chr01	32819344	32819358	cag	9
chr01	32893383	32893392	DEL	chr01	32893390	32893422	gag	27
chr01	32893392	32893404	DEL	chr01	32893384	32893437	gagagagag	36
chr01	32893392	32893404	DEL	chr01	32893390	32893431	gag	36
chr01	32996856	32996865	DEL	chr01	32996857	32996898	ccg	27
chr01	33182631	33182637	DEL	chr01	33182625	33182648	cac	18
chr01	33932862	33932871	DEL	chr01	33932853	33932891	aagcgg	27
chr01	33932862	33932871	DEL	chr01	33932861	33932896	gcg	27
chr01	33932862	33932871	DEL	chr01	33932866	33932904	ggcgga	27
chr01	33932865	33932871	DEL	chr01	33932861	33932887	gcg	18
chr01	33960002	33960011	DEL	chr01	33960003	33960044	ggc	27
chr01	34379145	34379148	DEL	chr01	34379142	34379156	act	9
chr01	34531848	34531863	DEL	chr01	34531864	34531914	cct	45
chr01	34564228	34564231	DEL	chr01	34564225	34564239	ggc	9
chr01	34574902	34574908	DEL	chr01	34574903	34574929	tcc	18
chr01	34694319	34694337	DEL	chr01	34694304	34694369	cac	54
chr01	34694319	34694337	DEL	chr01	34694320	34694400	gct	54
chr01	34780827	34780830	DEL	chr01	34780824	34780838	cct	9
chr01	35122945	35122948	DEL	chr01	35122942	35122956	aca	9
chr01	35327088	35327100	DEL	chr01	35327078	35327119	ctc	36
chr01	35327088	35327100	DEL	chr01	35327092	35327136	cgg	36
chr01	35348013	35348016	DEL	chr01	35348010	35348024	cct	9
chr01	35713619	35713628	DEL	chr01	35713611	35713643	acc	27
chr01	35713619	35713628	DEL	chr01	35713620	35713661	agc	27
chr01	35767611	35767623	DEL	chr01	35767612	35767665	cgcctc	36
chr01	36007432	36007441	DEL	chr01	36007433	36007474	cgc	27
chr01	37529017	37529026	DEL	chr01	37529009	37529041	gcc	27
chr01	37529017	37529026	DEL	chr01	37529018	37529059	gcc	27
chr01	37535991	37536003	DEL	chr01	37535984	37536025	ctc	36
chr01	37535991	37536003	DEL	chr01	37535992	37536048	ctt	36
chr01	37689406	37689415	DEL	chr01	37689408	37689440	gct	27
chr01	37689406	37689415	DEL	chr01	37689413	37689448	tgg	27
chr01	37852675	37852684	DEL	chr01	37852676	37852717	gcc	27
chr01	37897380	37897395	DEL	chr01	37897381	37897446	cgc	45
chr01	38228361	38228364	DEL	chr01	38228358	38228372	agc	9
chr01	38300114	38300123	DEL	chr01	38300105	38300149	ccgtcg	27
chr01	38300114	38300123	DEL	chr01	38300121	38300153	cgc	27
chr01	38475155	38475161	DEL	chr01	38475149	38475178	gcctcc	18
chr01	38475155	38475161	DEL	chr01	38475156	38475182	cct	18
chr01	38475186	38475189	DEL	chr01	38475183	38475197	cct	9
chr01	38475702	38475711	DEL	chr01	38475698	38475736	ggc	27
chr01	38475702	38475711	DEL	chr01	38475712	38475744	cgg	27
chr01	38475705	38475711	DEL	chr01	38475699	38475728	gcg	18
chr01	38475711	38475720	DEL	chr01	38475702	38475737	gcg	27
chr01	38475711	38475720	DEL	chr01	38475712	38475744	cgg	27
chr01	38475711	38475720	DEL	chr01	38475718	38475750	cgc	27
chr01	38635568	38635577	DEL	chr01	38635569	38635610	gcg	27
chr01	38650590	38650614	DEL	chr01	38650575	38650652	gcc	72
chr01	38650590	38650614	DEL	chr01	38650590	38650679	ggc	72
chr01	38650590	38650614	DEL	chr01	38650606	38650686	gcc	72
chr01	38650590	38650614	DEL	chr01	38650615	38650695	gcg	72
chr01	38916178	38916184	DEL	chr01	38916180	38916206	ctg	18
chr01	38916179	38916185	DEL	chr01	38916180	38916206	ctg	18
chr01	38960182	38960197	DEL	chr01	38960167	38960217	gtc	45
chr01	38960182	38960197	DEL	chr01	38960173	38960226	ggt	45
chr01	38960182	38960197	DEL	chr01	38960182	38960232	gga	45
chr01	38960182	38960197	DEL	chr01	38960191	38960241	cgg	45
chr01	38986716	38986725	DEL	chr01	38986717	38986758	ccg	27
chr01	38993729	38993738	DEL	chr01	38993730	38993771	cgc	27
chr01	39000729	39000738	DEL	chr01	39000730	39000771	cgc	27
chr01	39095224	39095230	DEL	chr01	39095218	39095247	tcg	18
chr01	39095224	39095230	DEL	chr01	39095228	39095251	cgg	18
chr01	39211354	39211366	DEL	chr01	39211355	39211408	cctccg	36
chr01	39670852	39670858	DEL	chr01	39670850	39670873	tag	18
chr01	39897663	39897669	DEL	chr01	39897666	39897689	agt	18
chr01	39897669	39897672	DEL	chr01	39897666	39897680	agt	9
chr01	40073691	40073694	DEL	chr01	40073688	40073702	cga	9
chr01	40142644	40142647	DEL	chr01	40142641	40142655	atc	9
chr01	40409499	40409502	DEL	chr01	40409496	40409510	tgg	9
chr01	40654273	40654282	DEL	chr01	40654264	40654296	ctg	27
chr01	40654273	40654282	DEL	chr01	40654274	40654315	gcc	27
chr01	40679591	40679606	DEL	chr01	40679579	40679632	gct	45
chr01	40679591	40679606	DEL	chr01	40679592	40679642	ctc	45
chr01	40679591	40679606	DEL	chr01	40679597	40679647	ctc	45
chr01	40679591	40679606	DEL	chr01	40679602	40679652	ctc	45
chr01	40679591	40679606	DEL	chr01	40679607	40679657	ctc	45
chr01	40679591	40679606	DEL	chr01	40679612	40679662	ctc	45
chr01	40750796	40750799	DEL	chr01	40750793	40750807	aga	9
chr01	40861857	40861866	DEL	chr01	40861850	40861882	aat	27
chr01	40861857	40861866	DEL	chr01	40861859	40861891	tcg	27
chr01	40861857	40861866	DEL	chr01	40861868	40861900	tcg	27
chr01	41052430	41052442	DEL	chr01	41052431	41052475	gcg	36
chr01	41052430	41052442	DEL	chr01	41052443	41052487	gcg	36
chr01	41052433	41052442	DEL	chr01	41052431	41052466	gcg	27
chr01	41052433	41052442	DEL	chr01	41052443	41052475	gcg	27
chr01	41143356	41143365	DEL	chr01	41143351	41143383	agc	27
chr01	41143356	41143365	DEL	chr01	41143357	41143398	gcg	27
chr01	41143366	41143378	DEL	chr01	41143357	41143410	gcg	36
chr01	41143372	41143378	DEL	chr01	41143366	41143392	gcg	18
chr01	41314454	41314457	DEL	chr01	41314451	41314465	act	9
chr01	41314475	41314478	DEL	chr01	41314472	41314486	gct	9
chr01	41825015	41825024	DEL	chr01	41825006	41825041	ccg	27
chr01	41825015	41825024	DEL	chr01	41825016	41825051	cgc	27
chr01	41825015	41825024	DEL	chr01	41825023	41825055	gct	27
chr01	41839971	41839983	DEL	chr01	41839972	41840025	gcagaa	36
chr01	41853855	41853879	DEL	chr01	41853890	41853967	ata	72
chr01	41880488	41880497	DEL	chr01	41880481	41880513	gcg	27
chr01	41880488	41880497	DEL	chr01	41880489	41880530	ggc	27
chr01	42562876	42562882	DEL	chr01	42562877	42562903	gcc	18
chr01	42600580	42600586	DEL	chr01	42600575	42600598	tct	18
chr01	42600580	42600586	DEL	chr01	42600581	42600607	tcc	18
chr01	42614810	42614816	DEL	chr01	42614811	42614837	gcg	18
chr01	42621878	42621881	DEL	chr01	42621875	42621889	aag	9
chr01	42679295	42679313	DEL	chr01	42679324	42679383	tgg	54
chr01	42684972	42684984	DEL	chr01	42684963	42685004	cca	36
chr01	42684972	42684984	DEL	chr01	42684980	42685021	gag	36
chr01	42698960	42698972	DEL	chr01	42698948	42698989	gcg	36
chr01	42698960	42698972	DEL	chr01	42698977	42699018	ggt	36
chr01	42699005	42699008	DEL	chr01	42699002	42699016	gga	9
chr01	42701237	42701240	DEL	chr01	42701234	42701248	gcg	9
chr01	42742167	42742170	DEL	chr01	42742164	42742178	tct	9
chr01	42757078	42757090	DEL	chr01	42757079	42757132	gggagc	36
chr01	42778573	42778576	DEL	chr01	42778570	42778584	ccg	9
chr01	42949455	42949467	DEL	chr01	42949447	42949491	tcc	36
chr01	42949455	42949467	DEL	chr01	42949456	42949500	tcg	36
chr01	42949455	42949467	DEL	chr01	42949467	42949511	gtc	36
chr01	43080350	43080356	DEL	chr01	43080346	43080369	cat	18
chr01	43141895	43141901	DEL	chr01	43141896	43141922	agt	18
chr01	43162755	43162758	DEL	chr01	43162752	43162766	gcg	9
chr01	43166892	43166907	DEL	chr01	43166892	43166942	caa	45
chr01	43166892	43166907	DEL	chr01	43166896	43166958	aag	45
chr01	43166892	43166907	DEL	chr01	43166909	43166965	agaagg	45
chr01	43166895	43166907	DEL	chr01	43166892	43166933	caa	36
chr01	43166895	43166907	DEL	chr01	43166896	43166949	aag	36
chr01	43215215	43215227	DEL	chr01	43215216	43215272	aag	36
chr02	55784	55796	DEL	chr02	55782	55823	ctc	36
chr02	130132	130135	DEL	chr02	130129	130143	cgg	9
chr02	185212	185227	DEL	chr02	185217	185267	gag	45
chr02	185212	185227	DEL	chr02	185222	185272	gag	45
chr02	185212	185227	DEL	chr02	185227	185277	gag	45
chr02	185212	185227	DEL	chr02	185232	185282	gag	45
chr02	221684	221702	DEL	chr02	221693	221752	gtt	54
chr02	261421	261427	DEL	chr02	261419	261442	ctg	18
chr02	265876	265885	DEL	chr02	265877	265918	cgc	27
chr02	449724	449727	DEL	chr02	449721	449735	cgg	9
chr02	548150	548180	DEL	chr02	548176	548292	gattgggga	90
chr02	842564	842567	DEL	chr02	842561	842575	tcc	9
chr02	890369	890378	DEL	chr02	890370	890411	ccg	27
chr02	906574	906577	DEL	chr02	906571	906585	cta	9
chr02	1039655	1039661	DEL	chr02	1039656	1039682	cgg	18
chr02	1040563	1040578	DEL	chr02	1040552	1040602	cac	45
chr02	1040563	1040578	DEL	chr02	1040558	1040608	cgg	45
chr02	1040563	1040578	DEL	chr02	1040564	1040632	cca	45
chr02	1084224	1084230	DEL	chr02	1084220	1084246	gga	18
chr02	1084224	1084230	DEL	chr02	1084228	1084251	aga	18
chr02	1084228	1084234	DEL	chr02	1084222	1084245	agg	18
chr02	1084228	1084234	DEL	chr02	1084228	1084251	aga	18
chr02	1084228	1084234	DEL	chr02	1084232	1084255	gag	18
chr02	1084231	1084234	DEL	chr02	1084228	1084242	aga	9
chr02	1132498	1132510	DEL	chr02	1132499	1132552	aaagag	36
chr02	1214031	1214040	DEL	chr02	1214022	1214066	cgaagc	27
chr02	1214031	1214040	DEL	chr02	1214038	1214070	gcc	27
chr02	1443909	1443912	DEL	chr02	1443906	1443920	tct	9
chr02	1447175	1447181	DEL	chr02	1447171	1447194	cac	18
chr02	1447175	1447181	DEL	chr02	1447176	1447202	cct	18
chr02	1447184	1447193	DEL	chr02	1447176	1447211	cct	27
chr02	1447184	1447193	DEL	chr02	1447182	1447226	cctccg	27
chr02	1468185	1468197	DEL	chr02	1468186	1468242	cgg	36
chr02	1474603	1474612	DEL	chr02	1474604	1474645	ccg	27
chr02	1553351	1553357	DEL	chr02	1553345	1553374	cggtgg	18
chr02	1594603	1594606	DEL	chr02	1594600	1594614	tct	9
chr02	1697129	1697141	DEL	chr02	1697126	1697170	gga	36
chr02	1697129	1697141	DEL	chr02	1697135	1697176	gat	36
chr02	1697129	1697141	DEL	chr02	1697142	1697183	gag	36
chr02	1743216	1743219	DEL	chr02	1743213	1743227	gct	9
chr02	1819024	1819036	DEL	chr02	1819021	1819062	gcg	36
chr02	1819024	1819036	DEL	chr02	1819025	1819078	cggaga	36
chr02	1903082	1903094	DEL	chr02	1903083	1903139	ccg	36
chr02	1949348	1949357	DEL	chr02	1949349	1949390	gcg	27
chr02	2092937	2092949	DEL	chr02	2092928	2092969	ccg	36
chr02	2092937	2092949	DEL	chr02	2092938	2092988	cgc	36
chr02	2166567	2166585	DEL	chr02	2166583	2166648	cgc	54
chr02	2331747	2331756	DEL	chr02	2331738	2331782	cgc	27
chr02	2331747	2331756	DEL	chr02	2331757	2331789	gcc	27
chr02	2369575	2369587	DEL	chr02	2369592	2369633	gcc	36
chr02	2486504	2486513	DEL	chr02	2486509	2486541	ctc	27
chr02	2486511	2486517	DEL	chr02	2486509	2486532	ctc	18
chr02	2646325	2646328	DEL	chr02	2646322	2646336	aga	9
chr02	2728934	2728937	DEL	chr02	2728931	2728945	tcc	9
chr02	2744270	2744273	DEL	chr02	2744267	2744281	ttc	9
chr02	2791300	2791309	DEL	chr02	2791300	2791335	ctc	27
chr02	2791300	2791309	DEL	chr02	2791310	2791342	tcc	27
chr02	2807609	2807612	DEL	chr02	2807606	2807620	cgg	9
chr02	2865094	2865109	DEL	chr02	2865087	2865137	cca	45
chr02	2865094	2865109	DEL	chr02	2865095	2865166	cgc	45
chr02	2882065	2882077	DEL	chr02	2882066	2882122	ctc	36
chr02	2995555	2995564	DEL	chr02	2995560	2995592	gaa	27
chr02	3179579	3179588	DEL	chr02	3179570	3179602	cgc	27
chr02	3179579	3179588	DEL	chr02	3179575	3179607	cgc	27
chr02	3179579	3179588	DEL	chr02	3179580	3179621	cgc	27
chr02	3386357	3386363	DEL	chr02	3386351	3386380	ggggga	18
chr02	3679891	3679906	DEL	chr02	3679890	3679940	gcg	45
chr02	3679891	3679906	DEL	chr02	3679895	3679945	gcg	45
chr02	3679891	3679906	DEL	chr02	3679900	3679950	gcg	45
chr02	3720085	3720094	DEL	chr02	3720086	3720127	cgg	27
chr02	3796648	3796663	DEL	chr02	3796649	3796702	ggc	45
chr02	3796648	3796663	DEL	chr02	3796659	3796721	gcg	45
chr02	4024741	4024759	DEL	chr02	4024723	4024782	tcc	54
chr02	4140370	4140376	DEL	chr02	4140364	4140387	gac	18
chr02	4140370	4140376	DEL	chr02	4140371	4140397	acg	18
chr02	4147009	4147015	DEL	chr02	4147003	4147026	ggc	18
chr02	4175305	4175320	DEL	chr02	4175312	4175374	gagagagag	45
chr02	4175305	4175320	DEL	chr02	4175318	4175368	gag	45
chr02	4175305	4175320	DEL	chr02	4175327	4175377	gag	45
chr02	4175311	4175320	DEL	chr02	4175318	4175350	gag	27
chr02	4384229	4384232	DEL	chr02	4384226	4384240	cct	9
chr02	4423176	4423182	DEL	chr02	4423170	4423196	ctt	18
chr02	4457719	4457725	DEL	chr02	4457717	4457740	aga	18
chr02	4460380	4460389	DEL	chr02	4460381	4460422	cgc	27
chr02	4563053	4563059	DEL	chr02	4563050	4563073	tct	18
chr02	4563053	4563059	DEL	chr02	4563054	4563080	ctc	18
chr02	4634508	4634520	DEL	chr02	4634505	4634546	cgc	36
chr02	4634508	4634520	DEL	chr02	4634509	4634565	gcg	36
chr02	4831241	4831244	DEL	chr02	4831238	4831252	ctc	9
chr02	4859059	4859068	DEL	chr02	4859060	4859101	tgg	27
chr02	5043322	5043328	DEL	chr02	5043316	5043339	agg	18
chr02	5043322	5043328	DEL	chr02	5043323	5043349	gga	18
chr02	5047060	5047066	DEL	chr02	5047054	5047077	cgt	18
chr02	5047060	5047066	DEL	chr02	5047061	5047087	gcg	18
chr02	5347437	5347449	DEL	chr02	5347425	5347466	gtg	36
chr02	5347437	5347449	DEL	chr02	5347435	5347476	ctc	36
chr02	5491781	5491790	DEL	chr02	5491775	5491807	cgg	27
chr02	5491781	5491790	DEL	chr02	5491779	5491811	ggt	27
chr02	5491781	5491790	DEL	chr02	5491785	5491817	ggc	27
chr02	5519908	5519920	DEL	chr02	5519906	5519947	gac	36
chr02	5519908	5519920	DEL	chr02	5519925	5519966	gtc	36
chr02	5758055	5758058	DEL	chr02	5758052	5758066	gga	9
chr02	5841849	5841858	DEL	chr02	5841849	5841881	ctc	27
chr02	5923572	5923584	DEL	chr02	5923560	5923601	tct	36
chr02	5923572	5923584	DEL	chr02	5923573	5923614	gaa	36
chr02	5923572	5923584	DEL	chr02	5923582	5923626	gaa	36
chr02	6062375	6062381	DEL	chr02	6062376	6062402	cgt	18
chr02	6404029	6404038	DEL	chr02	6404040	6404072	atc	27
chr02	6441650	6441665	DEL	chr02	6441643	6441693	gcg	45
chr02	6441650	6441665	DEL	chr02	6441647	6441697	cgc	45
chr02	6568216	6568222	DEL	chr02	6568217	6568243	cgc	18
chr02	6588212	6588224	DEL	chr02	6588211	6588252	gag	36
chr02	6599308	6599314	DEL	chr02	6599302	6599325	gcg	18
chr02	6599308	6599314	DEL	chr02	6599309	6599335	cgg	18
chr02	6915424	6915427	DEL	chr02	6915421	6915435	tct	9
chr02	6956630	6956636	DEL	chr02	6956627	6956653	tct	18
chr02	6956630	6956636	DEL	chr02	6956634	6956657	ctc	18
chr02	6956633	6956639	DEL	chr02	6956627	6956653	tct	18
chr02	6956633	6956639	DEL	chr02	6956634	6956660	ctc	18
chr02	6979560	6979563	DEL	chr02	6979557	6979571	gcc	9
chr02	7138001	7138013	DEL	chr02	7138002	7138055	tggtga	36
chr02	7260323	7260338	DEL	chr02	7260324	7260392	gcg	45
chr02	7321475	7321484	DEL	chr02	7321476	7321517	cgc	27
chr02	8343137	8343149	DEL	chr02	8343127	8343177	gcg	36
chr02	8343137	8343149	DEL	chr02	8343138	8343185	ggcggt	36
chr02	8343137	8343149	DEL	chr02	8343150	8343194	ggc	36
chr02	8358871	8358874	DEL	chr02	8358868	8358882	gcc	9
chr02	8558096	8558108	DEL	chr02	8558084	8558131	ccgctg	36
chr02	8558096	8558108	DEL	chr02	8558095	8558142	gcc	36
chr02	8730608	8730614	DEL	chr02	8730610	8730636	tcc	18
chr02	8769206	8769212	DEL	chr02	8769207	8769233	cgc	18
chr02	9518258	9518273	DEL	chr02	9518246	9518296	gaa	45
chr02	9523736	9523745	DEL	chr02	9523727	9523765	tcc	27
chr02	9523736	9523745	DEL	chr02	9523740	9523778	ccg	27
chr02	9893560	9893569	DEL	chr02	9893561	9893602	cgg	27
chr02	9993980	9993986	DEL	chr02	9993981	9994007	ctt	18
chr02	10634693	10634696	DEL	chr02	10634690	10634704	tct	9
chr02	10701454	10701463	DEL	chr02	10701455	10701496	cgc	27
chr02	10716659	10716668	DEL	chr02	10716660	10716701	cgg	27
chr02	11116199	11116205	DEL	chr02	11116195	11116218	tcc	18
chr02	11151822	11151837	DEL	chr02	11151841	11151894	ttg	45
chr02	11151840	11151849	DEL	chr02	11151841	11151882	ttg	27
chr02	11876404	11876413	DEL	chr02	11876405	11876446	cgc	27
chr02	12382290	12382293	DEL	chr02	12382287	12382301	cgg	9
chr02	12464408	12464414	DEL	chr02	12464409	12464435	cct	18
chr02	13096138	13096141	DEL	chr02	13096135	13096149	taa	9
chr02	14982689	14982719	DEL	chr02	14982668	14982763	gag	90
chr02	14982689	14982719	DEL	chr02	14982698	14982793	agg	90
chr02	14982689	14982719	DEL	chr02	14982726	14982821	gga	90
chr02	14982689	14982719	DEL	chr02	14982736	14982831	gcg	90
chr02	15446089	15446095	DEL	chr02	15446093	15446116	cgg	18
chr02	15726536	15726557	DEL	chr02	15726518	15726586	cgg	63
chr02	15726536	15726557	DEL	chr02	15726528	15726599	gtc	63
chr02	15726536	15726557	DEL	chr02	15726545	15726613	cgg	63
chr02	15726536	15726557	DEL	chr02	15726566	15726634	cgg	63
chr02	16440301	16440307	DEL	chr02	16440302	16440328	ccg	18
chr02	17416414	17416417	DEL	chr02	17416411	17416425	agc	9
chr02	17846298	17846307	DEL	chr02	17846299	17846340	ccg	27
chr02	17846314	17846332	DEL	chr02	17846299	17846379	ccg	54
chr02	17846314	17846332	DEL	chr02	17846327	17846386	ccg	54
chr02	17846314	17846332	DEL	chr02	17846333	17846392	cgc	54
chr02	17846320	17846332	DEL	chr02	17846308	17846361	ccg	36
chr02	17846320	17846332	DEL	chr02	17846327	17846368	ccg	36
chr02	17846320	17846332	DEL	chr02	17846333	17846374	cgc	36
chr02	18235679	18235691	DEL	chr02	18235677	18235724	ccg	36
chr02	18235679	18235691	DEL	chr02	18235692	18235736	ccg	36
chr02	18385233	18385239	DEL	chr02	18385234	18385260	ccg	18
chr02	18573116	18573125	DEL	chr02	18573124	18573156	cgc	27
chr02	18831703	18831712	DEL	chr02	18831704	18831745	gga	27
chr02	18859257	18859287	DEL	chr02	18859247	18859342	act	90
chr02	18859257	18859287	DEL	chr02	18859271	18859366	cca	90
chr02	18859257	18859287	DEL	chr02	18859298	18859396	ccg	90
chr02	18859257	18859287	DEL	chr02	18859309	18859404	cct	90
chr02	18861486	18861504	DEL	chr02	18861468	18861527	ata	54
chr02	18861486	18861504	DEL	chr02	18861487	18861546	agc	54
chr02	19273114	19273117	DEL	chr02	19273111	19273125	aga	9
chr02	19342065	19342083	DEL	chr02	19342066	19342149	tct	54
chr02	19420674	19420680	DEL	chr02	19420675	19420701	ctt	18
chr02	19921027	19921042	DEL	chr02	19921015	19921065	cgc	45
chr02	19921027	19921042	DEL	chr02	19921019	19921069	gct	45
chr02	19921027	19921042	DEL	chr02	19921024	19921074	tcg	45
chr02	19921027	19921042	DEL	chr02	19921028	19921099	cgg	45
chr02	19967897	19967903	DEL	chr02	19967898	19967924	gga	18
chr02	19983139	19983142	DEL	chr02	19983136	19983150	gga	9
chr02	20109029	20109035	DEL	chr02	20109024	20109047	gct	18
chr02	20182280	20182286	DEL	chr02	20182281	20182307	ggc	18
chr02	20704933	20704939	DEL	chr02	20704934	20704960	aga	18
chr02	21050433	21050463	DEL	chr02	21050465	21050560	tgt	90
chr02	21061612	21061624	DEL	chr02	21061608	21061649	gcg	36
chr02	21061612	21061624	DEL	chr02	21061613	21061669	gag	36
chr02	21335503	21335515	DEL	chr02	21335502	21335543	caa	36
chr02	21335503	21335515	DEL	chr02	21335507	21335548	aac	36
chr02	21451267	21451282	DEL	chr02	21451268	21451318	ggc	45
chr02	21451267	21451282	DEL	chr02	21451279	21451335	cgg	45
chr02	21532716	21532722	DEL	chr02	21532716	21532739	cgg	18
chr02	21917443	21917449	DEL	chr02	21917444	21917470	cct	18
chr02	21986493	21986499	DEL	chr02	21986491	21986514	gtg	18
chr02	22150132	22150138	DEL	chr02	22150133	22150159	gag	18
chr02	22367244	22367256	DEL	chr02	22367244	22367291	gga	36
chr02	22367244	22367256	DEL	chr02	22367248	22367301	gaggaggaa	36
chr02	22367244	22367256	DEL	chr02	22367257	22367298	gag	36
chr02	22390422	22390425	DEL	chr02	22390419	22390433	aag	9
chr02	22697697	22697700	DEL	chr02	22697694	22697708	agt	9
chr02	22697707	22697716	DEL	chr02	22697698	22697742	gtg	27
chr02	22697707	22697716	DEL	chr02	22697717	22697749	tgg	27
chr02	22933439	22933460	DEL	chr02	22933420	22933488	cgg	63
chr02	22933439	22933460	DEL	chr02	22933435	22933506	cgg	63
chr02	22933439	22933460	DEL	chr02	22933440	22933514	gcggcc	63
chr02	22933439	22933460	DEL	chr02	22933455	22933523	cgt	63
chr02	22933439	22933460	DEL	chr02	22933461	22933532	gcg	63
chr02	22976530	22976542	DEL	chr02	22976521	22976562	ccg	36
chr02	22976530	22976542	DEL	chr02	22976530	22976574	gcc	36
chr02	22976530	22976542	DEL	chr02	22976543	22976587	ccg	36
chr02	22976533	22976542	DEL	chr02	22976530	22976565	gcc	27
chr02	22976533	22976542	DEL	chr02	22976543	22976575	ccg	27
chr02	23536886	23536892	DEL	chr02	23536881	23536904	aag	18
chr02	23664809	23664815	DEL	chr02	23664803	23664832	ccg	18
chr02	23745330	23745339	DEL	chr02	23745331	23745372	gcc	27
chr02	24268201	24268213	DEL	chr02	24268197	24268238	agc	36
chr02	24268201	24268213	DEL	chr02	24268201	24268242	gcg	36
chr02	24268207	24268219	DEL	chr02	24268197	24268238	agc	36
chr02	24268207	24268219	DEL	chr02	24268201	24268242	gcg	36
chr02	24268207	24268219	DEL	chr02	24268214	24268261	cggcgt	36
chr02	24276345	24276348	DEL	chr02	24276342	24276356	ttc	9
chr02	24477243	24477252	DEL	chr02	24477244	24477276	gcg	27
chr02	24477243	24477252	DEL	chr02	24477252	24477287	ggc	27
chr02	24501811	24501823	DEL	chr02	24501813	24501854	cgc	36
chr02	24501811	24501823	DEL	chr02	24501825	24501866	cgc	36
chr02	24733149	24733152	DEL	chr02	24733146	24733160	tga	9
chr02	24766879	24766885	DEL	chr02	24766885	24766908	gcc	18
chr02	24766882	24766903	DEL	chr02	24766861	24766929	gcc	63
chr02	24766882	24766903	DEL	chr02	24766865	24766933	cct	63
chr02	24766882	24766903	DEL	chr02	24766883	24766969	ccgccg	63
chr02	24766882	24766903	DEL	chr02	24766885	24766974	gcc	63
chr02	24879886	24879919	DEL	chr02	24879856	24879966	tgtttg	99
chr02	24879886	24879919	DEL	chr02	24879910	24880014	tgc	99
chr02	24879886	24879919	DEL	chr02	24879915	24880019	cgt	99
chr02	24879886	24879919	DEL	chr02	24879929	24880033	tgc	99
chr02	24899606	24899621	DEL	chr02	24899601	24899651	tct	45
chr02	24899606	24899621	DEL	chr02	24899609	24899659	ctc	45
chr02	24899606	24899621	DEL	chr02	24899614	24899664	ctc	45
chr02	24899606	24899621	DEL	chr02	24899619	24899669	ctc	45
chr02	24899606	24899621	DEL	chr02	24899624	24899674	ctc	45
chr02	24899606	24899621	DEL	chr02	24899629	24899679	ctc	45
chr02	25393029	25393032	DEL	chr02	25393026	25393040	cct	9
chr02	25576813	25576819	DEL	chr02	25576811	25576834	ctt	18
chr02	25665052	25665064	DEL	chr02	25665053	25665106	cgccct	36
chr02	25683543	25683555	DEL	chr02	25683544	25683597	ggcggt	36
chr02	25759889	25759904	DEL	chr02	25759890	25759940	ctc	45
chr02	25759889	25759904	DEL	chr02	25759901	25759963	cct	45
chr02	25885073	25885085	DEL	chr02	25885071	25885112	cgt	36
chr02	25885073	25885085	DEL	chr02	25885086	25885127	cgt	36
chr02	26320328	26320340	DEL	chr02	26320316	26320357	cgg	36
chr02	26320328	26320340	DEL	chr02	26320329	26320385	ggc	36
chr02	26550956	26550971	DEL	chr02	26550963	26551013	cac	45
chr02	26550956	26550971	DEL	chr02	26550970	26551020	cac	45
chr02	26620302	26620311	DEL	chr02	26620293	26620325	ttc	27
chr02	26620302	26620311	DEL	chr02	26620303	26620344	gcc	27
chr02	27228872	27228896	DEL	chr02	27228880	27228963	gagcga	72
chr02	27228872	27228896	DEL	chr02	27228900	27228977	aag	72
chr02	27269095	27269104	DEL	chr02	27269086	27269121	tgg	27
chr02	27269095	27269104	DEL	chr02	27269096	27269137	cgg	27
chr02	27386955	27386967	DEL	chr02	27386951	27386992	gac	36
chr02	27386955	27386967	DEL	chr02	27386964	27387008	gcc	36
chr02	27422964	27422979	DEL	chr02	27422965	27423036	cct	45
chr02	27995151	27995169	DEL	chr02	27995152	27995211	ccg	54
chr02	27995151	27995169	DEL	chr02	27995168	27995233	cgc	54
chr02	27995151	27995169	DEL	chr02	27995180	27995239	cgt	54
chr02	27995176	27995191	DEL	chr02	27995168	27995224	cgc	45
chr02	27995176	27995191	DEL	chr02	27995180	27995230	cgt	45
chr02	27995176	27995191	DEL	chr02	27995183	27995245	cgtcgc	45
chr02	28246507	28246519	DEL	chr02	28246522	28246566	cgt	36
chr02	28355599	28355605	DEL	chr02	28355594	28355617	gac	18
chr02	28362918	28362927	DEL	chr02	28362919	28362960	gcc	27
chr02	28481301	28481304	DEL	chr02	28481298	28481312	gga	9
chr02	28587905	28587932	DEL	chr02	28587922	28588014	tacaga	81
chr02	28587905	28587932	DEL	chr02	28587950	28588036	agt	81
chr02	28680844	28680847	DEL	chr02	28680841	28680855	cag	9
chr02	28701912	28701927	DEL	chr02	28701928	28701978	cct	45
chr02	28768866	28768872	DEL	chr02	28768860	28768889	tggagg	18
chr02	28768866	28768872	DEL	chr02	28768870	28768893	ggc	18
chr02	29069502	29069508	DEL	chr02	29069496	29069525	cct	18
chr02	29285023	29285029	DEL	chr02	29285024	29285050	ctc	18
chr02	29294589	29294598	DEL	chr02	29294582	29294614	cct	27
chr02	29294589	29294598	DEL	chr02	29294590	29294631	cgc	27
chr02	29468521	29468524	DEL	chr02	29468518	29468532	gcg	9
chr02	29625469	29625472	DEL	chr02	29625466	29625480	cta	9
chr02	29877256	29877262	DEL	chr02	29877250	29877279	cag	18
chr02	30011107	30011116	DEL	chr02	30011098	30011130	tcc	27
chr02	30011107	30011116	DEL	chr02	30011108	30011149	ccg	27
chr02	30159186	30159192	DEL	chr02	30159187	30159213	cgg	18
chr02	30199753	30199759	DEL	chr02	30199754	30199780	gag	18
chr02	30434000	30434006	DEL	chr02	30434000	30434023	cgg	18
chr02	30536316	30536319	DEL	chr02	30536313	30536327	aga	9
chr02	30699103	30699109	DEL	chr02	30699097	30699126	tccctc	18
chr02	30763173	30763182	DEL	chr02	30763168	30763206	gcc	27
chr02	31663122	31663131	DEL	chr02	31663123	31663164	ctc	27
chr02	31754682	31754688	DEL	chr02	31754683	31754709	ggc	18
chr02	32080370	32080376	DEL	chr02	32080369	32080392	cta	18
chr02	32303865	32303871	DEL	chr02	32303859	32303885	cgc	18
chr02	32533459	32533471	DEL	chr02	32533457	32533501	gga	36
chr02	32597588	32597597	DEL	chr02	32597592	32597630	gcg	27
chr02	32667958	32667964	DEL	chr02	32667964	32667987	agg	18
chr02	32918421	32918433	DEL	chr02	32918422	32918466	caa	36
chr02	32918421	32918433	DEL	chr02	32918433	32918477	aca	36
chr02	33078283	33078289	DEL	chr02	33078284	33078310	cct	18
chr02	33202626	33202638	DEL	chr02	33202614	33202655	ctt	36
chr02	33202626	33202638	DEL	chr02	33202627	33202674	ttttct	36
chr02	33430033	33430045	DEL	chr02	33430029	33430073	cgc	36
chr02	33430033	33430045	DEL	chr02	33430034	33430081	ccgcct	36
chr02	33546440	33546449	DEL	chr02	33546439	33546471	ccg	27
chr02	33546440	33546449	DEL	chr02	33546444	33546476	gcg	27
chr02	33762558	33762567	DEL	chr02	33762559	33762600	cgg	27
chr02	33762568	33762583	DEL	chr02	33762559	33762627	cgg	45
chr02	33762577	33762583	DEL	chr02	33762571	33762600	cgg	18
chr02	34209785	34209797	DEL	chr02	34209786	34209839	cggagg	36
chr02	34296383	34296392	DEL	chr02	34296384	34296425	ggc	27
chr02	34672996	34673008	DEL	chr02	34672984	34673025	cgt	36
chr02	34672996	34673008	DEL	chr02	34673013	34673054	tcc	36
chr02	34769722	34769731	DEL	chr02	34769713	34769751	atcacc	27
chr02	34769722	34769731	DEL	chr02	34769727	34769759	gtc	27
chr02	34900478	34900490	DEL	chr02	34900469	34900510	ccg	36
chr02	34900478	34900490	DEL	chr02	34900479	34900535	cgc	36
chr02	34911039	34911048	DEL	chr02	34911040	34911081	gcc	27
chr02	34920604	34920622	DEL	chr02	34920591	34920650	cga	54
chr02	34920604	34920622	DEL	chr02	34920608	34920670	cgc	54
chr02	34920604	34920622	DEL	chr02	34920614	34920679	cgccgt	54
chr02	34920604	34920622	DEL	chr02	34920626	34920688	cgc	54
chr02	34926726	34926735	DEL	chr02	34926717	34926761	ccg	27
chr02	34926726	34926735	DEL	chr02	34926736	34926768	ctc	27
chr02	34926732	34926735	DEL	chr02	34926729	34926743	ccg	9
chr02	35068062	35068065	DEL	chr02	35068059	35068073	cgg	9
chr02	35068064	35068070	DEL	chr02	35068058	35068081	gcg	18
chr02	35122666	35122675	DEL	chr02	35122667	35122708	cgg	27
chr02	35122899	35122902	DEL	chr02	35122896	35122910	cgc	9
chr02	35158985	35158997	DEL	chr02	35158976	35159017	ctt	36
chr02	35158985	35158997	DEL	chr02	35158985	35159026	ttc	36
chr02	35158985	35158997	DEL	chr02	35158993	35159043	gcc	36
chr02	35162652	35162661	DEL	chr02	35162653	35162694	tcc	27
chr02	35200900	35200927	DEL	chr02	35200883	35200969	gaa	81
chr02	35200900	35200927	DEL	chr02	35200899	35200985	aga	81
chr02	35200900	35200927	DEL	chr02	35200919	35201005	caa	81
chr02	35228561	35228573	DEL	chr02	35228571	35228612	gtg	36
chr02	35271639	35271648	DEL	chr02	35271642	35271674	gcg	27
chr02	35271639	35271648	DEL	chr02	35271651	35271683	gcg	27
chr02	35271641	35271653	DEL	chr02	35271640	35271693	ctgcggcgg	36
chr02	35271641	35271653	DEL	chr02	35271642	35271683	gcg	36
chr02	35271641	35271653	DEL	chr02	35271651	35271698	gcg	36
chr02	35271644	35271650	DEL	chr02	35271642	35271665	gcg	18
chr02	35271647	35271650	DEL	chr02	35271644	35271658	ggc	9
chr02	35335052	35335061	DEL	chr02	35335053	35335094	gct	27
chr02	35341781	35341787	DEL	chr02	35341775	35341798	gaa	18
chr02	35341788	35341794	DEL	chr02	35341782	35341811	tccatc	18
chr02	35349735	35349744	DEL	chr02	35349736	35349777	tcg	27
chr02	35427559	35427571	DEL	chr02	35427552	35427596	tcc	36
chr02	35427559	35427571	DEL	chr02	35427566	35427607	ctt	36
chr02	35483916	35483925	DEL	chr02	35483911	35483943	gga	27
chr02	35483916	35483925	DEL	chr02	35483917	35483958	ggc	27
chr02	35483922	35483937	DEL	chr02	35483911	35483961	gga	45
chr02	35483922	35483937	DEL	chr02	35483917	35483979	ggc	45
chr02	35483922	35483937	DEL	chr02	35483932	35483988	ggcggt	45
chr02	35483922	35483937	DEL	chr02	35483944	35483994	ggc	45
chr02	35483931	35483937	DEL	chr02	35483925	35483954	cgg	18
chr02	35642495	35642504	DEL	chr02	35642490	35642522	ggt	27
chr02	35642495	35642504	DEL	chr02	35642496	35642537	ggc	27
chr02	35677972	35677981	DEL	chr02	35677970	35678002	aga	27
chr02	35677972	35677981	DEL	chr02	35677976	35678008	agc	27
chr02	35677978	35677990	DEL	chr02	35677970	35678011	aga	36
chr02	35677978	35677990	DEL	chr02	35677976	35678017	agc	36
chr02	35677978	35677990	DEL	chr02	35677979	35678032	agcaga	36
chr02	35751276	35751279	DEL	chr02	35751273	35751287	aga	9
chr02	35854692	35854707	DEL	chr02	35854688	35854738	att	45
chr02	35854692	35854707	DEL	chr02	35854693	35854764	tcc	45
chr03	89129	89135	DEL	chr03	89124	89147	ggc	18
chr03	180111	180120	DEL	chr03	180104	180136	gta	27
chr03	180111	180120	DEL	chr03	180111	180146	act	27
chr03	208424	208433	DEL	chr03	208422	208454	gct	27
chr03	537698	537722	DEL	chr03	537687	537764	gag	72
chr03	537698	537722	DEL	chr03	537699	537791	gca	72
chr03	562578	562581	DEL	chr03	562575	562589	cgc	9
chr03	562586	562592	DEL	chr03	562580	562609	cgg	18
chr03	798062	798071	DEL	chr03	798063	798104	gcg	27
chr03	1015386	1015398	DEL	chr03	1015378	1015419	ttg	36
chr03	1015386	1015398	DEL	chr03	1015387	1015443	cgg	36
chr03	1318295	1318304	DEL	chr03	1318287	1318319	agg	27
chr03	1318295	1318304	DEL	chr03	1318296	1318337	cgc	27
chr03	1457521	1457539	DEL	chr03	1457508	1457567	agg	54
chr03	1562110	1562113	DEL	chr03	1562107	1562121	cag	9
chr03	1641612	1641615	DEL	chr03	1641609	1641623	act	9
chr03	1780777	1780783	DEL	chr03	1780771	1780800	gcg	18
chr03	1959744	1959750	DEL	chr03	1959745	1959771	ggt	18
chr03	2682341	2682350	DEL	chr03	2682332	2682364	cgc	27
chr03	2682341	2682350	DEL	chr03	2682340	2682375	ccg	27
chr03	2682341	2682350	DEL	chr03	2682351	2682383	gcc	27
chr03	2986072	2986081	DEL	chr03	2986073	2986114	cgg	27
chr03	3091891	3091909	DEL	chr03	3091877	3091936	gtg	54
chr03	3091891	3091909	DEL	chr03	3091882	3091941	gga	54
chr03	3091891	3091909	DEL	chr03	3091909	3091974	cggcga	54
chr03	3091891	3091909	DEL	chr03	3091921	3091980	cgg	54
chr03	3110791	3110797	DEL	chr03	3110792	3110818	gcc	18
chr03	3196603	3196606	DEL	chr03	3196600	3196614	tct	9
chr03	3833988	3833994	DEL	chr03	3833982	3834005	cag	18
chr03	3935692	3935698	DEL	chr03	3935687	3935710	gga	18
chr03	3935692	3935698	DEL	chr03	3935693	3935716	gag	18
chr03	3970246	3970252	DEL	chr03	3970241	3970264	ccg	18
chr03	3989950	3989953	DEL	chr03	3989947	3989961	gcg	9
chr03	3990147	3990153	DEL	chr03	3990141	3990164	gga	18
chr03	3990147	3990153	DEL	chr03	3990148	3990174	cgc	18
chr03	4439774	4439783	DEL	chr03	4439775	4439816	tcc	27
chr03	4525769	4525775	DEL	chr03	4525765	4525788	gca	18
chr03	4607004	4607016	DEL	chr03	4606998	4607039	gag	36
chr03	4607004	4607016	DEL	chr03	4607009	4607050	gaa	36
chr03	4705422	4705434	DEL	chr03	4705423	4705476	gcgtgg	36
chr03	4906254	4906269	DEL	chr03	4906241	4906291	cgc	45
chr03	4909729	4909750	DEL	chr03	4909733	4909801	cga	63
chr03	4909729	4909750	DEL	chr03	4909742	4909816	cgg	63
chr03	4909729	4909750	DEL	chr03	4909754	4909822	cgc	63
chr03	4909750	4909756	DEL	chr03	4909744	4909773	gcg	18
chr03	4909750	4909756	DEL	chr03	4909754	4909777	cgc	18
chr03	4945477	4945492	DEL	chr03	4945478	4945546	gcc	45
chr03	5444214	5444232	DEL	chr03	5444241	5444300	gga	54
chr03	5489166	5489172	DEL	chr03	5489160	5489183	gga	18
chr03	5817891	5817894	DEL	chr03	5817888	5817902	tct	9
chr03	6041266	6041275	DEL	chr03	6041267	6041308	ctc	27
chr03	6354927	6354936	DEL	chr03	6354928	6354969	gct	27
chr03	6369547	6369568	DEL	chr03	6369542	6369610	ctt	63
chr03	6369547	6369568	DEL	chr03	6369556	6369624	tct	63
chr03	6493990	6493999	DEL	chr03	6493991	6494032	cgc	27
chr03	6957266	6957278	DEL	chr03	6957259	6957300	cgc	36
chr03	6957266	6957278	DEL	chr03	6957267	6957323	gga	36
chr03	6957328	6957331	DEL	chr03	6957325	6957339	cgg	9
chr03	7074768	7074777	DEL	chr03	7074769	7074810	ccg	27
chr03	7181185	7181197	DEL	chr03	7181186	7181242	ctt	36
chr03	7334933	7334942	DEL	chr03	7334924	7334968	ctt	27
chr03	7334933	7334942	DEL	chr03	7334943	7334975	ttc	27
chr03	7334939	7334942	DEL	chr03	7334936	7334950	ctt	9
chr03	7751464	7751470	DEL	chr03	7751461	7751487	gcc	18
chr03	8087214	8087223	DEL	chr03	8087210	8087242	agc	27
chr03	8087214	8087223	DEL	chr03	8087215	8087256	cgc	27
chr03	9458868	9458874	DEL	chr03	9458869	9458895	ggt	18
chr03	9628205	9628217	DEL	chr03	9628205	9628252	gga	36
chr03	9628205	9628217	DEL	chr03	9628218	9628262	gag	36
chr03	9628217	9628226	DEL	chr03	9628208	9628243	gga	27
chr03	9628217	9628226	DEL	chr03	9628218	9628256	gag	27
chr03	9843364	9843370	DEL	chr03	9843359	9843382	ctt	18
chr03	9843364	9843370	DEL	chr03	9843365	9843391	ctc	18
chr03	10324978	10324984	DEL	chr03	10324972	10324995	tcc	18
chr03	10324978	10324984	DEL	chr03	10324979	10325005	tcc	18
chr03	10372499	10372511	DEL	chr03	10372500	10372556	cgc	36
chr03	10549446	10549452	DEL	chr03	10549440	10549466	agg	18
chr03	10549446	10549452	DEL	chr03	10549450	10549473	agg	18
chr03	10549452	10549461	DEL	chr03	10549443	10549475	agg	27
chr03	10549452	10549461	DEL	chr03	10549450	10549485	agg	27
chr03	10549452	10549461	DEL	chr03	10549456	10549494	aggaga	27
chr03	10775711	10775729	DEL	chr03	10775693	10775752	acc	54
chr03	10910551	10910554	DEL	chr03	10910548	10910562	cct	9
chr03	10913814	10913823	DEL	chr03	10913810	10913842	tcc	27
chr03	10913814	10913823	DEL	chr03	10913815	10913856	cct	27
chr03	10932880	10932883	DEL	chr03	10932877	10932891	gag	9
chr03	11210779	11210788	DEL	chr03	11210785	11210817	ctc	27
chr03	11396032	11396038	DEL	chr03	11396033	11396059	cct	18
chr03	11402680	11402692	DEL	chr03	11402677	11402718	ctc	36
chr03	11402680	11402692	DEL	chr03	11402681	11402734	tcgcct	36
chr03	11467662	11467686	DEL	chr03	11467663	11467764	gcactg	72
chr03	11467685	11467697	DEL	chr03	11467673	11467732	tggcac	36
chr03	11635466	11635472	DEL	chr03	11635467	11635493	gga	18
chr03	12280060	12280072	DEL	chr03	12280048	12280089	gga	36
chr03	12280060	12280072	DEL	chr03	12280061	12280117	gcg	36
chr03	12458482	12458497	DEL	chr03	12458467	12458517	gct	45
chr03	12458482	12458497	DEL	chr03	12458478	12458528	cgc	45
chr03	12458540	12458549	DEL	chr03	12458541	12458582	ggc	27
chr03	12478062	12478071	DEL	chr03	12478053	12478085	tcc	27
chr03	12478062	12478071	DEL	chr03	12478063	12478104	gcg	27
chr03	12478074	12478080	DEL	chr03	12478068	12478097	ggc	18
chr03	12478074	12478080	DEL	chr03	12478078	12478101	gcc	18
chr03	12540132	12540138	DEL	chr03	12540133	12540159	gga	18
chr03	12646772	12646778	DEL	chr03	12646766	12646792	tgc	18
chr03	12646772	12646778	DEL	chr03	12646773	12646799	gcc	18
chr03	12764519	12764540	DEL	chr03	12764504	12764572	ctc	63
chr03	12764519	12764540	DEL	chr03	12764526	12764594	tcc	63
chr03	12764519	12764540	DEL	chr03	12764533	12764601	ctc	63
chr03	12768782	12768785	DEL	chr03	12768779	12768793	gtc	9
chr03	12976201	12976207	DEL	chr03	12976198	12976221	cgc	18
chr03	12976201	12976207	DEL	chr03	12976203	12976229	cgc	18
chr03	12976202	12976208	DEL	chr03	12976198	12976221	cgc	18
chr03	12976202	12976208	DEL	chr03	12976203	12976229	cgc	18
chr03	13124374	13124383	DEL	chr03	13124368	13124400	aga	27
chr03	13124374	13124383	DEL	chr03	13124369	13124407	gaagag	27
chr03	13124374	13124383	DEL	chr03	13124384	13124416	ggc	27
chr03	13631423	13631435	DEL	chr03	13631424	13631480	cgg	36
chr03	13666992	13667004	DEL	chr03	13666980	13667021	cgg	36
chr03	13719911	13719920	DEL	chr03	13719902	13719937	agg	27
chr03	13719911	13719920	DEL	chr03	13719912	13719953	gga	27
chr03	13738764	13738773	DEL	chr03	13738765	13738806	ggc	27
chr03	14010275	14010284	DEL	chr03	14010276	14010317	gtc	27
chr03	14147691	14147694	DEL	chr03	14147688	14147702	gcg	9
chr03	14176222	14176228	DEL	chr03	14176223	14176249	ggc	18
chr03	14294602	14294608	DEL	chr03	14294603	14294629	tct	18
chr03	14316093	14316099	DEL	chr03	14316091	14316114	aga	18
chr03	14424630	14424645	DEL	chr03	14424620	14424682	ccg	45
chr03	14424630	14424645	DEL	chr03	14424646	14424699	gcc	45
chr03	14424633	14424645	DEL	chr03	14424621	14424671	cgc	36
chr03	14424633	14424645	DEL	chr03	14424646	14424690	gcc	36
chr03	14424636	14424645	DEL	chr03	14424627	14424662	cgc	27
chr03	14424636	14424645	DEL	chr03	14424646	14424678	gcc	27
chr03	14533883	14533895	DEL	chr03	14533884	14533934	gcg	36
chr03	14543781	14543805	DEL	chr03	14543778	14543855	atc	72
chr03	14545778	14545784	DEL	chr03	14545772	14545801	cgc	18
chr03	14545781	14545784	DEL	chr03	14545778	14545792	cgc	9
chr03	14549496	14549517	DEL	chr03	14549505	14549573	cgg	63
chr03	14670883	14670892	DEL	chr03	14670884	14670925	gcc	27
chr03	15005962	15005968	DEL	chr03	15005961	15005984	gcg	18
chr03	15323889	15323898	DEL	chr03	15323880	15323918	cgg	27
chr03	15323889	15323898	DEL	chr03	15323890	15323931	gga	27
chr03	15478196	15478211	DEL	chr03	15478188	15478247	ggc	45
chr03	15482084	15482093	DEL	chr03	15482085	15482126	ccg	27
chr03	15528245	15528254	DEL	chr03	15528246	15528287	cgc	27
chr03	15572087	15572093	DEL	chr03	15572081	15572104	ccg	18
chr03	15572087	15572093	DEL	chr03	15572089	15572112	gac	18
chr03	15645621	15645627	DEL	chr03	15645622	15645648	ttc	18
chr03	16051345	16051351	DEL	chr03	16051346	16051372	gcc	18
chr03	16214415	16214427	DEL	chr03	16214422	16214463	gcc	36
chr03	16214418	16214430	DEL	chr03	16214422	16214463	gcc	36
chr03	16297024	16297042	DEL	chr03	16297015	16297074	acg	54
chr03	16297061	16297070	DEL	chr03	16297062	16297103	cgg	27
chr03	16704543	16704552	DEL	chr03	16704544	16704576	gga	27
chr03	16704543	16704552	DEL	chr03	16704553	16704585	gga	27
chr03	16754139	16754148	DEL	chr03	16754140	16754181	tct	27
chr03	16754157	16754163	DEL	chr03	16754151	16754180	ttc	18
chr03	16754157	16754163	DEL	chr03	16754161	16754184	tcc	18
chr03	17236649	17236652	DEL	chr03	17236646	17236660	ccg	9
chr03	17285922	17285931	DEL	chr03	17285916	17285951	tgc	27
chr03	17285922	17285931	DEL	chr03	17285923	17285964	gcc	27
chr03	17611379	17611385	DEL	chr03	17611379	17611402	ctc	18
chr03	17611382	17611385	DEL	chr03	17611379	17611393	ctc	9
chr03	17688105	17688117	DEL	chr03	17688097	17688144	gcagcg	36
chr03	17688105	17688117	DEL	chr03	17688106	17688159	gcg	36
chr03	17789062	17789068	DEL	chr03	17789063	17789089	gga	18
chr03	17985632	17985635	DEL	chr03	17985629	17985643	act	9
chr03	18635894	18635900	DEL	chr03	18635888	18635911	cca	18
chr03	18635894	18635900	DEL	chr03	18635895	18635921	cca	18
chr03	20187840	20187846	DEL	chr03	20187834	20187863	cggagg	18
chr03	20403102	20403114	DEL	chr03	20403092	20403148	cgc	36
chr03	20403102	20403114	DEL	chr03	20403109	20403156	ccgcca	36
chr03	20403105	20403120	DEL	chr03	20403092	20403157	cgc	45
chr03	20403105	20403120	DEL	chr03	20403109	20403177	ccgcca	45
chr03	20403108	20403120	DEL	chr03	20403096	20403149	gcc	36
chr03	20403108	20403120	DEL	chr03	20403109	20403162	ccgcca	36
chr03	22338249	22338258	DEL	chr03	22338250	22338291	ggc	27
chr03	23159004	23159010	DEL	chr03	23159005	23159031	gcg	18
chr03	23715235	23715244	DEL	chr03	23715230	23715262	gct	27
chr03	23715235	23715244	DEL	chr03	23715236	23715277	gca	27
chr03	23841794	23841803	DEL	chr03	23841795	23841836	gcc	27
chr03	23855193	23855199	DEL	chr03	23855194	23855220	ctc	18
chr03	23876262	23876265	DEL	chr03	23876259	23876273	aga	9
chr03	24415888	24415906	DEL	chr03	24415893	24415952	ccg	54
chr03	24415888	24415906	DEL	chr03	24415917	24415976	ccg	54
chr03	24657533	24657542	DEL	chr03	24657524	24657559	tgg	27
chr03	24657533	24657542	DEL	chr03	24657534	24657575	gag	27
chr03	25003368	25003377	DEL	chr03	25003360	25003398	ccggcc	27
chr03	25003368	25003377	DEL	chr03	25003369	25003401	gcc	27
chr03	25003368	25003377	DEL	chr03	25003378	25003410	gcc	27
chr03	25003380	25003389	DEL	chr03	25003371	25003403	cgc	27
chr03	25003380	25003389	DEL	chr03	25003378	25003410	gcc	27
chr03	25061519	25061522	DEL	chr03	25061516	25061530	gcc	9
chr03	25272953	25272965	DEL	chr03	25272945	25272986	gtg	36
chr03	25272953	25272965	DEL	chr03	25272954	25272998	gcg	36
chr03	25272953	25272965	DEL	chr03	25272965	25273012	ggc	36
chr03	25942755	25942758	DEL	chr03	25942752	25942766	ctc	9
chr03	26291899	26291902	DEL	chr03	26291896	26291910	cga	9
chr03	26312811	26312823	DEL	chr03	26312812	26312868	gcg	36
chr03	26448918	26448921	DEL	chr03	26448915	26448929	tct	9
chr03	26707983	26707986	DEL	chr03	26707980	26707994	tct	9
chr03	27283170	27283182	DEL	chr03	27283164	27283205	cgg	36
chr03	27283170	27283182	DEL	chr03	27283171	27283227	gcg	36
chr03	27297421	27297433	DEL	chr03	27297422	27297463	cgg	36
chr03	27297421	27297433	DEL	chr03	27297431	27297475	cgg	36
chr03	27334243	27334249	DEL	chr03	27334243	27334266	tcc	18
chr03	27408331	27408343	DEL	chr03	27408337	27408381	cct	36
chr03	27408331	27408343	DEL	chr03	27408343	27408390	cctccc	36
chr03	27812173	27812179	DEL	chr03	27812174	27812200	cct	18
chr03	27823095	27823110	DEL	chr03	27823096	27823164	cgc	45
chr03	27823115	27823121	DEL	chr03	27823109	27823138	gcc	18
chr03	28143103	28143106	DEL	chr03	28143100	28143114	cct	9
chr03	28152031	28152037	DEL	chr03	28152032	28152058	gcc	18
chr03	28236210	28236216	DEL	chr03	28236208	28236231	ccg	18
chr03	28275598	28275610	DEL	chr03	28275593	28275634	tgg	36
chr03	28275598	28275610	DEL	chr03	28275599	28275655	cgc	36
chr03	28390114	28390120	DEL	chr03	28390115	28390141	agc	18
chr03	28541195	28541201	DEL	chr03	28541196	28541222	ggc	18
chr03	28636223	28636235	DEL	chr03	28636211	28636252	cgc	36
chr03	28636223	28636235	DEL	chr03	28636224	28636280	cgc	36
chr03	28781466	28781478	DEL	chr03	28781455	28781496	tgc	36
chr03	28781466	28781478	DEL	chr03	28781476	28781517	ctc	36
chr03	28860060	28860075	DEL	chr03	28860049	28860099	ggc	45
chr03	28860060	28860075	DEL	chr03	28860062	28860115	gcg	45
chr03	28860060	28860075	DEL	chr03	28860077	28860133	gcg	45
chr03	29312827	29312842	DEL	chr03	29312816	29312866	gca	45
chr03	29312827	29312842	DEL	chr03	29312826	29312876	cgg	45
chr03	29312827	29312842	DEL	chr03	29312833	29312883	gcg	45
chr03	29312827	29312842	DEL	chr03	29312838	29312888	gcg	45
chr03	29312827	29312842	DEL	chr03	29312843	29312893	gcg	45
chr03	29312827	29312842	DEL	chr03	29312848	29312898	gcg	45
chr03	29462988	29462994	DEL	chr03	29462982	29463011	cgg	18
chr03	29556664	29556673	DEL	chr03	29556660	29556692	ctc	27
chr03	30078414	30078417	DEL	chr03	30078411	30078425	atc	9
chr03	30173852	30173864	DEL	chr03	30173853	30173906	gcg	36
chr03	30406864	30406870	DEL	chr03	30406865	30406891	aag	18
chr03	30502514	30502523	DEL	chr03	30502515	30502556	cgc	27
chr03	30733408	30733414	DEL	chr03	30733409	30733435	gga	18
chr03	30814625	30814631	DEL	chr03	30814623	30814646	ctc	18
chr03	30907051	30907057	DEL	chr03	30907054	30907077	cgc	18
chr03	31190775	31190781	DEL	chr03	31190776	31190802	ggc	18
chr03	31212368	31212371	DEL	chr03	31212365	31212379	gag	9
chr03	31382359	31382371	DEL	chr03	31382355	31382399	ggc	36
chr03	31652737	31652743	DEL	chr03	31652738	31652764	agg	18
chr03	31749509	31749518	DEL	chr03	31749500	31749538	tcttcc	27
chr03	31749509	31749518	DEL	chr03	31749510	31749548	cca	27
chr03	31945025	31945034	DEL	chr03	31945026	31945067	ctc	27
chr03	31964586	31964595	DEL	chr03	31964587	31964628	tgc	27
chr03	32095550	32095556	DEL	chr03	32095544	32095570	cga	18
chr03	32153962	32153971	DEL	chr03	32153968	32154006	ggc	27
chr03	32153967	32153973	DEL	chr03	32153968	32153994	ggc	18
chr03	32185235	32185244	DEL	chr03	32185227	32185259	gcc	27
chr03	32265738	32265747	DEL	chr03	32265739	32265780	gct	27
chr03	32383717	32383726	DEL	chr03	32383718	32383759	cgg	27
chr03	32554265	32554277	DEL	chr03	32554262	32554309	ggctgc	36
chr03	32554265	32554277	DEL	chr03	32554272	32554316	gcg	36
chr03	32909863	32909875	DEL	chr03	32909858	32909902	cca	36
chr03	32909863	32909875	DEL	chr03	32909864	32909917	ccacct	36
chr03	33047315	33047327	DEL	chr03	33047316	33047372	ggc	36
chr03	33047356	33047365	DEL	chr03	33047359	33047400	ggc	27
chr03	33047358	33047373	DEL	chr03	33047359	33047430	ggc	45
chr03	33096260	33096269	DEL	chr03	33096254	33096286	cca	27
chr03	33096260	33096269	DEL	chr03	33096261	33096302	cgc	27
chr03	33101412	33101424	DEL	chr03	33101400	33101450	acg	36
chr03	33101412	33101424	DEL	chr03	33101413	33101466	cgg	36
chr03	33198022	33198034	DEL	chr03	33198012	33198056	cgc	36
chr03	33198022	33198034	DEL	chr03	33198019	33198063	gcg	36
chr03	33198022	33198034	DEL	chr03	33198034	33198081	acggcg	36
chr03	33267212	33267224	DEL	chr03	33267213	33267266	cgtctg	36
chr03	33364052	33364067	DEL	chr03	33364039	33364089	agc	45
chr03	33364052	33364067	DEL	chr03	33364043	33364096	gcc	45
chr03	33364052	33364067	DEL	chr03	33364051	33364110	cgg	45
chr03	33364061	33364067	DEL	chr03	33364055	33364084	ggc	18
chr03	33364064	33364067	DEL	chr03	33364061	33364075	ggc	9
chr03	33402197	33402203	DEL	chr03	33402198	33402221	cca	18
chr03	33436623	33436629	DEL	chr03	33436624	33436650	ggc	18
chr03	33437764	33437770	DEL	chr03	33437759	33437782	agc	18
chr03	33437764	33437770	DEL	chr03	33437765	33437791	gcg	18
chr03	33480108	33480114	DEL	chr03	33480109	33480135	cgc	18
chr03	33518816	33518828	DEL	chr03	33518817	33518873	tgc	36
chr03	33528598	33528610	DEL	chr03	33528602	33528643	gag	36
chr03	33528598	33528610	DEL	chr03	33528614	33528655	gag	36
chr03	33551018	33551024	DEL	chr03	33551013	33551039	ggc	18
chr03	33592811	33592820	DEL	chr03	33592812	33592853	cgc	27
chr03	33592822	33592834	DEL	chr03	33592812	33592868	cgc	36
chr03	33592822	33592834	DEL	chr03	33592832	33592873	cct	36
chr03	33592822	33592834	DEL	chr03	33592839	33592880	ctc	36
chr03	33592825	33592834	DEL	chr03	33592816	33592860	gcc	27
chr03	33592825	33592834	DEL	chr03	33592832	33592864	cct	27
chr03	33592828	33592840	DEL	chr03	33592816	33592869	gcc	36
chr03	33592828	33592840	DEL	chr03	33592832	33592873	cct	36
chr03	33592828	33592840	DEL	chr03	33592839	33592886	ctc	36
chr03	33592831	33592843	DEL	chr03	33592819	33592869	gcc	36
chr03	33592831	33592843	DEL	chr03	33592832	33592873	cct	36
chr03	33592831	33592843	DEL	chr03	33592839	33592886	ctc	36
chr03	33592832	33592838	DEL	chr03	33592826	33592849	ccg	18
chr03	33592832	33592838	DEL	chr03	33592832	33592855	cct	18
chr03	33592835	33592838	DEL	chr03	33592832	33592846	cct	9
chr03	33905927	33905939	DEL	chr03	33905931	33905972	cac	36
chr03	33905927	33905939	DEL	chr03	33905937	33905978	cat	36
chr03	33939016	33939022	DEL	chr03	33939014	33939037	agc	18
chr03	33962411	33962420	DEL	chr03	33962402	33962434	tcc	27
chr03	33962411	33962420	DEL	chr03	33962412	33962453	ggc	27
chr03	33998617	33998626	DEL	chr03	33998608	33998640	gcg	27
chr03	33998617	33998626	DEL	chr03	33998616	33998651	ggc	27
chr03	33998617	33998626	DEL	chr03	33998627	33998659	cgg	27
chr03	34036299	34036305	DEL	chr03	34036305	34036328	tac	18
chr03	34036301	34036307	DEL	chr03	34036305	34036328	tac	18
chr03	34166176	34166182	DEL	chr03	34166170	34166193	aag	18
chr03	34407199	34407211	DEL	chr03	34407191	34407232	gga	36
chr03	34407199	34407211	DEL	chr03	34407200	34407256	cgc	36
chr03	34412888	34412894	DEL	chr03	34412889	34412915	gga	18
chr03	34501202	34501211	DEL	chr03	34501209	34501241	cca	27
chr03	34567995	34567998	DEL	chr03	34567992	34568006	ttg	9
chr03	34712908	34712917	DEL	chr03	34712909	34712941	cgg	27
chr03	34712908	34712917	DEL	chr03	34712916	34712951	ggc	27
chr03	34762958	34762964	DEL	chr03	34762959	34762985	agg	18
chr03	34820336	34820345	DEL	chr03	34820337	34820369	gag	27
chr03	34820336	34820345	DEL	chr03	34820339	34820377	ggaggt	27
chr03	34820336	34820345	DEL	chr03	34820348	34820380	ggt	27
chr03	34820341	34820350	DEL	chr03	34820337	34820369	gag	27
chr03	34820341	34820350	DEL	chr03	34820339	34820377	ggaggt	27
chr03	34820341	34820350	DEL	chr03	34820348	34820383	ggt	27
chr03	34852468	34852471	DEL	chr03	34852465	34852479	aac	9
chr03	34878941	34878944	DEL	chr03	34878938	34878952	cct	9
chr03	34900852	34900861	DEL	chr03	34900853	34900894	gcg	27
chr03	35190882	35190894	DEL	chr03	35190873	35190914	aat	36
chr03	35190882	35190894	DEL	chr03	35190879	35190929	ggc	36
chr03	35190882	35190894	DEL	chr03	35190895	35190939	gcg	36
chr03	35264435	35264447	DEL	chr03	35264436	35264492	ggc	36
chr03	35264452	35264461	DEL	chr03	35264443	35264487	gcg	27
chr03	35264452	35264461	DEL	chr03	35264459	35264491	cgt	27
chr03	35385144	35385150	DEL	chr03	35385140	35385163	gag	18
chr03	35385144	35385150	DEL	chr03	35385145	35385171	ggc	18
chr03	35444496	35444499	DEL	chr03	35444493	35444507	tcc	9
chr03	35494139	35494145	DEL	chr03	35494140	35494166	ccg	18
chr03	35589854	35589866	DEL	chr03	35589847	35589888	gaa	36
chr03	35589854	35589866	DEL	chr03	35589855	35589911	gcg	36
chr03	35607859	35607865	DEL	chr03	35607853	35607876	agg	18
chr03	35669756	35669768	DEL	chr03	35669750	35669791	cgg	36
chr03	35669756	35669768	DEL	chr03	35669757	35669810	cgc	36
chr03	35822165	35822168	DEL	chr03	35822162	35822176	gcc	9
chr03	35899336	35899342	DEL	chr03	35899337	35899363	cgc	18
chr03	35960503	35960515	DEL	chr03	35960515	35960556	cgg	36
chr03	36186375	36186396	DEL	chr03	36186355	36186423	tgc	63
chr03	36186375	36186396	DEL	chr03	36186405	36186473	aat	63
chr03	36228784	36228790	DEL	chr03	36228785	36228811	ggc	18
chr03	36271440	36271452	DEL	chr03	36271428	36271478	agg	36
chr03	36271440	36271452	DEL	chr03	36271441	36271494	ggagtt	36
chr03	36295309	36295321	DEL	chr03	36295310	36295363	ccgatt	36
chr04	186307	186316	DEL	chr04	186298	186330	agg	27
chr04	186307	186316	DEL	chr04	186299	186337	ggaggc	27
chr04	186307	186316	DEL	chr04	186308	186349	ggc	27
chr04	222790	222799	DEL	chr04	222787	222819	gga	27
chr04	222790	222799	DEL	chr04	222799	222831	aga	27
chr04	321345	321351	DEL	chr04	321346	321372	ccg	18
chr04	321363	321369	DEL	chr04	321357	321386	gcc	18
chr04	333762	333765	DEL	chr04	333759	333773	cct	9
chr04	367405	367408	DEL	chr04	367402	367416	gct	9
chr04	610128	610140	DEL	chr04	610118	610159	ctc	36
chr04	610128	610140	DEL	chr04	610125	610169	cgc	36
chr04	610128	610140	DEL	chr04	610129	610182	gccgca	36
chr04	1046964	1046967	DEL	chr04	1046961	1046975	gcc	9
chr04	1054697	1054706	DEL	chr04	1054694	1054726	tgc	27
chr04	1054697	1054706	DEL	chr04	1054698	1054739	gcc	27
chr04	1702121	1702124	DEL	chr04	1702118	1702132	cct	9
chr04	1754485	1754497	DEL	chr04	1754473	1754514	ctc	36
chr04	1754485	1754497	DEL	chr04	1754486	1754530	cgc	36
chr04	1754485	1754497	DEL	chr04	1754497	1754541	ccg	36
chr04	2034534	2034537	DEL	chr04	2034531	2034545	cac	9
chr04	2441521	2441530	DEL	chr04	2441527	2441559	cct	27
chr04	2441608	2441617	DEL	chr04	2441603	2441635	cca	27
chr04	2441608	2441617	DEL	chr04	2441615	2441647	cct	27
chr04	2511517	2511526	DEL	chr04	2511520	2511552	ctc	27
chr04	2511517	2511526	DEL	chr04	2511525	2511560	ctc	27
chr04	2826210	2826234	DEL	chr04	2826188	2826265	caa	72
chr04	2826210	2826234	DEL	chr04	2826211	2826291	cct	72
chr04	2826210	2826234	DEL	chr04	2826223	2826300	ctt	72
chr04	2826210	2826234	DEL	chr04	2826228	2826323	tcc	72
chr04	2826227	2826239	DEL	chr04	2826223	2826264	ctt	36
chr04	2826227	2826239	DEL	chr04	2826228	2826284	tcc	36
chr04	4463051	4463054	DEL	chr04	4463048	4463062	tcc	9
chr04	4463090	4463099	DEL	chr04	4463084	4463116	ctc	27
chr04	4463090	4463099	DEL	chr04	4463091	4463132	tcc	27
chr04	4490069	4490096	DEL	chr04	4490043	4490129	gtt	81
chr04	4490069	4490096	DEL	chr04	4490089	4490175	tga	81
chr04	4521450	4521480	DEL	chr04	4521423	4521518	cca	90
chr04	5216486	5216492	DEL	chr04	5216487	5216513	agc	18
chr04	5788465	5788477	DEL	chr04	5788462	5788503	tgg	36
chr04	5788465	5788477	DEL	chr04	5788463	5788510	ggtgga	36
chr04	5788465	5788477	DEL	chr04	5788472	5788513	gga	36
chr04	5788465	5788477	DEL	chr04	5788478	5788519	ggc	36
chr04	6456017	6456023	DEL	chr04	6456021	6456044	gcg	18
chr04	6481843	6481855	DEL	chr04	6481836	6481883	ttgaag	36
chr04	7504049	7504058	DEL	chr04	7504050	7504091	cct	27
chr04	8072192	8072207	DEL	chr04	8072193	8072255	gcccccgcc	45
chr04	8072192	8072207	DEL	chr04	8072197	8072247	ccg	45
chr04	8072192	8072207	DEL	chr04	8072206	8072262	ccg	45
chr04	8072196	8072211	DEL	chr04	8072193	8072255	gcccccgcc	45
chr04	8072196	8072211	DEL	chr04	8072197	8072247	ccg	45
chr04	8072196	8072211	DEL	chr04	8072206	8072262	ccg	45
chr04	8321327	8321351	DEL	chr04	8321311	8321388	tcg	72
chr04	8321327	8321351	DEL	chr04	8321321	8321398	aca	72
chr04	8321327	8321351	DEL	chr04	8321344	8321421	tcg	72
chr04	8321327	8321351	DEL	chr04	8321349	8321426	gta	72
chr04	11764808	11764823	DEL	chr04	11764800	11764850	ctt	45
chr04	11764808	11764823	DEL	chr04	11764809	11764880	cgc	45
chr04	12027007	12027013	DEL	chr04	12027008	12027034	ctc	18
chr04	12539533	12539539	DEL	chr04	12539527	12539550	agt	18
chr04	12539533	12539539	DEL	chr04	12539534	12539560	gct	18
chr04	13625004	13625013	DEL	chr04	13625005	13625046	cgg	27
chr04	13830131	13830152	DEL	chr04	13830142	13830219	ggc	63
chr04	13830131	13830152	DEL	chr04	13830161	13830229	ggc	63
chr04	14722004	14722016	DEL	chr04	14721992	14722033	gcc	36
chr04	14722004	14722016	DEL	chr04	14721999	14722040	act	36
chr04	14722004	14722016	DEL	chr04	14722005	14722061	ccg	36
chr04	14819225	14819243	DEL	chr04	14819242	14819301	tgt	54
chr04	16001584	16001587	DEL	chr04	16001581	16001595	ggc	9
chr04	16402217	16402223	DEL	chr04	16402218	16402244	gcg	18
chr04	16553259	16553268	DEL	chr04	16553263	16553301	ccgccg	27
chr04	16553259	16553268	DEL	chr04	16553264	16553302	cgc	27
chr04	17097773	17097782	DEL	chr04	17097774	17097815	cct	27
chr04	18057594	18057597	DEL	chr04	18057591	18057605	tac	9
chr04	18405625	18405637	DEL	chr04	18405614	18405655	ggt	36
chr04	18405625	18405637	DEL	chr04	18405623	18405670	cgacgg	36
chr04	18405625	18405637	DEL	chr04	18405632	18405682	cgg	36
chr04	18468300	18468306	DEL	chr04	18468301	18468327	cca	18
chr04	18553758	18553773	DEL	chr04	18553749	18553799	agc	45
chr04	18553758	18553773	DEL	chr04	18553753	18553803	gcg	45
chr04	18553758	18553773	DEL	chr04	18553763	18553816	ggc	45
chr04	18695942	18695948	DEL	chr04	18695939	18695962	ctc	18
chr04	18720567	18720573	DEL	chr04	18720566	18720589	cgc	18
chr04	18740598	18740607	DEL	chr04	18740590	18740625	ctt	27
chr04	18740598	18740607	DEL	chr04	18740607	18740639	ctc	27
chr04	18860763	18860772	DEL	chr04	18860756	18860791	gcg	27
chr04	18860763	18860772	DEL	chr04	18860763	18860795	cgt	27
chr04	18860763	18860772	DEL	chr04	18860773	18860805	ggc	27
chr04	19139480	19139504	DEL	chr04	19139480	19139566	ccg	72
chr04	19139480	19139504	DEL	chr04	19139505	19139585	cgc	72
chr04	19458162	19458168	DEL	chr04	19458156	19458185	cgg	18
chr04	19607803	19607812	DEL	chr04	19607798	19607830	ggc	27
chr04	19607803	19607812	DEL	chr04	19607804	19607845	gga	27
chr04	19610525	19610531	DEL	chr04	19610519	19610542	tgg	18
chr04	19610525	19610531	DEL	chr04	19610526	19610552	gga	18
chr04	19651699	19651714	DEL	chr04	19651697	19651747	ata	45
chr04	19858929	19858941	DEL	chr04	19858924	19858965	gag	36
chr04	19858929	19858941	DEL	chr04	19858930	19858983	ggaggc	36
chr04	19886737	19886746	DEL	chr04	19886738	19886770	tgc	27
chr04	19886737	19886746	DEL	chr04	19886746	19886781	ctg	27
chr04	19886759	19886771	DEL	chr04	19886747	19886794	tgc	36
chr04	19886759	19886771	DEL	chr04	19886757	19886798	gcc	36
chr04	19886762	19886771	DEL	chr04	19886753	19886785	tgc	27
chr04	19886762	19886771	DEL	chr04	19886757	19886789	gcc	27
chr04	19933171	19933174	DEL	chr04	19933168	19933182	cct	9
chr04	20457983	20457986	DEL	chr04	20457980	20457994	gct	9
chr04	20690897	20690909	DEL	chr04	20690903	20690956	atcgcc	36
chr04	20690939	20690942	DEL	chr04	20690936	20690950	tcg	9
chr04	20690957	20690969	DEL	chr04	20690945	20690995	acg	36
chr04	20690957	20690969	DEL	chr04	20690958	20691014	cgg	36
chr04	21323086	21323095	DEL	chr04	21323087	21323128	cac	27
chr04	21405291	21405300	DEL	chr04	21405292	21405333	cgg	27
chr04	21414521	21414530	DEL	chr04	21414522	21414563	ctg	27
chr04	21595260	21595272	DEL	chr04	21595248	21595292	gct	36
chr04	21595260	21595272	DEL	chr04	21595257	21595307	gcg	36
chr04	21595260	21595272	DEL	chr04	21595273	21595317	cgg	36
chr04	21601819	21601831	DEL	chr04	21601824	21601877	ggc	36
chr04	21601823	21601835	DEL	chr04	21601824	21601877	ggc	36
chr04	21728156	21728168	DEL	chr04	21728157	21728213	ggc	36
chr04	21881696	21881702	DEL	chr04	21881691	21881714	gga	18
chr04	21881696	21881702	DEL	chr04	21881697	21881723	gag	18
chr04	22079442	22079448	DEL	chr04	22079443	22079469	gcc	18
chr04	22097379	22097391	DEL	chr04	22097368	22097409	gcg	36
chr04	22097379	22097391	DEL	chr04	22097373	22097414	gcg	36
chr04	22097379	22097391	DEL	chr04	22097396	22097437	ctc	36
chr04	22168393	22168405	DEL	chr04	22168387	22168431	ccg	36
chr04	22168393	22168405	DEL	chr04	22168394	22168447	cgcctt	36
chr04	22189101	22189107	DEL	chr04	22189095	22189124	ccg	18
chr04	22189101	22189107	DEL	chr04	22189105	22189128	cga	18
chr04	22189104	22189107	DEL	chr04	22189101	22189115	ccg	9
chr04	22197395	22197404	DEL	chr04	22197390	22197422	atg	27
chr04	22242167	22242173	DEL	chr04	22242161	22242187	agg	18
chr04	22242167	22242173	DEL	chr04	22242168	22242194	ggc	18
chr04	22243933	22243948	DEL	chr04	22243934	22244005	gcg	45
chr04	22243956	22243974	DEL	chr04	22243938	22244012	cgg	54
chr04	22249605	22249614	DEL	chr04	22249610	22249642	gcc	27
chr04	22414545	22414557	DEL	chr04	22414538	22414582	ctc	36
chr04	22414545	22414557	DEL	chr04	22414546	22414602	cgg	36
chr04	22472219	22472243	DEL	chr04	22472256	22472333	gct	72
chr04	22633248	22633257	DEL	chr04	22633243	22633275	tgt	27
chr04	22633248	22633257	DEL	chr04	22633249	22633290	tgc	27
chr04	23117944	23117947	DEL	chr04	23117941	23117955	tga	9
chr04	23125980	23125998	DEL	chr04	23125973	23126032	gcc	54
chr04	23125980	23125998	DEL	chr04	23125989	23126048	gcc	54
chr04	23125991	23126006	DEL	chr04	23125989	23126039	gcc	45
chr04	23228157	23228166	DEL	chr04	23228148	23228192	cgc	27
chr04	23228157	23228166	DEL	chr04	23228164	23228199	gcg	27
chr04	23237088	23237094	DEL	chr04	23237089	23237115	ggc	18
chr04	23315217	23315226	DEL	chr04	23315217	23315252	gga	27
chr04	23315217	23315226	DEL	chr04	23315227	23315259	gag	27
chr04	23315220	23315226	DEL	chr04	23315217	23315243	gga	18
chr04	23326756	23326762	DEL	chr04	23326757	23326783	cgg	18
chr04	23721618	23721633	DEL	chr04	23721609	23721659	ggc	45
chr04	23721618	23721633	DEL	chr04	23721619	23721690	agg	45
chr04	23742480	23742501	DEL	chr04	23742500	23742568	tgt	63
chr04	24178878	24178905	DEL	chr04	24178879	24178965	gcg	81
chr04	24178878	24178905	DEL	chr04	24178891	24178977	gcg	81
chr04	24178878	24178905	DEL	chr04	24178899	24179000	ggc	81
chr04	24178878	24178905	DEL	chr04	24178920	24179006	gag	81
chr04	24178898	24178910	DEL	chr04	24178891	24178932	gcg	36
chr04	24178898	24178910	DEL	chr04	24178899	24178955	ggc	36
chr04	24241016	24241034	DEL	chr04	24241008	24241067	tct	54
chr04	24241016	24241034	DEL	chr04	24241015	24241086	cgg	54
chr04	24241016	24241034	DEL	chr04	24241035	24241097	gcg	54
chr04	24241025	24241034	DEL	chr04	24241016	24241057	ggc	27
chr04	24241025	24241034	DEL	chr04	24241035	24241067	gcg	27
chr04	24722707	24722716	DEL	chr04	24722705	24722737	tac	27
chr04	24976046	24976064	DEL	chr04	24976042	24976107	cgc	54
chr04	24976046	24976064	DEL	chr04	24976054	24976113	cgt	54
chr04	24976046	24976064	DEL	chr04	24976060	24976119	gtc	54
chr04	24976046	24976064	DEL	chr04	24976065	24976127	ccg	54
chr04	24976046	24976064	DEL	chr04	24976073	24976132	gag	54
chr04	25258395	25258404	DEL	chr04	25258392	25258424	aga	27
chr04	25429184	25429190	DEL	chr04	25429179	25429202	ctc	18
chr04	25429184	25429190	DEL	chr04	25429183	25429206	tct	18
chr04	25909996	25909999	DEL	chr04	25909993	25910007	cga	9
chr04	26475275	26475278	DEL	chr04	26475272	26475286	gag	9
chr04	26517464	26517476	DEL	chr04	26517462	26517503	gcc	36
chr04	26517464	26517476	DEL	chr04	26517465	26517518	gccgca	36
chr04	26585740	26585764	DEL	chr04	26585770	26585847	ctc	72
chr04	26585740	26585764	DEL	chr04	26585780	26585857	ccg	72
chr04	27505515	27505524	DEL	chr04	27505514	27505546	ggt	27
chr04	27505526	27505541	DEL	chr04	27505514	27505564	ggt	45
chr04	27576962	27576992	DEL	chr04	27576967	27577062	gaa	90
chr04	27576962	27576992	DEL	chr04	27576996	27577091	ttc	90
chr04	27576962	27576992	DEL	chr04	27577002	27577097	act	90
chr04	28202389	28202395	DEL	chr04	28202388	28202411	gag	18
chr04	28494387	28494393	DEL	chr04	28494381	28494410	gccgtc	18
chr04	28574520	28574526	DEL	chr04	28574518	28574541	cgc	18
chr04	28666409	28666412	DEL	chr04	28666406	28666420	aag	9
chr04	28862643	28862646	DEL	chr04	28862640	28862654	ttc	9
chr04	29277147	29277159	DEL	chr04	29277148	29277204	gag	36
chr04	29368474	29368486	DEL	chr04	29368465	29368506	gat	36
chr04	29368474	29368486	DEL	chr04	29368475	29368528	gct	36
chr04	29787919	29787928	DEL	chr04	29787919	29787951	cgg	27
chr04	29803088	29803097	DEL	chr04	29803092	29803130	gcg	27
chr04	29803091	29803103	DEL	chr04	29803092	29803148	gcg	36
chr04	29832889	29832904	DEL	chr04	29832890	29832961	gaa	45
chr04	29988129	29988132	DEL	chr04	29988126	29988140	tgc	9
chr04	30030639	30030645	DEL	chr04	30030640	30030666	tgc	18
chr04	30113543	30113549	DEL	chr04	30113544	30113570	gga	18
chr04	30200655	30200664	DEL	chr04	30200647	30200679	ttg	27
chr04	30200655	30200664	DEL	chr04	30200656	30200697	cgg	27
chr04	30223948	30223963	DEL	chr04	30223935	30223988	gga	45
chr04	30558590	30558596	DEL	chr04	30558587	30558610	tct	18
chr04	30879453	30879456	DEL	chr04	30879450	30879464	gag	9
chr04	30957562	30957580	DEL	chr04	30957544	30957609	gag	54
chr04	31068778	31068781	DEL	chr04	31068775	31068789	cga	9
chr04	31076533	31076548	DEL	chr04	31076537	31076587	ccg	45
chr04	31076533	31076548	DEL	chr04	31076552	31076602	ccg	45
chr04	31106006	31106009	DEL	chr04	31106003	31106017	cct	9
chr04	31169081	31169093	DEL	chr04	31169071	31169118	gaggcg	36
chr04	31169081	31169093	DEL	chr04	31169081	31169128	cgc	36
chr04	31169081	31169093	DEL	chr04	31169091	31169138	gcg	36
chr04	31257833	31257842	DEL	chr04	31257834	31257875	cgg	27
chr04	31416068	31416071	DEL	chr04	31416065	31416079	acc	9
chr04	31416413	31416419	DEL	chr04	31416414	31416440	gcg	18
chr04	31524667	31524670	DEL	chr04	31524664	31524678	cct	9
chr04	31749204	31749213	DEL	chr04	31749205	31749246	cgc	27
chr04	31841973	31841994	DEL	chr04	31841959	31842027	cgg	63
chr04	31841973	31841994	DEL	chr04	31841991	31842059	ggc	63
chr04	31841973	31841994	DEL	chr04	31841999	31842067	gga	63
chr04	31999442	31999454	DEL	chr04	31999442	31999483	tct	36
chr04	31999442	31999454	DEL	chr04	31999446	31999499	ctc	36
chr04	32059605	32059623	DEL	chr04	32059596	32059655	gcg	54
chr04	32059605	32059623	DEL	chr04	32059606	32059665	cgg	54
chr04	32145760	32145763	DEL	chr04	32145757	32145771	tgg	9
chr04	32342329	32342335	DEL	chr04	32342330	32342356	cgc	18
chr04	32531503	32531524	DEL	chr04	32531490	32531558	cgg	63
chr04	32531503	32531524	DEL	chr04	32531525	32531596	gcg	63
chr04	32678203	32678209	DEL	chr04	32678204	32678230	gag	18
chr04	32788822	32788834	DEL	chr04	32788823	32788879	cgg	36
chr04	33126949	33126955	DEL	chr04	33126948	33126971	aag	18
chr04	33126949	33126955	DEL	chr04	33126953	33126976	gag	18
chr04	33126952	33126955	DEL	chr04	33126949	33126963	aga	9
chr04	33261133	33261139	DEL	chr04	33261134	33261160	ggc	18
chr04	33314695	33314698	DEL	chr04	33314692	33314706	aga	9
chr04	33342006	33342009	DEL	chr04	33342003	33342017	gct	9
chr04	33703499	33703511	DEL	chr04	33703487	33703534	aggcgg	36
chr04	33703499	33703511	DEL	chr04	33703497	33703538	gga	36
chr04	33703499	33703511	DEL	chr04	33703500	33703553	ggaggt	36
chr04	33777241	33777247	DEL	chr04	33777235	33777264	cgg	18
chr04	33894332	33894341	DEL	chr04	33894333	33894374	ctg	27
chr04	34376008	34376011	DEL	chr04	34376005	34376019	tct	9
chr04	34393153	34393159	DEL	chr04	34393155	34393178	cac	18
chr04	34463704	34463710	DEL	chr04	34463705	34463731	gag	18
chr04	34738055	34738061	DEL	chr04	34738056	34738082	gag	18
chr04	34738073	34738076	DEL	chr04	34738070	34738084	gga	9
chr04	34819965	34819974	DEL	chr04	34819971	34820006	cgg	27
chr04	34839615	34839618	DEL	chr04	34839612	34839626	cgg	9
chr04	34893026	34893038	DEL	chr04	34893015	34893056	ccg	36
chr04	34893026	34893038	DEL	chr04	34893021	34893062	cct	36
chr04	34893026	34893038	DEL	chr04	34893027	34893068	cgc	36
chr04	34893026	34893038	DEL	chr04	34893036	34893080	cgc	36
chr04	34893029	34893035	DEL	chr04	34893027	34893050	cgc	18
chr04	35181984	35181990	DEL	chr04	35181982	35182005	gag	18
chr04	35344424	35344430	DEL	chr04	35344418	35344441	tcc	18
chr04	35360088	35360100	DEL	chr04	35360089	35360142	ggagca	36
chr04	35398622	35398634	DEL	chr04	35398639	35398680	tcc	36
chr04	35434950	35434959	DEL	chr04	35434941	35434979	taa	27
chr04	35434950	35434959	DEL	chr04	35434954	35434986	taa	27
chr05	47056	47062	DEL	chr05	47057	47083	aga	18
chr05	73266	73278	DEL	chr05	73254	73301	tcttcc	36
chr05	83440	83455	DEL	chr05	83433	83483	cgg	45
chr05	83442	83457	DEL	chr05	83433	83483	cgg	45
chr05	99738	99744	DEL	chr05	99735	99758	gga	18
chr05	99738	99744	DEL	chr05	99739	99765	gaa	18
chr05	151968	151974	DEL	chr05	151962	151985	ttc	18
chr05	277961	277970	DEL	chr05	277962	277994	cgc	27
chr05	277961	277970	DEL	chr05	277970	278002	ccg	27
chr05	278021	278030	DEL	chr05	278014	278046	ctt	27
chr05	284991	284997	DEL	chr05	284992	285018	gtt	18
chr05	311115	311127	DEL	chr05	311118	311159	tct	36
chr05	311115	311127	DEL	chr05	311125	311166	tct	36
chr05	311116	311122	DEL	chr05	311118	311141	tct	18
chr05	542240	542249	DEL	chr05	542240	542272	gct	27
chr05	568146	568158	DEL	chr05	568147	568203	cgg	36
chr05	593427	593442	DEL	chr05	593432	593488	ggc	45
chr05	593427	593442	DEL	chr05	593447	593497	ggc	45
chr05	742881	742887	DEL	chr05	742877	742900	aag	18
chr05	851802	851820	DEL	chr05	851803	851886	ctccgc	54
chr05	1010748	1010757	DEL	chr05	1010749	1010790	cgg	27
chr05	1050142	1050151	DEL	chr05	1050134	1050169	cgg	27
chr05	1050142	1050151	DEL	chr05	1050144	1050176	gcg	27
chr05	1050142	1050151	DEL	chr05	1050153	1050185	gcg	27
chr05	1302134	1302152	DEL	chr05	1302126	1302185	tca	54
chr05	1302134	1302152	DEL	chr05	1302138	1302197	agg	54
chr05	1302134	1302152	DEL	chr05	1302143	1302202	gct	54
chr05	1679037	1679043	DEL	chr05	1679031	1679054	gag	18
chr05	1829950	1829965	DEL	chr05	1829946	1830002	gccgtc	45
chr05	1829950	1829965	DEL	chr05	1829964	1830017	gcc	45
chr05	1829954	1829963	DEL	chr05	1829946	1829984	gccgtc	27
chr05	1829954	1829963	DEL	chr05	1829964	1829996	gcc	27
chr05	1829972	1829981	DEL	chr05	1829964	1829999	gcc	27
chr05	1829972	1829981	DEL	chr05	1829979	1830011	gcg	27
chr05	1889165	1889177	DEL	chr05	1889160	1889210	cgc	36
chr05	1889165	1889177	DEL	chr05	1889181	1889222	cgg	36
chr05	1927159	1927168	DEL	chr05	1927160	1927201	gcg	27
chr05	2002797	2002806	DEL	chr05	2002788	2002826	tcg	27
chr05	2002797	2002806	DEL	chr05	2002798	2002839	cgg	27
chr05	2027895	2027904	DEL	chr05	2027890	2027922	gcg	27
chr05	2027895	2027904	DEL	chr05	2027899	2027937	gcc	27
chr05	2045037	2045043	DEL	chr05	2045038	2045064	cat	18
chr05	2045101	2045110	DEL	chr05	2045102	2045143	ggc	27
chr05	2050599	2050605	DEL	chr05	2050593	2050616	gca	18
chr05	2089063	2089072	DEL	chr05	2089065	2089097	cct	27
chr05	2089063	2089072	DEL	chr05	2089074	2089106	cct	27
chr05	2104790	2104802	DEL	chr05	2104780	2104827	gcg	36
chr05	2104790	2104802	DEL	chr05	2104788	2104835	ggcgga	36
chr05	2104790	2104802	DEL	chr05	2104797	2104841	gga	36
chr05	2117286	2117298	DEL	chr05	2117286	2117327	gca	36
chr05	2217663	2217675	DEL	chr05	2217652	2217699	cgt	36
chr05	2217663	2217675	DEL	chr05	2217664	2217717	tcgccg	36
chr05	2381758	2381770	DEL	chr05	2381759	2381815	ccg	36
chr05	2387078	2387081	DEL	chr05	2387075	2387089	gga	9
chr05	2387117	2387120	DEL	chr05	2387114	2387128	gag	9
chr05	2595473	2595479	DEL	chr05	2595471	2595494	gag	18
chr05	2738631	2738640	DEL	chr05	2738622	2738654	gcg	27
chr05	2738631	2738640	DEL	chr05	2738626	2738658	cga	27
chr05	2738631	2738640	DEL	chr05	2738632	2738673	cgg	27
chr05	2899030	2899039	DEL	chr05	2899022	2899054	gcg	27
chr05	2899030	2899039	DEL	chr05	2899031	2899072	gcg	27
chr05	3195703	3195715	DEL	chr05	3195704	3195757	tcc	36
chr05	3526743	3526752	DEL	chr05	3526734	3526772	aaagaa	27
chr05	4134108	4134111	DEL	chr05	4134105	4134119	gag	9
chr05	4152980	4152986	DEL	chr05	4152976	4152999	gca	18
chr05	4152992	4153001	DEL	chr05	4152987	4153025	ggc	27
chr05	4250107	4250113	DEL	chr05	4250107	4250130	cgc	18
chr05	4314254	4314257	DEL	chr05	4314251	4314265	cct	9
chr05	4314321	4314333	DEL	chr05	4314311	4314352	gcg	36
chr05	4321823	4321835	DEL	chr05	4321838	4321879	tat	36
chr05	4559279	4559288	DEL	chr05	4559280	4559321	gcg	27
chr05	4610883	4610892	DEL	chr05	4610884	4610925	gcc	27
chr05	4613689	4613707	DEL	chr05	4613690	4613752	ccg	54
chr05	4613689	4613707	DEL	chr05	4613708	4613776	ccg	54
chr05	4662493	4662502	DEL	chr05	4662484	4662516	cgg	27
chr05	4662493	4662502	DEL	chr05	4662493	4662525	gcg	27
chr05	4684434	4684446	DEL	chr05	4684435	4684479	cgg	36
chr05	4684434	4684446	DEL	chr05	4684447	4684491	cgg	36
chr05	4835620	4835626	DEL	chr05	4835618	4835641	agc	18
chr05	4865572	4865578	DEL	chr05	4865566	4865589	cgg	18
chr05	4865572	4865578	DEL	chr05	4865573	4865599	gag	18
chr05	4875919	4875922	DEL	chr05	4875916	4875930	gcg	9
chr05	4965467	4965482	DEL	chr05	4965480	4965530	tct	45
chr05	4965467	4965482	DEL	chr05	4965485	4965535	tct	45
chr05	4965467	4965482	DEL	chr05	4965490	4965540	tct	45
chr05	4965511	4965532	DEL	chr05	4965490	4965558	tct	63
chr05	4965511	4965532	DEL	chr05	4965496	4965564	ctc	63
chr05	4971639	4971651	DEL	chr05	4971631	4971672	cct	36
chr05	4971639	4971651	DEL	chr05	4971640	4971693	cgcctc	36
chr05	5512849	5512852	DEL	chr05	5512846	5512860	aga	9
chr05	5554835	5554844	DEL	chr05	5554826	5554858	cag	27
chr05	5554835	5554844	DEL	chr05	5554836	5554877	ccg	27
chr05	5789447	5789456	DEL	chr05	5789444	5789476	tga	27
chr05	5940141	5940159	DEL	chr05	5940142	5940225	ctgtgc	54
chr05	5940166	5940172	DEL	chr05	5940160	5940189	ctgtgc	18
chr05	6237895	6237907	DEL	chr05	6237884	6237928	gtg	36
chr05	6348935	6348938	DEL	chr05	6348932	6348946	act	9
chr05	6419487	6419508	DEL	chr05	6419483	6419551	tct	63
chr05	6419487	6419508	DEL	chr05	6419487	6419555	cta	63
chr05	6419487	6419508	DEL	chr05	6419496	6419567	ctc	63
chr05	6419487	6419508	DEL	chr05	6419510	6419578	acc	63
chr05	6696498	6696507	DEL	chr05	6696495	6696530	ctc	27
chr05	6766541	6766550	DEL	chr05	6766545	6766583	cgc	27
chr05	6939650	6939665	DEL	chr05	6939642	6939692	gcg	45
chr05	6939650	6939665	DEL	chr05	6939651	6939713	cgc	45
chr05	6939650	6939665	DEL	chr05	6939672	6939722	cgg	45
chr05	7152406	7152412	DEL	chr05	7152407	7152433	cgt	18
chr05	7176522	7176534	DEL	chr05	7176517	7176558	agg	36
chr05	7450278	7450284	DEL	chr05	7450279	7450305	gag	18
chr05	8440548	8440557	DEL	chr05	8440545	8440577	tgc	27
chr05	8440548	8440557	DEL	chr05	8440549	8440590	gcg	27
chr05	13390995	13391004	DEL	chr05	13390996	13391037	ggc	27
chr05	13405360	13405369	DEL	chr05	13405361	13405402	gcg	27
chr05	13547448	13547457	DEL	chr05	13547439	13547483	gga	27
chr05	13547448	13547457	DEL	chr05	13547458	13547490	gag	27
chr05	13547451	13547457	DEL	chr05	13547445	13547474	gga	18
chr05	13606443	13606461	DEL	chr05	13606444	13606530	ccg	54
chr05	14799564	14799576	DEL	chr05	14799567	14799608	tgc	36
chr05	14997933	14997945	DEL	chr05	14997921	14997974	ccg	36
chr05	14997933	14997945	DEL	chr05	14997940	14997981	ccg	36
chr05	14997933	14997945	DEL	chr05	14997946	14997987	cgc	36
chr05	15078256	15078268	DEL	chr05	15078257	15078313	cga	36
chr05	15078316	15078325	DEL	chr05	15078317	15078358	gag	27
chr05	15131411	15131426	DEL	chr05	15131410	15131460	ggc	45
chr05	15131411	15131426	DEL	chr05	15131415	15131465	cgc	45
chr05	15131411	15131426	DEL	chr05	15131421	15131471	cga	45
chr05	15131411	15131426	DEL	chr05	15131430	15131480	cgc	45
chr05	15488120	15488126	DEL	chr05	15488121	15488147	gga	18
chr05	16506546	16506552	DEL	chr05	16506541	16506564	cga	18
chr05	16506546	16506552	DEL	chr05	16506547	16506573	cgg	18
chr05	16552298	16552301	DEL	chr05	16552295	16552309	tcc	9
chr05	16559795	16559798	DEL	chr05	16559792	16559806	cct	9
chr05	16662742	16662754	DEL	chr05	16662748	16662801	cgc	36
chr05	16918948	16918957	DEL	chr05	16918955	16918987	cgt	27
chr05	17336738	17336768	DEL	chr05	17336747	17336842	ctc	90
chr05	17522773	17522776	DEL	chr05	17522770	17522784	gcc	9
chr05	17614739	17614745	DEL	chr05	17614740	17614766	ctg	18
chr05	17633335	17633338	DEL	chr05	17633332	17633346	aga	9
chr05	17785922	17785931	DEL	chr05	17785923	17785955	cga	27
chr05	17870146	17870158	DEL	chr05	17870140	17870181	gaa	36
chr05	17870146	17870158	DEL	chr05	17870147	17870203	cgg	36
chr05	18629398	18629404	DEL	chr05	18629393	18629419	ggc	18
chr05	18772100	18772103	DEL	chr05	18772097	18772111	cgg	9
chr05	18862642	18862654	DEL	chr05	18862630	18862671	ctc	36
chr05	18892005	18892020	DEL	chr05	18892009	18892059	ctc	45
chr05	18892005	18892020	DEL	chr05	18892014	18892064	ctc	45
chr05	18892005	18892020	DEL	chr05	18892019	18892069	ctc	45
chr05	18892005	18892020	DEL	chr05	18892024	18892074	ctc	45
chr05	18970616	18970637	DEL	chr05	18970618	18970686	gcc	63
chr05	18970616	18970637	DEL	chr05	18970632	18970700	aga	63
chr05	18970616	18970637	DEL	chr05	18970639	18970710	gcc	63
chr05	18970616	18970637	DEL	chr05	18970652	18970720	ccg	63
chr05	18970639	18970651	DEL	chr05	18970632	18970673	aga	36
chr05	18970639	18970651	DEL	chr05	18970639	18970683	gcc	36
chr05	18970639	18970651	DEL	chr05	18970652	18970693	ccg	36
chr05	19490724	19490730	DEL	chr05	19490718	19490747	tccgac	18
chr05	19490761	19490773	DEL	chr05	19490757	19490798	cgc	36
chr05	19678193	19678214	DEL	chr05	19678211	19678279	ctc	63
chr05	19678193	19678214	DEL	chr05	19678225	19678293	tcc	63
chr05	19768878	19768884	DEL	chr05	19768879	19768905	gga	18
chr05	19999444	19999456	DEL	chr05	19999445	19999501	ctg	36
chr05	20286902	20286905	DEL	chr05	20286899	20286913	cga	9
chr05	20651318	20651327	DEL	chr05	20651319	20651351	cgc	27
chr05	20651318	20651327	DEL	chr05	20651328	20651360	cgc	27
chr05	20651333	20651336	DEL	chr05	20651330	20651344	ccg	9
chr05	21707148	21707151	DEL	chr05	21707145	21707159	cgg	9
chr05	22452516	22452528	DEL	chr05	22452523	22452567	cgt	36
chr05	22472044	22472062	DEL	chr05	22472026	22472085	gcg	54
chr05	22472044	22472062	DEL	chr05	22472043	22472102	gaa	54
chr05	22472044	22472062	DEL	chr05	22472055	22472114	agg	54
chr05	22789352	22789355	DEL	chr05	22789349	22789363	cgc	9
chr05	23101786	23101792	DEL	chr05	23101787	23101813	cgc	18
chr05	23195044	23195053	DEL	chr05	23195045	23195086	cgg	27
chr05	23319966	23319969	DEL	chr05	23319963	23319977	aga	9
chr05	23504138	23504150	DEL	chr05	23504137	23504178	acg	36
chr05	23642838	23642850	DEL	chr05	23642839	23642895	cca	36
chr05	23642853	23642862	DEL	chr05	23642844	23642888	acc	27
chr05	23642853	23642862	DEL	chr05	23642860	23642895	cct	27
chr05	23642859	23642862	DEL	chr05	23642856	23642870	acc	9
chr05	23666643	23666646	DEL	chr05	23666640	23666654	tct	9
chr05	23728555	23728564	DEL	chr05	23728556	23728594	aga	27
chr05	23803028	23803031	DEL	chr05	23803025	23803039	agg	9
chr05	23842451	23842463	DEL	chr05	23842448	23842489	cga	36
chr05	23943101	23943113	DEL	chr05	23943094	23943135	gcg	36
chr05	23943101	23943113	DEL	chr05	23943102	23943155	ggc	36
chr05	24070133	24070151	DEL	chr05	24070127	24070192	tcggcg	54
chr05	24070133	24070151	DEL	chr05	24070134	24070211	cgg	54
chr05	24126568	24126577	DEL	chr05	24126569	24126610	cgg	27
chr05	24271131	24271140	DEL	chr05	24271122	24271154	ccg	27
chr05	24271131	24271140	DEL	chr05	24271132	24271170	ccg	27
chr05	24571723	24571732	DEL	chr05	24571721	24571756	cgc	27
chr05	24571723	24571732	DEL	chr05	24571727	24571765	cgccga	27
chr05	25176728	25176737	DEL	chr05	25176729	25176770	ccg	27
chr05	25339656	25339671	DEL	chr05	25339649	25339699	gag	45
chr05	25339656	25339671	DEL	chr05	25339666	25339716	gta	45
chr05	25582070	25582076	DEL	chr05	25582064	25582087	ccg	18
chr05	25582070	25582076	DEL	chr05	25582072	25582098	gga	18
chr05	25624062	25624065	DEL	chr05	25624059	25624073	gta	9
chr05	25641704	25641710	DEL	chr05	25641705	25641731	gga	18
chr05	25771845	25771851	DEL	chr05	25771846	25771872	cca	18
chr05	25942541	25942553	DEL	chr05	25942537	25942578	gcg	36
chr05	25942541	25942553	DEL	chr05	25942542	25942595	gcaccg	36
chr05	26337293	26337296	DEL	chr05	26337290	26337304	tgg	9
chr05	26351582	26351588	DEL	chr05	26351578	26351601	gag	18
chr05	26351582	26351588	DEL	chr05	26351583	26351609	gag	18
chr05	26379932	26379935	DEL	chr05	26379929	26379943	tgc	9
chr05	26385601	26385607	DEL	chr05	26385604	26385627	ctc	18
chr05	26385603	26385609	DEL	chr05	26385604	26385627	ctc	18
chr05	26416301	26416313	DEL	chr05	26416292	26416333	tct	36
chr05	26416301	26416313	DEL	chr05	26416306	26416347	aga	36
chr05	26416301	26416313	DEL	chr05	26416316	26416357	aga	36
chr05	26464183	26464192	DEL	chr05	26464184	26464225	ccg	27
chr05	26987442	26987448	DEL	chr05	26987436	26987459	cca	18
chr05	26999068	26999092	DEL	chr05	26999044	26999121	ctg	72
chr05	26999068	26999092	DEL	chr05	26999064	26999141	cct	72
chr05	26999068	26999092	DEL	chr05	26999068	26999145	ctg	72
chr05	27122081	27122084	DEL	chr05	27122078	27122092	gct	9
chr05	27317472	27317487	DEL	chr05	27317469	27317519	cgc	45
chr05	27317472	27317487	DEL	chr05	27317483	27317533	cgg	45
chr05	27317472	27317487	DEL	chr05	27317492	27317542	cgg	45
chr05	27509255	27509267	DEL	chr05	27509247	27509288	cgt	36
chr05	27509255	27509267	DEL	chr05	27509256	27509312	cgg	36
chr05	27548674	27548683	DEL	chr05	27548678	27548710	gga	27
chr05	27691413	27691419	DEL	chr05	27691414	27691440	gag	18
chr05	27695314	27695323	DEL	chr05	27695315	27695356	cgc	27
chr05	28034449	28034455	DEL	chr05	28034450	28034476	ctc	18
chr05	28067940	28067946	DEL	chr05	28067941	28067967	cgg	18
chr05	28067949	28067955	DEL	chr05	28067943	28067972	gcg	18
chr05	28067949	28067955	DEL	chr05	28067953	28067976	cgc	18
chr05	28067952	28067961	DEL	chr05	28067943	28067981	gcg	27
chr05	28067952	28067961	DEL	chr05	28067953	28067994	cgc	27
chr05	28176580	28176586	DEL	chr05	28176581	28176607	ctc	18
chr05	28245097	28245100	DEL	chr05	28245094	28245108	tcg	9
chr05	28281157	28281163	DEL	chr05	28281151	28281174	gcc	18
chr05	28281157	28281163	DEL	chr05	28281156	28281179	cgg	18
chr05	28281180	28281183	DEL	chr05	28281177	28281191	cgg	9
chr05	28359034	28359037	DEL	chr05	28359031	28359045	agg	9
chr05	28464151	28464154	DEL	chr05	28464148	28464162	ctc	9
chr05	28471855	28471864	DEL	chr05	28471856	28471897	cgg	27
chr05	28487322	28487328	DEL	chr05	28487316	28487342	cgg	18
chr05	28487322	28487328	DEL	chr05	28487323	28487349	gga	18
chr05	28547556	28547565	DEL	chr05	28547548	28547583	cca	27
chr05	28547556	28547565	DEL	chr05	28547557	28547598	tct	27
chr05	28864153	28864162	DEL	chr05	28864154	28864195	gcg	27
chr05	29154667	29154673	DEL	chr05	29154664	29154690	gag	18
chr05	29154670	29154673	DEL	chr05	29154667	29154681	gag	9
chr05	29161569	29161575	DEL	chr05	29161570	29161596	gcg	18
chr05	29262179	29262191	DEL	chr05	29262180	29262236	aag	36
chr06	141810	141816	DEL	chr06	141804	141827	gag	18
chr06	150149	150161	DEL	chr06	150141	150182	ttc	36
chr06	150149	150161	DEL	chr06	150150	150203	gtctgc	36
chr06	221057	221072	DEL	chr06	221057	221113	agccgc	45
chr06	221057	221072	DEL	chr06	221064	221129	gcc	45
chr06	221063	221072	DEL	chr06	221057	221095	agccgc	27
chr06	221063	221072	DEL	chr06	221064	221105	gcc	27
chr06	233792	233804	DEL	chr06	233793	233846	gtccag	36
chr06	375803	375809	DEL	chr06	375801	375824	cct	18
chr06	397877	397883	DEL	chr06	397877	397900	tac	18
chr06	481588	481591	DEL	chr06	481585	481599	gga	9
chr06	523130	523142	DEL	chr06	523130	523171	cga	36
chr06	523130	523142	DEL	chr06	523131	523184	gacgaa	36
chr06	523139	523148	DEL	chr06	523130	523162	cga	27
chr06	523139	523148	DEL	chr06	523131	523175	gacgaa	27
chr06	523139	523148	DEL	chr06	523149	523181	gac	27
chr06	564605	564614	DEL	chr06	564600	564632	ctt	27
chr06	626040	626052	DEL	chr06	626028	626069	gag	36
chr06	626040	626052	DEL	chr06	626041	626082	cgg	36
chr06	626040	626052	DEL	chr06	626053	626097	cgg	36
chr06	626052	626058	DEL	chr06	626053	626079	cgg	18
chr06	869756	869768	DEL	chr06	869749	869790	ggc	36
chr06	869756	869768	DEL	chr06	869757	869804	ggc	36
chr06	869756	869768	DEL	chr06	869766	869813	ggcgga	36
chr06	896319	896328	DEL	chr06	896320	896361	gct	27
chr06	922262	922271	DEL	chr06	922263	922304	gcc	27
chr06	1028780	1028783	DEL	chr06	1028777	1028791	tga	9
chr06	1292212	1292224	DEL	chr06	1292208	1292249	cct	36
chr06	1292254	1292257	DEL	chr06	1292251	1292265	tcc	9
chr06	1520798	1520807	DEL	chr06	1520803	1520835	tac	27
chr06	1580313	1580319	DEL	chr06	1580310	1580336	ggc	18
chr06	1842772	1842778	DEL	chr06	1842773	1842799	gga	18
chr06	1860929	1860953	DEL	chr06	1860908	1860985	cgg	72
chr06	1860929	1860953	DEL	chr06	1860926	1861003	cgg	72
chr06	1860929	1860953	DEL	chr06	1860933	1861010	cgg	72
chr06	1860929	1860953	DEL	chr06	1860969	1861046	tcg	72
chr06	1864562	1864565	DEL	chr06	1864559	1864573	gcc	9
chr06	1880619	1880637	DEL	chr06	1880604	1880663	cgc	54
chr06	1963524	1963539	DEL	chr06	1963528	1963578	gcg	45
chr06	1963524	1963539	DEL	chr06	1963538	1963588	gcg	45
chr06	1963524	1963539	DEL	chr06	1963543	1963593	gcg	45
chr06	1963524	1963539	DEL	chr06	1963548	1963598	ggt	45
chr06	2105297	2105306	DEL	chr06	2105291	2105329	cct	27
chr06	2105297	2105306	DEL	chr06	2105304	2105339	ccg	27
chr06	2111627	2111639	DEL	chr06	2111618	2111659	gct	36
chr06	2111627	2111639	DEL	chr06	2111628	2111672	gcg	36
chr06	2111627	2111639	DEL	chr06	2111640	2111684	gcg	36
chr06	2246634	2246637	DEL	chr06	2246631	2246645	gcg	9
chr06	2405521	2405524	DEL	chr06	2405518	2405532	cgc	9
chr06	2832543	2832561	DEL	chr06	2832540	2832605	gagcga	54
chr06	2832549	2832561	DEL	chr06	2832540	2832587	gagcga	36
chr06	2855503	2855509	DEL	chr06	2855501	2855524	gag	18
chr06	2863472	2863481	DEL	chr06	2863473	2863514	cgc	27
chr06	2874426	2874438	DEL	chr06	2874422	2874463	ctt	36
chr06	2874426	2874438	DEL	chr06	2874436	2874483	caatcc	36
chr06	2995828	2995840	DEL	chr06	2995829	2995885	ggc	36
chr06	3042276	3042285	DEL	chr06	3042267	3042299	gtc	27
chr06	3042276	3042285	DEL	chr06	3042277	3042318	gcg	27
chr06	3056162	3056165	DEL	chr06	3056159	3056173	cct	9
chr06	3158382	3158385	DEL	chr06	3158379	3158393	ccg	9
chr06	3181673	3181700	DEL	chr06	3181653	3181739	gcg	81
chr06	3181673	3181700	DEL	chr06	3181702	3181788	gga	81
chr06	3181673	3181700	DEL	chr06	3181709	3181795	tct	81
chr06	3181673	3181700	DEL	chr06	3181721	3181807	ctc	81
chr06	3181717	3181726	DEL	chr06	3181709	3181741	tct	27
chr06	3181717	3181726	DEL	chr06	3181721	3181753	ctc	27
chr06	3199411	3199417	DEL	chr06	3199406	3199429	tct	18
chr06	3199411	3199417	DEL	chr06	3199410	3199433	ctc	18
chr06	3277884	3277893	DEL	chr06	3277875	3277907	cca	27
chr06	3277884	3277893	DEL	chr06	3277885	3277923	cctcct	27
chr06	3277884	3277893	DEL	chr06	3277887	3277928	tcc	27
chr06	3337202	3337205	DEL	chr06	3337199	3337213	gcc	9
chr06	3346195	3346207	DEL	chr06	3346185	3346226	gcc	36
chr06	3346195	3346207	DEL	chr06	3346187	3346234	cgccgt	36
chr06	3346195	3346207	DEL	chr06	3346202	3346249	cggcga	36
chr06	3346201	3346213	DEL	chr06	3346189	3346236	ccgtcg	36
chr06	3346201	3346213	DEL	chr06	3346202	3346255	cggcga	36
chr06	3440174	3440186	DEL	chr06	3440175	3440231	cgc	36
chr06	3540153	3540174	DEL	chr06	3540135	3540203	gca	63
chr06	3540153	3540174	DEL	chr06	3540156	3540230	ccg	63
chr06	3540153	3540174	DEL	chr06	3540165	3540239	ccgcct	63
chr06	3540153	3540174	DEL	chr06	3540177	3540251	ccg	63
chr06	3595796	3595805	DEL	chr06	3595797	3595838	ccg	27
chr06	3656541	3656553	DEL	chr06	3656542	3656592	gcc	36
chr06	3823062	3823080	DEL	chr06	3823063	3823146	cgc	54
chr06	3927900	3927903	DEL	chr06	3927897	3927911	cag	9
chr06	3961469	3961481	DEL	chr06	3961469	3961510	gca	36
chr06	3961469	3961481	DEL	chr06	3961472	3961519	gcatcg	36
chr06	3961469	3961481	DEL	chr06	3961481	3961528	tcggcg	36
chr06	3961471	3961477	DEL	chr06	3961469	3961492	gca	18
chr06	3961480	3961492	DEL	chr06	3961469	3961510	gca	36
chr06	3961480	3961492	DEL	chr06	3961472	3961519	gcatcg	36
chr06	3961480	3961492	DEL	chr06	3961481	3961534	tcggcg	36
chr06	4015981	4015993	DEL	chr06	4015982	4016038	cgc	36
chr06	4190547	4190559	DEL	chr06	4190538	4190579	agg	36
chr06	4250773	4250779	DEL	chr06	4250767	4250790	acg	18
chr06	4250774	4250780	DEL	chr06	4250768	4250791	cga	18
chr06	4250849	4250852	DEL	chr06	4250846	4250860	gcg	9
chr06	4428742	4428751	DEL	chr06	4428743	4428784	cgc	27
chr06	4597881	4597899	DEL	chr06	4597863	4597922	ggc	54
chr06	4597881	4597899	DEL	chr06	4597879	4597938	ctc	54
chr06	4667521	4667536	DEL	chr06	4667522	4667593	cgc	45
chr06	4667571	4667577	DEL	chr06	4667572	4667598	agg	18
chr06	4700590	4700599	DEL	chr06	4700582	4700614	tcg	27
chr06	4700590	4700599	DEL	chr06	4700591	4700632	tcc	27
chr06	4874676	4874685	DEL	chr06	4874671	4874703	ggt	27
chr06	4874676	4874685	DEL	chr06	4874677	4874718	cgg	27
chr06	5008244	5008253	DEL	chr06	5008236	5008268	cgc	27
chr06	5008244	5008253	DEL	chr06	5008241	5008276	cgc	27
chr06	5008244	5008253	DEL	chr06	5008249	5008281	cgc	27
chr06	5008244	5008253	DEL	chr06	5008254	5008286	cgc	27
chr06	5018142	5018151	DEL	chr06	5018133	5018168	tcc	27
chr06	5018142	5018151	DEL	chr06	5018143	5018184	cgc	27
chr06	5179830	5179836	DEL	chr06	5179825	5179848	gct	18
chr06	5227429	5227441	DEL	chr06	5227434	5227475	gag	36
chr06	5227429	5227441	DEL	chr06	5227439	5227480	gag	36
chr06	5227429	5227441	DEL	chr06	5227444	5227485	gag	36
chr06	5227431	5227446	DEL	chr06	5227434	5227484	gag	45
chr06	5227431	5227446	DEL	chr06	5227439	5227489	gag	45
chr06	5227431	5227446	DEL	chr06	5227444	5227494	gag	45
chr06	5227431	5227446	DEL	chr06	5227449	5227499	gag	45
chr06	5227431	5227446	DEL	chr06	5227454	5227504	gag	45
chr06	5227522	5227537	DEL	chr06	5227515	5227565	gga	45
chr06	5227522	5227537	DEL	chr06	5227521	5227574	gag	45
chr06	5227522	5227537	DEL	chr06	5227538	5227588	gga	45
chr06	5614098	5614110	DEL	chr06	5614095	5614136	acc	36
chr06	5614098	5614110	DEL	chr06	5614099	5614155	ccg	36
chr06	5622008	5622014	DEL	chr06	5622003	5622026	cgg	18
chr06	5622008	5622014	DEL	chr06	5622014	5622037	ccg	18
chr06	5638286	5638295	DEL	chr06	5638286	5638318	tcg	27
chr06	5657893	5657896	DEL	chr06	5657890	5657904	tcg	9
chr06	5657934	5657940	DEL	chr06	5657935	5657961	gac	18
chr06	5688566	5688578	DEL	chr06	5688554	5688595	cag	36
chr06	5707819	5707834	DEL	chr06	5707811	5707861	ccg	45
chr06	5707819	5707834	DEL	chr06	5707817	5707873	cgc	45
chr06	5707819	5707834	DEL	chr06	5707835	5707885	cgc	45
chr06	5747159	5747162	DEL	chr06	5747156	5747170	act	9
chr06	5880453	5880468	DEL	chr06	5880446	5880496	gat	45
chr06	6060440	6060452	DEL	chr06	6060432	6060479	agc	36
chr06	6060440	6060452	DEL	chr06	6060442	6060483	gcg	36
chr06	6060440	6060452	DEL	chr06	6060447	6060488	gcg	36
chr06	6060440	6060452	DEL	chr06	6060450	6060497	gcgagc	36
chr06	6060457	6060469	DEL	chr06	6060447	6060488	gcg	36
chr06	6060457	6060469	DEL	chr06	6060450	6060503	gcgagc	36
chr06	6146813	6146822	DEL	chr06	6146813	6146848	cgc	27
chr06	6146813	6146822	DEL	chr06	6146823	6146855	gcc	27
chr06	6146823	6146835	DEL	chr06	6146813	6146857	cgc	36
chr06	6146823	6146835	DEL	chr06	6146823	6146867	gcc	36
chr06	6146823	6146835	DEL	chr06	6146836	6146880	ccg	36
chr06	6153395	6153407	DEL	chr06	6153397	6153438	gga	36
chr06	6222605	6222614	DEL	chr06	6222606	6222647	ccg	27
chr06	6250758	6250770	DEL	chr06	6250759	6250812	ccgcct	36
chr06	6254441	6254444	DEL	chr06	6254438	6254452	gga	9
chr06	6435888	6435897	DEL	chr06	6435885	6435917	gga	27
chr06	6435888	6435897	DEL	chr06	6435889	6435930	gaa	27
chr06	6480959	6480962	DEL	chr06	6480956	6480970	ttc	9
chr06	6652952	6652958	DEL	chr06	6652951	6652974	tgc	18
chr06	6794226	6794229	DEL	chr06	6794223	6794237	agg	9
chr06	7047362	7047377	DEL	chr06	7047363	7047413	cgg	45
chr06	7047362	7047377	DEL	chr06	7047376	7047435	ggc	45
chr06	7118867	7118870	DEL	chr06	7118864	7118878	acg	9
chr06	7139882	7139897	DEL	chr06	7139871	7139921	ggt	45
chr06	7139882	7139897	DEL	chr06	7139883	7139933	gag	45
chr06	7139882	7139897	DEL	chr06	7139890	7139949	agg	45
chr06	7139882	7139897	DEL	chr06	7139906	7139956	gat	45
chr06	7139886	7139889	DEL	chr06	7139883	7139897	gag	9
chr06	7247819	7247822	DEL	chr06	7247816	7247830	aga	9
chr06	7698506	7698518	DEL	chr06	7698507	7698560	gcggag	36
chr06	7709066	7709078	DEL	chr06	7709070	7709111	act	36
chr06	7709066	7709078	DEL	chr06	7709081	7709122	ctt	36
chr06	7806544	7806553	DEL	chr06	7806545	7806586	ggt	27
chr06	7923984	7923993	DEL	chr06	7923976	7924014	gct	27
chr06	7923984	7923993	DEL	chr06	7923988	7924026	gcg	27
chr06	8837893	8837899	DEL	chr06	8837890	8837916	gcc	18
chr06	9221431	9221440	DEL	chr06	9221424	9221456	tgc	27
chr06	9221431	9221440	DEL	chr06	9221432	9221473	tgc	27
chr06	10287651	10287657	DEL	chr06	10287655	10287678	atc	18
chr06	10875053	10875065	DEL	chr06	10875054	10875110	ggc	36
chr06	11034036	11034039	DEL	chr06	11034033	11034047	ctc	9
chr06	11189399	11189411	DEL	chr06	11189388	11189429	agt	36
chr06	11189399	11189411	DEL	chr06	11189398	11189445	acaaga	36
chr06	11189399	11189411	DEL	chr06	11189406	11189450	aag	36
chr06	11209893	11209905	DEL	chr06	11209885	11209929	cct	36
chr06	11209893	11209905	DEL	chr06	11209894	11209935	ccg	36
chr06	11209893	11209905	DEL	chr06	11209901	11209945	cgc	36
chr06	11288017	11288026	DEL	chr06	11288011	11288043	tcc	27
chr06	11499005	11499014	DEL	chr06	11499004	11499039	cgg	27
chr06	11499005	11499014	DEL	chr06	11499015	11499047	gcg	27
chr06	11499011	11499014	DEL	chr06	11499008	11499022	ggc	9
chr06	11499021	11499036	DEL	chr06	11499006	11499056	gcg	45
chr06	11499021	11499036	DEL	chr06	11499015	11499074	gcg	45
chr06	11499021	11499036	DEL	chr06	11499025	11499081	cggcga	45
chr06	11559600	11559609	DEL	chr06	11559591	11559623	cag	27
chr06	11559600	11559609	DEL	chr06	11559599	11559634	agc	27
chr06	11559600	11559609	DEL	chr06	11559610	11559642	cag	27
chr06	12062731	12062734	DEL	chr06	12062728	12062742	cct	9
chr06	12432470	12432482	DEL	chr06	12432470	12432511	cgg	36
chr06	12432470	12432482	DEL	chr06	12432471	12432524	ggcggt	36
chr06	12852753	12852759	DEL	chr06	12852754	12852780	ggc	18
chr06	13889536	13889539	DEL	chr06	13889533	13889547	agg	9
chr06	15335745	15335748	DEL	chr06	15335742	15335756	cct	9
chr06	15895572	15895590	DEL	chr06	15895554	15895613	gga	54
chr06	15895572	15895590	DEL	chr06	15895561	15895620	gct	54
chr06	15895572	15895590	DEL	chr06	15895569	15895628	tgc	54
chr06	15895572	15895590	DEL	chr06	15895598	15895660	ctg	54
chr06	16504535	16504544	DEL	chr06	16504530	16504562	ccg	27
chr06	16616164	16616170	DEL	chr06	16616165	16616191	gag	18
chr06	16745575	16745578	DEL	chr06	16745572	16745586	agg	9
chr06	17311340	17311346	DEL	chr06	17311341	17311367	ggc	18
chr06	17378383	17378392	DEL	chr06	17378374	17378406	ccg	27
chr06	17378383	17378392	DEL	chr06	17378375	17378413	cgccgt	27
chr06	17378383	17378392	DEL	chr06	17378384	17378422	cgt	27
chr06	18165210	18165225	DEL	chr06	18165211	18165279	cgg	45
chr06	19421829	19421841	DEL	chr06	19421817	19421858	gac	36
chr06	19421829	19421841	DEL	chr06	19421822	19421869	cgg	36
chr06	19421829	19421841	DEL	chr06	19421844	19421885	gga	36
chr06	19736610	19736613	DEL	chr06	19736607	19736621	tcc	9
chr06	19785220	19785226	DEL	chr06	19785221	19785247	cgg	18
chr06	19833751	19833754	DEL	chr06	19833748	19833762	gcc	9
chr06	20089084	20089090	DEL	chr06	20089078	20089107	acgccg	18
chr06	20089084	20089090	DEL	chr06	20089085	20089111	cgc	18
chr06	20456962	20456965	DEL	chr06	20456959	20456973	aga	9
chr06	20717800	20717806	DEL	chr06	20717801	20717827	agc	18
chr06	20717849	20717855	DEL	chr06	20717847	20717870	gag	18
chr06	20761514	20761529	DEL	chr06	20761515	20761571	ctgccg	45
chr06	20761514	20761529	DEL	chr06	20761517	20761579	gccgctgcc	45
chr06	20761514	20761529	DEL	chr06	20761523	20761573	gcc	45
chr06	20761514	20761529	DEL	chr06	20761526	20761582	gccgct	45
chr06	20761516	20761525	DEL	chr06	20761515	20761553	ctgccg	27
chr06	20761516	20761525	DEL	chr06	20761523	20761555	gcc	27
chr06	20809899	20809908	DEL	chr06	20809892	20809924	cgc	27
chr06	20809899	20809908	DEL	chr06	20809900	20809941	agc	27
chr06	20869455	20869467	DEL	chr06	20869450	20869491	tcc	36
chr06	20869455	20869467	DEL	chr06	20869454	20869495	ccg	36
chr06	20869455	20869467	DEL	chr06	20869456	20869509	gccgca	36
chr06	21060918	21060933	DEL	chr06	21060906	21060956	ctc	45
chr06	21218074	21218086	DEL	chr06	21218063	21218104	ggc	36
chr06	21218074	21218086	DEL	chr06	21218078	21218131	gcg	36
chr06	21435644	21435647	DEL	chr06	21435641	21435655	cga	9
chr06	21493227	21493239	DEL	chr06	21493217	21493261	ttc	36
chr06	21493227	21493239	DEL	chr06	21493224	21493271	tccctc	36
chr06	21493227	21493239	DEL	chr06	21493234	21493281	tctcct	36
chr06	21641944	21641956	DEL	chr06	21641932	21641973	cgc	36
chr06	21641944	21641956	DEL	chr06	21641942	21641983	gcc	36
chr06	21641944	21641956	DEL	chr06	21641948	21641992	gct	36
chr06	21641944	21641956	DEL	chr06	21641960	21642001	gct	36
chr06	21641947	21641950	DEL	chr06	21641944	21641958	cgc	9
chr06	21733548	21733551	DEL	chr06	21733545	21733559	cgg	9
chr06	22130027	22130051	DEL	chr06	22130009	22130086	cct	72
chr06	22130027	22130051	DEL	chr06	22130028	22130108	cgc	72
chr06	22130027	22130051	DEL	chr06	22130042	22130119	cga	72
chr06	22130027	22130051	DEL	chr06	22130052	22130135	cgc	72
chr06	22139343	22139355	DEL	chr06	22139340	22139381	tcg	36
chr06	22139343	22139355	DEL	chr06	22139344	22139397	cgg	36
chr06	22199971	22199983	DEL	chr06	22199972	22200025	gagtga	36
chr06	22254466	22254475	DEL	chr06	22254457	22254489	ccg	27
chr06	22254466	22254475	DEL	chr06	22254467	22254508	ctc	27
chr06	22800124	22800136	DEL	chr06	22800113	22800169	ggc	36
chr06	22800124	22800136	DEL	chr06	22800134	22800181	gag	36
chr06	22800149	22800161	DEL	chr06	22800137	22800181	gag	36
chr06	22836949	22836958	DEL	chr06	22836950	22836991	gcc	27
chr06	22836963	22836969	DEL	chr06	22836957	22836986	ccg	18
chr06	22836966	22836972	DEL	chr06	22836960	22836986	ccg	18
chr06	23381357	23381369	DEL	chr06	23381358	23381414	gct	36
chr06	23874683	23874686	DEL	chr06	23874680	23874694	cgg	9
chr06	23928795	23928804	DEL	chr06	23928794	23928832	cagcgg	27
chr06	23928795	23928804	DEL	chr06	23928802	23928837	gcg	27
chr06	24044687	24044711	DEL	chr06	24044671	24044748	cct	72
chr06	24044687	24044711	DEL	chr06	24044687	24044764	ccg	72
chr06	24044687	24044711	DEL	chr06	24044721	24044798	gag	72
chr06	24533762	24533774	DEL	chr06	24533760	24533801	act	36
chr06	25070981	25070999	DEL	chr06	25070965	25071024	tcg	54
chr06	25070981	25070999	DEL	chr06	25070982	25071050	gcg	54
chr06	25070981	25070999	DEL	chr06	25071004	25071063	cgt	54
chr06	25655598	25655604	DEL	chr06	25655594	25655617	tgg	18
chr06	25749852	25749867	DEL	chr06	25749842	25749898	ctcgcc	45
chr06	25749852	25749867	DEL	chr06	25749850	25749900	cgc	45
chr06	25749852	25749867	DEL	chr06	25749855	25749905	cgc	45
chr06	25749852	25749867	DEL	chr06	25749860	25749910	cgc	45
chr06	25749852	25749867	DEL	chr06	25749870	25749920	cgc	45
chr06	25900696	25900702	DEL	chr06	25900697	25900723	cga	18
chr06	25900710	25900713	DEL	chr06	25900707	25900721	gac	9
chr06	26227135	26227147	DEL	chr06	26227123	26227164	ctc	36
chr06	26227135	26227147	DEL	chr06	26227127	26227171	tct	36
chr06	26272902	26272908	DEL	chr06	26272898	26272921	ctc	18
chr06	26272902	26272908	DEL	chr06	26272903	26272929	ctc	18
chr06	26585659	26585668	DEL	chr06	26585660	26585701	gcg	27
chr06	26631966	26631972	DEL	chr06	26631969	26631995	ctc	18
chr06	26631968	26631974	DEL	chr06	26631969	26631995	ctc	18
chr06	26639663	26639666	DEL	chr06	26639660	26639674	cgg	9
chr06	26752626	26752635	DEL	chr06	26752620	26752652	gca	27
chr06	26752626	26752635	DEL	chr06	26752630	26752662	cct	27
chr06	27054184	27054187	DEL	chr06	27054181	27054195	cct	9
chr06	27284936	27284942	DEL	chr06	27284937	27284963	gag	18
chr06	27345702	27345711	DEL	chr06	27345703	27345744	cgc	27
chr06	27661102	27661108	DEL	chr06	27661106	27661129	ggc	18
chr06	27880031	27880043	DEL	chr06	27880032	27880085	ggc	36
chr06	27880036	27880051	DEL	chr06	27880032	27880094	ggc	45
chr06	27880036	27880051	DEL	chr06	27880052	27880108	cgg	45
chr06	27880051	27880060	DEL	chr06	27880042	27880077	gcg	27
chr06	27880051	27880060	DEL	chr06	27880052	27880090	cgg	27
chr06	27906554	27906560	DEL	chr06	27906552	27906575	aga	18
chr06	27964138	27964162	DEL	chr06	27964115	27964192	tgc	72
chr06	27964138	27964162	DEL	chr06	27964124	27964201	gac	72
chr06	27964138	27964162	DEL	chr06	27964158	27964235	ctt	72
chr06	28189613	28189619	DEL	chr06	28189614	28189640	cgg	18
chr06	28652835	28652844	DEL	chr06	28652837	28652878	cgc	27
chr06	28652836	28652845	DEL	chr06	28652837	28652878	cgc	27
chr06	28694899	28694905	DEL	chr06	28694895	28694918	ctc	18
chr06	28694899	28694905	DEL	chr06	28694900	28694926	ctc	18
chr06	28941382	28941388	DEL	chr06	28941376	28941402	tcc	18
chr06	28941382	28941388	DEL	chr06	28941386	28941409	cca	18
chr06	28974508	28974511	DEL	chr06	28974505	28974519	aga	9
chr06	29441677	29441686	DEL	chr06	29441676	29441711	ccg	27
chr06	29447492	29447498	DEL	chr06	29447486	29447515	cga	18
chr06	29447492	29447498	DEL	chr06	29447496	29447519	gag	18
chr06	29447495	29447504	DEL	chr06	29447486	29447524	cga	27
chr06	29447495	29447504	DEL	chr06	29447496	29447534	gag	27
chr06	29782135	29782144	DEL	chr06	29782129	29782161	gac	27
chr06	29782135	29782144	DEL	chr06	29782136	29782177	cgc	27
chr06	29871667	29871679	DEL	chr06	29871662	29871703	cct	36
chr06	29871667	29871679	DEL	chr06	29871668	29871712	cca	36
chr06	29871667	29871679	DEL	chr06	29871682	29871723	gcc	36
chr06	29892851	29892854	DEL	chr06	29892848	29892862	gag	9
chr06	29976902	29976908	DEL	chr06	29976903	29976929	cgg	18
chr06	30069713	30069716	DEL	chr06	30069710	30069724	ctc	9
chr06	30074639	30074651	DEL	chr06	30074628	30074669	cga	36
chr06	30117768	30117777	DEL	chr06	30117769	30117810	cca	27
chr06	30281672	30281684	DEL	chr06	30281673	30281729	cgc	36
chr06	30332524	30332530	DEL	chr06	30332518	30332541	tcc	18
chr06	30349967	30349976	DEL	chr06	30349968	30350009	aga	27
chr06	30381238	30381244	DEL	chr06	30381239	30381265	cgg	18
chr06	30408762	30408768	DEL	chr06	30408763	30408789	cca	18
chr06	30450445	30450454	DEL	chr06	30450437	30450469	gag	27
chr06	30450445	30450454	DEL	chr06	30450443	30450475	gaa	27
chr06	30450445	30450454	DEL	chr06	30450448	30450480	agg	27
chr06	30956567	30956579	DEL	chr06	30956564	30956605	cct	36
chr06	30976164	30976170	DEL	chr06	30976162	30976185	gcc	18
chr06	30976164	30976170	DEL	chr06	30976170	30976193	agc	18
chr06	30993283	30993298	DEL	chr06	30993289	30993339	ctc	45
chr06	30993283	30993298	DEL	chr06	30993294	30993344	ctc	45
chr06	30993283	30993298	DEL	chr06	30993298	30993348	tct	45
chr06	30993283	30993298	DEL	chr06	30993303	30993353	tct	45
chr06	31008069	31008081	DEL	chr06	31008057	31008101	acc	36
chr06	31069156	31069162	DEL	chr06	31069151	31069174	ctc	18
chr06	31069156	31069162	DEL	chr06	31069157	31069183	tct	18
chr06	31105437	31105440	DEL	chr06	31105434	31105448	cct	9
chr06	31132930	31132936	DEL	chr06	31132924	31132950	cgc	18
chr06	31151381	31151399	DEL	chr06	31151376	31151441	tgggtg	54
chr06	31151381	31151399	DEL	chr06	31151388	31151453	tgggtc	54
chr06	31151387	31151399	DEL	chr06	31151376	31151423	tgggtg	36
chr06	31151387	31151399	DEL	chr06	31151388	31151435	tgggtc	36
chr06	31181670	31181682	DEL	chr06	31181667	31181708	tcg	36
chr06	31181670	31181682	DEL	chr06	31181673	31181714	tcc	36
chr06	31181670	31181682	DEL	chr06	31181680	31181721	ctc	36
chr06	31181670	31181682	DEL	chr06	31181688	31181729	cct	36
chr07	42683	42692	DEL	chr07	42676	42708	agc	27
chr07	42683	42692	DEL	chr07	42693	42725	cga	27
chr07	53200	53203	DEL	chr07	53197	53211	cct	9
chr07	88343	88358	DEL	chr07	88351	88404	aga	45
chr07	131356	131365	DEL	chr07	131347	131382	agg	27
chr07	131356	131365	DEL	chr07	131356	131391	tac	27
chr07	131356	131365	DEL	chr07	131360	131398	actaca	27
chr07	143513	143519	DEL	chr07	143508	143534	gaa	18
chr07	143513	143519	DEL	chr07	143517	143540	gag	18
chr07	143516	143522	DEL	chr07	143510	143536	aga	18
chr07	143516	143522	DEL	chr07	143517	143543	gag	18
chr07	477585	477588	DEL	chr07	477582	477596	aga	9
chr07	583598	583610	DEL	chr07	583593	583643	ggc	36
chr07	583598	583610	DEL	chr07	583611	583655	ggc	36
chr07	583601	583610	DEL	chr07	583593	583634	ggc	27
chr07	583601	583610	DEL	chr07	583611	583643	ggc	27
chr07	634247	634259	DEL	chr07	634236	634277	tag	36
chr07	634247	634259	DEL	chr07	634243	634284	gca	36
chr07	809720	809735	DEL	chr07	809705	809761	tcacca	45
chr07	809720	809735	DEL	chr07	809735	809785	gaa	45
chr07	1089178	1089190	DEL	chr07	1089166	1089210	gcc	36
chr07	1089178	1089190	DEL	chr07	1089179	1089232	tcgccg	36
chr07	1165835	1165856	DEL	chr07	1165865	1165933	gct	63
chr07	1165871	1165880	DEL	chr07	1165865	1165897	gct	27
chr07	1165871	1165880	DEL	chr07	1165872	1165913	ccg	27
chr07	1201258	1201264	DEL	chr07	1201259	1201285	gcc	18
chr07	1201355	1201358	DEL	chr07	1201352	1201366	tct	9
chr07	1274620	1274629	DEL	chr07	1274621	1274662	ccg	27
chr07	1281491	1281500	DEL	chr07	1281482	1281526	cgg	27
chr07	1281491	1281500	DEL	chr07	1281501	1281533	ggc	27
chr07	1794606	1794615	DEL	chr07	1794611	1794643	gag	27
chr07	2144207	2144216	DEL	chr07	2144208	2144240	gcg	27
chr07	2144207	2144216	DEL	chr07	2144217	2144249	gcg	27
chr07	2488862	2488865	DEL	chr07	2488859	2488873	tcg	9
chr07	2984166	2984169	DEL	chr07	2984163	2984177	tct	9
chr07	2984180	2984183	DEL	chr07	2984177	2984191	tcc	9
chr07	3187159	3187171	DEL	chr07	3187160	3187216	cgc	36
chr07	3192251	3192260	DEL	chr07	3192244	3192279	ctt	27
chr07	3192251	3192260	DEL	chr07	3192252	3192293	tgc	27
chr07	3453953	3453965	DEL	chr07	3453948	3453989	cgt	36
chr07	3453953	3453965	DEL	chr07	3453966	3454007	cgg	36
chr07	3668929	3668938	DEL	chr07	3668930	3668971	gct	27
chr07	3960541	3960547	DEL	chr07	3960542	3960568	ctg	18
chr07	4091990	4092002	DEL	chr07	4091991	4092047	gcg	36
chr07	4143425	4143437	DEL	chr07	4143414	4143458	cat	36
[truncated: 1,412 more rows]

## Sheet: Validation
DELETION
CHR	START	END	TYPE	LENGTH	CLUST_ID	FREQ	Geno	Validation	Remark	TE Info	Overlap w/ TE (bp)	Callers*
chr01	771668	771688	DEL	20	2025	161	0/1	PARTIAL	DEL_in_DUP	.	0	P
chr01	8000031	8000047	DEL	16	20626	184	1/1	TRUE		.	0	P	* P-Pindel, D-Delly, G-GROM, L-Lumpy
chr01	8303217	8303279	DEL	62	20972	198	0/0	TRUE		ID=DTM_11538;Name=DNAt_Mutator	62	GL
chr01	11674994	11675021	DEL	27	28659	1381	0/1	TRUE		.	0	P
chr01	12597941	12610973	DEL	13032	31331	2101	1/1	TRUE		ID=RLG_17891;Name=LTR_Gypsy	12904	DGL
chr01	13852017	13852363	DEL	346	35011	1053	1/1	TRUE	DEL_in_TRA	ID=DTM_19482;Name=DNAt_Mutator	336	PDL
chr01	17559579	17559614	DEL	35	44365	298	0/1	FALSE		.	0	P
chr01	22693443	22693456	DEL	13	54379	1032	1/1	TRUE		ID=DTM_30635;Name=DNAt_Mutator	13	P
chr01	23557804	23559572	DEL	1768	56547	320	1/1	PARTIAL	longer	.	0	DL
chr01	23658013	23658031	DEL	18	56920	1674	1/1	TRUE		.	0	P
chr01	24979357	24979374	DEL	17	60638	181	1/1	TRUE		ID=DTM_34037;Name=DNAt_Mutator	17	P
chr01	26764152	26769350	DEL	5198	63666	2265	1/1	TRUE		.	0	DGL
chr01	28234022	28234061	DEL	39	66501	1271	0/1	TRUE		.	0	P
chr01	31435222	31435239	DEL	17	72688	376	1/1	TRUE		ID=RIL_42585;Name=LINE_L1	17	P
chr01	34099589	34099648	DEL	59	78613	87	1/1	TRUE		.	0	PDG
chr01	34589600	34596038	DEL	6438	79785	2453	1/1	TRUE		ID=RLC_46685;Name=LTR_Copia	6438	DGL
chr01	39307666	39307687	DEL	21	85888	721	1/1	TRUE		.	0	P
chr02	3043006	3048470	DEL	5464	99891	2546	1/1	FALSE		ID=DTM_61903;Name=DNAt_Mutator	4589	DL
chr02	3547015	3547031	DEL	16	100462	105	1/1	TRUE		.	0	P
chr02	8124981	8124994	DEL	13	111706	1215	1/1	TRUE		.	0	P
chr02	15116013	15127249	DEL	11236	124940	682	0/1	FALSE		ID=RLG_78548;Name=LTR_Gypsy	11236	P
chr02	16078189	16081179	DEL	2990	126226	2096	1/1	TRUE		ID=RLG_79805;Name=LTR_Gypsy	2990	DGL
chr02	17461256	17461270	DEL	14	128587	284	1/1	TRUE		.	0	P
chr02	18402262	18402294	DEL	32	130229	59	1/1	TRUE		.	0	PD
chr02	22256531	22256794	DEL	263	139007	883	1/1	TRUE		ID=DTT_89129;Name=DNAt_Tc-Mariner/Stowaway	263	DGL
chr02	23504348	23506809	DEL	2461	142189	1869	1/1	TRUE		ID=DHH_90926;Name=Helitron	1840	DL
chr02	25921767	25971935	DEL	50168	150789	749	0/1	FALSE		.	0	P
chr02	29656463	29656973	DEL	510	156345	1865	1/1	TRUE		.	0	DGL
chr02	29713251	29714222	DEL	971	156425	1994	1/1	TRUE		ID=RLC_99097;Name=LTR_Copia	971	DGL
chr03	6656835	6656878	DEL	43	177761	1000	1/1	TRUE		.	0	PD
chr03	8585410	8586249	DEL	839	180617	159	0/1	PARTIAL	longer	.	0	DGL
chr03	10405958	10405978	DEL	20	183557	2381	1/1	TRUE		.	0	P
chr03	13419101	13419111	DEL	10	188676	7	0/1	PARTIAL	DEL_in_DUP	ID=RLG_124494;Name=LTR_Gypsy	10	P
chr03	22480818	22480828	DEL	10	209056	1500	1/1	TRUE		.	0	P
chr03	23039180	23039209	DEL	29	209927	1589	0/1	PARTIAL	longer	.	0	P
chr03	24956752	24958146	DEL	1394	213518	1752	1/1	TRUE		ID=DTM_140690;Name=DNAt_Mutator	1383	DGL
chr03	28965209	28965663	DEL	454	220534	287	1/1	TRUE		.	0	DGL
chr03	32063594	32063612	DEL	18	225010	1477	1/1	TRUE		.	0	P
chr03	36357041	36357075	DEL	34	233293	22	1/1	TRUE		.	0	PD
chr04	638312	642394	DEL	4082	234977	2047	1/1	PARTIAL	longer	.	0	DL
chr04	5170639	5173644	DEL	3005	248611	2586	1/1	TRUE		ID=RLG_162567;Name=LTR_Gypsy	2430	DGL
chr04	13693682	13705161	DEL	11479	267489	335	0/1	FALSE		ID=RLG_171071;Name=LTR_Gypsy	5972	P
chr04	21409038	21412500	DEL	3462	285332	52	0/1	PARTIAL	longer	.	0	PDGL
chr04	23230930	23230961	DEL	31	288711	200	1/1	TRUE		.	0	P
chr04	24241267	24241297	DEL	30	290441	2	0/1	TRUE		ID=SSS_185529;Name=Simple_Repeat	29	P
chr04	30380333	30385528	DEL	5195	297233	645	0/1	FALSE		.	0	PDL
chr04	32332451	32332688	DEL	237	301893	2644	1/1	TRUE		ID=DTT_194913;Name=DNAt_Tc-Mariner/Stowaway	237	PDGL
chr05	6852473	6852557	DEL	84	324885	1080	1/1	TRUE		.	0	DGL
chr05	24915485	24920124	DEL	4639	356713	1492		PARTIAL	longer	ID=RLG_230805;Name=LTR_Gypsy	4364	GL
chr05	26032409	26048062	DEL	15653	358304	2004	1/1	TRUE		.	0	DGL
chr05	27697817	27697832	DEL	15	360764	1405	1/1	TRUE		ID=RLG_234324;Name=LTR_Gypsy	15	P
chr06	752633	756273	DEL	3640	365807	2262	1/1	TRUE		ID=RLG_237824;Name=LTR_Gypsy	3634	PDGL
chr06	1062841	1062960	DEL	119	366643	370	0/1	TRUE		.	0	PD
chr06	2761998	2762010	DEL	12	370766	167	1/1	TRUE		.	0	P
chr06	3159085	3159494	DEL	409	371711	998	1/1	TRUE		ID=RLC_241070;Name=LTR_Copia	402	DL
chr06	7106892	7106904	DEL	12	381449	685	1/1	TRUE		.	0	P
chr06	7993085	7993587	DEL	502	385031	79	1/1	PARTIAL	boundary	.	0	DGL
chr06	9084262	9084932	DEL	670	388558	502	1/1	TRUE		ID=RLG_250531;Name=LTR_Gypsy	667	DGL
chr06	16381760	16381779	DEL	19	404438	109	1/1	TRUE		.	0	P
chr06	17683061	17683086	DEL	25	408209	221	0/1	FALSE		ID=DTC_261308;Name=DNAt_CACTA/En-Spm	25	P
chr06	19412755	19412818	DEL	63	411111	647	1/1	TRUE		.	0	DL
chr06	21917022	21917058	DEL	36	417664	307	0/1	PARTIAL	longer	.	0	P
chr06	24934882	24944066	DEL	9184	424883	261	0/1	FALSE		.	0	PDGL
chr06	31033599	31033614	DEL	15	434981	1567	1/1	TRUE		.	0	P
chr07	127505	127519	DEL	14	435621	1498	1/1	TRUE	DEL_in_TRA	.	0	P
chr07	2683710	2683723	DEL	13	442801	257	1/1	TRUE		ID=DTT_283811;Name=DNAt_Tc-Mariner/Stowaway	13	P
chr07	3921271	3922120	DEL	849	444821	212	1/1	TRUE		.	0	DGL
chr07	16277724	16284141	DEL	6417	471887	1469	0/1	FALSE		ID=RLC_300220;Name=LTR_Copia	3587	PD
chr07	22731353	22731690	DEL	337	488827	2080	1/1	FALSE		ID=DTH_309282;Name=DNAt_Harbinger/Tourist	337	DGL
chr08	3706730	3719812	DEL	13082	511955	2108	1/1	TRUE		ID=RLG_323483;Name=LTR_Gypsy	10890	DGL
chr08	4496907	4496918	DEL	11	514896	1356	1/1	TRUE		.	0	P
chr08	4756303	4767721	DEL	11418	515707	2664	1/1	TRUE		ID=DTC_324996;Name=DNAt_CACTA/En-Spm	11415	PDGL
chr08	17444017	17461498	DEL	17481	548158	183	1/1	FALSE		.	0	DGL
chr08	17538270	17538285	DEL	15	548304	116	1/1	TRUE		.	0	P
chr08	22128110	22129200	DEL	1090	559995	1995	1/1	TRUE		ID=RLG_346764;Name=LTR_Gypsy	896	DGL
chr08	25080180	25080342	DEL	162	565346	841	1/1	TRUE		ID=DTH_351251;Name=DNAt_Harbinger/Tourist	162	DG
chr08	26806298	26806827	DEL	529	569018	27	1/1	PARTIAL	boundary	ID=DTM_353728;Name=DNAt_Mutator	350	DGL
chr08	28165366	28165376	DEL	10	572609	949	0/1	TRUE		.	0	P
chr09	3520627	3524860	DEL	4233	579265	1972		TRUE		ID=RLG_359361;Name=LTR_Gypsy	4233	GL
chr09	9322079	9322098	DEL	19	593976	36	1/1	TRUE		ID=DTC_366511;Name=DNAt_CACTA/En-Spm	19	P
chr09	10970379	10970389	DEL	10	597944	406	1/1	TRUE		ID=DTC_368850;Name=DNAt_CACTA/En-Spm	10	P
chr09	12128261	12128274	DEL	13	602428	458	1/1	TRUE		.	0	P
chr09	14566785	14566795	DEL	10	607280	1874	0/1	TRUE		.	0	P
chr09	16911572	16912181	DEL	609	612870	2475	1/1	TRUE		ID=DTA_378028;Name=DNAt_hAT	550	DGL
chr10	735951	735980	DEL	29	624850	802	1/1	TRUE		ID=RLG_387733;Name=LTR_Gypsy	29	P
chr10	4962047	4962395	DEL	348	637788	3	1/1	PARTIAL	longer	.	0	DG
chr10	7619000	7619022	DEL	22	643486	69	0/1	FALSE		ID=DTM_396538;Name=DNAt_Mutator	22	P
chr10	8516714	8516730	DEL	16	645861	1940	0/1	PARTIAL	longer	ID=RLG_397313;Name=LTR_Gypsy	16	P
chr10	8893125	8904652	DEL	11527	646365	310	0/1	TRUE		ID=RLG_397601;Name=LTR_Gypsy	9278	DGL
chr10	18832253	18845371	DEL	13118	670515	761	0/1	FALSE		.	0	P
chr10	20290395	20292742	DEL	2347	675074	643	1/1	PARTIAL	boundary	ID=RLG_414105;Name=LTR_Gypsy	1507	DL
chr11	5427627	5427643	DEL	16	693804	1569	1/1	TRUE		.	0	P
chr11	9849596	9849732	DEL	136	704160	860	1/1	TRUE		ID=RLG_431577;Name=LTR_Gypsy	136	DGL
chr11	16409633	16410239	DEL	606	716293	930	1/1	TRUE		ID=DTA_438987;Name=DNAt_hAT	591	DL
chr11	16755901	16757189	DEL	1288	717822	2113	1/1	TRUE		.	0	DGL
chr11	23661269	23661281	DEL	12	741457	27	0/1	PARTIAL	longer	ID=RLG_449817;Name=LTR_Gypsy	12	P
chr11	25576361	25576871	DEL	510	748983	37	1/1	PARTIAL	longer	ID=DTC_452671;Name=DNAt_CACTA/En-Spm	439	DL
chr11	25632979	25633746	DEL	767	749288	36	0/1	FALSE		.	0	PDGL
chr12	967360	967370	DEL	10	762804	412	1/1	TRUE	DEL_in_TRA	.	0	P
chr12	26610728	26615164	DEL	4436	831393	1416	0/1	TRUE		.	0	DGL
DUPLICATION
CHR	START	END	TYPE	LENGTH	Geno	Validation	Remark
chr06	20150868	20150924	DUP:TANDEM	56	0/1	FALSE
chr06	20992802	20995522	DUP	2720	1/1	TRUE
chr07	4714113	4715299	DUP	1186	0/1	TRUE
chr07	7970876	7970935	DUP:TANDEM	59	0/1	PARTIAL	Transposon
chr07	11745429	11760930	DUP:TANDEM	15501	0/1	TRUE
chr07	12121119	12121179	DUP:TANDEM	60	0/1	TRUE
chr07	15682971	15689939	DUP:TANDEM	6968	0/1	PARTIAL	Transposon
chr07	21860874	21860941	DUP:TANDEM	67	0/1	TRUE
chr08	4394395	4410025	DUP:TANDEM	15630	0/1	TRUE
chr08	6696769	6705632	DUP:TANDEM	8863	0/1	PARTIAL	Transposon
chr08	7771707	7775285	DUP	3578	0/1	PARTIAL	Transposon
chr08	10566377	10568706	DUP:TANDEM	2329	0/1	TRUE
chr08	12794416	12801815	DUP:TANDEM	7399	0/1	PARTIAL	Transposon
chr08	17123175	17123225	DUP:TANDEM	50	0/1	FALSE
chr09	2747492	3020155	DUP:TANDEM	272663	0/1	FALSE
chr09	4747289	4772002	DUP	24713	0/1	PARTIAL	Transposon
chr09	5189830	5192898	DUP	3068	1/1	FALSE
chr09	6297052	6317005	DUP:TANDEM	19953	0/1	TRUE
chr09	6506777	6575766	DUP:TANDEM	68989	0/1	FALSE
chr09	13229871	13234558	DUP:TANDEM	4687	0/1	PARTIAL
chr09	19920924	19921010	DUP:TANDEM	86	0/1	TRUE
chr09	21701553	21707883	DUP	6330	0/1	TRUE
chr09	21713647	21713708	DUP:TANDEM	61	0/1	TRUE
chr10	3250801	3366995	DUP:TANDEM	116194	0/1	TRUE	Long repeat
chr10	5258661	5258879	DUP:TANDEM	218	0/1	TRUE	LTR in reference
chr10	10787342	10926189	DUP:TANDEM	138847	0/1	TRUE	Inverted DUP
chr10	15214377	15218881	DUP:TANDEM	4504	0/1	TRUE
chr10	17322120	17361202	DUP	39082	1/1	FALSE
chr11	378162	383630	DUP:TANDEM	5468	0/1	PARTIAL	TE w/ LTR
chr11	10754159	10757695	DUP:TANDEM	3536	1/1	FALSE
chr11	15372213	15372262	DUP:TANDEM	49	0/1	TRUE
chr11	16471605	16485343	DUP:TANDEM	13738	0/1	FALSE	Deletion
chr11	17957435	17966907	DUP:TANDEM	9472	0/1	FALSE
chr11	23830421	23839252	DUP:TANDEM	8831	0/1	FALSE
chr11	23975571	23980583	DUP	5012	0/1	FALSE
chr11	27283775	27351663	DUP:TANDEM	67888	0/1	FALSE	Long TRA
chr12	932711	943498	DUP:TANDEM	10787	0/1	FALSE
chr12	6140612	6140895	DUP:TANDEM	283	0/1	FALSE
chr12	11774182	11778125	DUP:TANDEM	3943	0/1	FALSE
chr12	15339207	15344242	DUP	5035	0/1	FALSE
INVERSION
CHR	START	END	TYPE	LENGTH	Genotype	Validation	Remark
chr10	18038222	18038369	INV	147	1/1	TRUE
chr10	18720177	18721082	INV	921	0/1	FALSE
chr11	4473989	4474067	INV	86	0/1	FALSE	Palindrome
chr11	4907891	4908226	INV	339	0/1	FALSE
chr11	12184931	12185013	INV	82	0/1	FALSE
chr11	12279395	12279478	INV	83	0/1	FALSE
chr11	17078696	17238536	INV	159840	1/1	TRUE
chr11	19444724	19444781	INV	65	0/1	FALSE	Inverted TRA
chr11	21566067	21821160	INV	255093	0/1	FALSE
chr11	23212114	23212293	INV	189	0/1	FALSE
chr12	1221239	1221322	INV	83	0/1	FALSE
chr12	1445785	1513812	INV	68027	1/1	FALSE
chr12	8539286	8539899	INV	613	1/1	FALSE
chr12	10233836	10234476	INV	640	1/1	TRUE
chr12	10770718	10771102	INV	384	0/1	FALSE
chr12	14432195	14432300	INV	105	0/1	FALSE	TIR
chr12	17491530	17491622	INV	96	0/1	FALSE	large deletion
chr12	18323886	18324089	INV	207	0/1	FALSE
chr12	24097049	24097135	INV	86	0/1	FALSE
chr12	26731856	26872635	INV	140779	0/1	TRUE

## Sheet: MITE in Genes
Genes with MITE in 3' UTR
LOC_Os01g02120
LOC_Os01g02300
LOC_Os01g02960
LOC_Os01g03660
LOC_Os01g04330
LOC_Os01g04340
LOC_Os01g04380
LOC_Os01g04450
LOC_Os01g04950
LOC_Os01g05080
LOC_Os01g05170
LOC_Os01g05289
LOC_Os01g05470
LOC_Os01g05500
LOC_Os01g05800
LOC_Os01g06620
LOC_Os01g06670
LOC_Os01g08464
LOC_Os01g08850
LOC_Os01g10140
LOC_Os01g10290
LOC_Os01g11570
LOC_Os01g11620
LOC_Os01g12840
LOC_Os01g13300
LOC_Os01g14690
LOC_Os01g15490
LOC_Os01g19870
LOC_Os01g19990
LOC_Os01g20780
LOC_Os01g20950
LOC_Os01g21420
LOC_Os01g22249
LOC_Os01g24470
LOC_Os01g25150
LOC_Os01g25300
LOC_Os01g25320
LOC_Os01g25510
LOC_Os01g25540
LOC_Os01g25720
LOC_Os01g27480
LOC_Os01g29740
LOC_Os01g32090
LOC_Os01g36220
LOC_Os01g38244
LOC_Os01g41270
LOC_Os01g41730
LOC_Os01g41900
LOC_Os01g43360
LOC_Os01g43480
LOC_Os01g43490
LOC_Os01g43890
LOC_Os01g47130
LOC_Os01g47180
LOC_Os01g47450
LOC_Os01g47635
LOC_Os01g48550
LOC_Os01g48920
LOC_Os01g48950
LOC_Os01g49000
LOC_Os01g49740
LOC_Os01g49920
LOC_Os01g50860
LOC_Os01g51530
LOC_Os01g51700
LOC_Os01g51800
LOC_Os01g51870
LOC_Os01g52304
LOC_Os01g52570
LOC_Os01g53390
LOC_Os01g57340
LOC_Os01g57440
LOC_Os01g57610
LOC_Os01g58335
LOC_Os01g58550
LOC_Os01g59090
LOC_Os01g59730
LOC_Os01g59930
LOC_Os01g60290
LOC_Os01g60600
LOC_Os01g60670
LOC_Os01g64000
LOC_Os01g65730
LOC_Os01g66290
LOC_Os01g67170
LOC_Os01g67180
LOC_Os01g67630
LOC_Os01g67835
LOC_Os01g67920
LOC_Os01g68230
LOC_Os01g68290
LOC_Os01g68580
LOC_Os01g69050
LOC_Os01g70100
LOC_Os01g71060
LOC_Os01g71094
LOC_Os01g71240
LOC_Os01g71250
LOC_Os01g71262
LOC_Os01g72120
LOC_Os01g72240
LOC_Os01g72360
LOC_Os01g72370
LOC_Os01g72430
LOC_Os01g72530
LOC_Os01g72810
LOC_Os01g73000
LOC_Os01g73790
LOC_Os01g74160
LOC_Os02g01230
LOC_Os02g01270
LOC_Os02g02140
LOC_Os02g03020
LOC_Os02g03580
LOC_Os02g04670
LOC_Os02g04915
LOC_Os02g05600
LOC_Os02g05820
LOC_Os02g06400
LOC_Os02g08260
LOC_Os02g09420
LOC_Os02g10500
LOC_Os02g12350
LOC_Os02g12420
LOC_Os02g12680
LOC_Os02g13100
LOC_Os02g13260
LOC_Os02g13555
LOC_Os02g13850
LOC_Os02g14430
LOC_Os02g14680
LOC_Os02g15169
LOC_Os02g15700
LOC_Os02g15810
LOC_Os02g16030
LOC_Os02g17380
LOC_Os02g17920
LOC_Os02g17940
LOC_Os02g18180
LOC_Os02g18750
LOC_Os02g19040
LOC_Os02g21040
LOC_Os02g26720
LOC_Os02g28170
LOC_Os02g28470
LOC_Os02g32580
LOC_Os02g35840
LOC_Os02g37080
LOC_Os02g37140
LOC_Os02g38800
LOC_Os02g38820
LOC_Os02g39340
LOC_Os02g39910
LOC_Os02g40070
LOC_Os02g40700
LOC_Os02g41650
LOC_Os02g41680
LOC_Os02g41840
LOC_Os02g42134
LOC_Os02g42200
LOC_Os02g42412
LOC_Os02g42620
LOC_Os02g42740
LOC_Os02g42990
LOC_Os02g43560
LOC_Os02g44230
LOC_Os02g44235
LOC_Os02g45420
LOC_Os02g46600
LOC_Os02g47490
LOC_Os02g48184
LOC_Os02g48400
LOC_Os02g49850
LOC_Os02g49920
LOC_Os02g52650
LOC_Os02g52900
LOC_Os02g54780
LOC_Os02g57090
LOC_Os02g57420
LOC_Os02g57540
LOC_Os02g57740
LOC_Os03g01970
LOC_Os03g03200
LOC_Os03g04530
LOC_Os03g05530
LOC_Os03g06480
LOC_Os03g07570
LOC_Os03g08110
LOC_Os03g09060
LOC_Os03g09860
LOC_Os03g09880
LOC_Os03g10050
LOC_Os03g11980
LOC_Os03g13930
LOC_Os03g14440
LOC_Os03g14910
LOC_Os03g15080
LOC_Os03g15350
LOC_Os03g15370
LOC_Os03g15420
LOC_Os03g15570
LOC_Os03g16670
LOC_Os03g17130
LOC_Os03g18350
LOC_Os03g21600
LOC_Os03g22080
LOC_Os03g22610
LOC_Os03g25140
LOC_Os03g28389
LOC_Os03g28400
LOC_Os03g29260
LOC_Os03g29340
LOC_Os03g31594
LOC_Os03g35886
LOC_Os03g39610
LOC_Os03g39640
LOC_Os03g40250
LOC_Os03g42420
LOC_Os03g44200
LOC_Os03g44835
LOC_Os03g45760
LOC_Os03g47160
LOC_Os03g47190
LOC_Os03g49464
LOC_Os03g49524
LOC_Os03g50030
LOC_Os03g50470
LOC_Os03g50620
LOC_Os03g51380
LOC_Os03g51670
LOC_Os03g51680
LOC_Os03g53050
LOC_Os03g53510
LOC_Os03g55220
LOC_Os03g55450
LOC_Os03g55530
LOC_Os03g56320
LOC_Os03g57330
LOC_Os03g57530
LOC_Os03g58080
LOC_Os03g58580
LOC_Os03g58790
LOC_Os03g59350
LOC_Os03g59480
LOC_Os03g60960
LOC_Os03g61290
LOC_Os03g62330
LOC_Os03g62500
LOC_Os03g62580
LOC_Os04g01140
LOC_Os04g01290
LOC_Os04g01480
LOC_Os04g01570
LOC_Os04g01740
LOC_Os04g01990
LOC_Os04g02580
LOC_Os04g02620
LOC_Os04g02640
LOC_Os04g03796
LOC_Os04g05010
LOC_Os04g08190
LOC_Os04g08290
LOC_Os04g09580
LOC_Os04g09720
LOC_Os04g09920
LOC_Os04g10650
LOC_Os04g13210
LOC_Os04g21840
LOC_Os04g23580
LOC_Os04g27760
LOC_Os04g29550
LOC_Os04g31470
LOC_Os04g32330
LOC_Os04g33030
LOC_Os04g33780
LOC_Os04g34360
LOC_Os04g34930
LOC_Os04g35030
LOC_Os04g35300
LOC_Os04g35430
LOC_Os04g35510
LOC_Os04g37740
LOC_Os04g39320
LOC_Os04g39780
LOC_Os04g40070
LOC_Os04g40370
LOC_Os04g40500
LOC_Os04g40530
LOC_Os04g40540
LOC_Os04g40600
LOC_Os04g40620
LOC_Os04g41380
LOC_Os04g41620
LOC_Os04g41960
LOC_Os04g42140
LOC_Os04g42174
LOC_Os04g42720
LOC_Os04g45650
LOC_Os04g45750
LOC_Os04g46390
LOC_Os04g47140
LOC_Os04g47780
LOC_Os04g48820
LOC_Os04g49650
LOC_Os04g51040
LOC_Os04g51070
LOC_Os04g52260
LOC_Os04g52670
LOC_Os04g53220
LOC_Os04g53240
LOC_Os04g53330
LOC_Os04g53350
LOC_Os04g53530
LOC_Os04g53540
LOC_Os04g53620
LOC_Os04g54564
LOC_Os04g55505
LOC_Os04g55920
LOC_Os04g57880
LOC_Os04g57890
LOC_Os04g58330
LOC_Os04g59600
LOC_Os05g01270
LOC_Os05g02310
LOC_Os05g02435
LOC_Os05g02490
LOC_Os05g03174
LOC_Os05g04000
LOC_Os05g04060
LOC_Os05g04410
LOC_Os05g05100
LOC_Os05g05550
LOC_Os05g07720
LOC_Os05g08420
LOC_Os05g08790
LOC_Os05g08810
LOC_Os05g08820
LOC_Os05g08860
LOC_Os05g11710
LOC_Os05g11750
LOC_Os05g15140
LOC_Os05g15370
LOC_Os05g18730
LOC_Os05g25060
LOC_Os05g25400
LOC_Os05g25440
LOC_Os05g25540
LOC_Os05g26990
LOC_Os05g27680
LOC_Os05g31530
LOC_Os05g33130
LOC_Os05g33430
LOC_Os05g33554
LOC_Os05g35500
LOC_Os05g37520
LOC_Os05g37880
LOC_Os05g37970
LOC_Os05g39110
LOC_Os05g39220
LOC_Os05g39260
LOC_Os05g40810
LOC_Os05g40910
LOC_Os05g41050
LOC_Os05g43140
LOC_Os05g43450
LOC_Os05g44780
LOC_Os05g44900
LOC_Os05g47490
LOC_Os05g47820
LOC_Os05g49930
LOC_Os05g50140
LOC_Os06g01500
LOC_Os06g01790
LOC_Os06g01934
LOC_Os06g02040
LOC_Os06g02144
LOC_Os06g02930
LOC_Os06g03770
LOC_Os06g04480
LOC_Os06g04830
LOC_Os06g04840
LOC_Os06g05070
LOC_Os06g05590
LOC_Os06g05820
LOC_Os06g05900
LOC_Os06g06520
LOC_Os06g08080
LOC_Os06g08790
LOC_Os06g09910
LOC_Os06g10050
LOC_Os06g10880
LOC_Os06g10990
LOC_Os06g11070
LOC_Os06g11300
LOC_Os06g12330
LOC_Os06g13190
LOC_Os06g13350
LOC_Os06g13660
LOC_Os06g13940
LOC_Os06g14390
LOC_Os06g14420
LOC_Os06g15170
LOC_Os06g16210
LOC_Os06g17500
LOC_Os06g18010
LOC_Os06g19260
LOC_Os06g19640
LOC_Os06g19750
LOC_Os06g20390
LOC_Os06g20790
LOC_Os06g20879
LOC_Os06g32720
LOC_Os06g34660
LOC_Os06g36270
LOC_Os06g36520
LOC_Os06g37320
LOC_Os06g37440
LOC_Os06g37670
LOC_Os06g38940
LOC_Os06g39270
LOC_Os06g39906
LOC_Os06g40730
LOC_Os06g41030
LOC_Os06g41780
LOC_Os06g41800
LOC_Os06g44320
LOC_Os06g45510
LOC_Os06g45660
LOC_Os06g45890
LOC_Os06g47350
LOC_Os06g48320
LOC_Os06g48810
LOC_Os06g49880
LOC_Os06g51200
LOC_Os07g01600
LOC_Os07g02330
LOC_Os07g02780
LOC_Os07g02790
LOC_Os07g03060
LOC_Os07g03590
LOC_Os07g03710
LOC_Os07g04110
LOC_Os07g04810
LOC_Os07g07240
LOC_Os07g07790
LOC_Os07g09190
LOC_Os07g09490
LOC_Os07g12100
LOC_Os07g12520
LOC_Os07g12790
LOC_Os07g14160
LOC_Os07g22600
LOC_Os07g22710
LOC_Os07g22770
LOC_Os07g23169
LOC_Os07g25700
LOC_Os07g26595
LOC_Os07g26690
LOC_Os07g29794
LOC_Os07g30300
LOC_Os07g31884
LOC_Os07g32660
LOC_Os07g33320
LOC_Os07g33360
LOC_Os07g34070
LOC_Os07g34690
LOC_Os07g35260
LOC_Os07g35520
LOC_Os07g35600
LOC_Os07g35810
LOC_Os07g35970
LOC_Os07g37130
LOC_Os07g37454
LOC_Os07g38620
LOC_Os07g38800
LOC_Os07g38810
LOC_Os07g39240
LOC_Os07g40290
LOC_Os07g40940
LOC_Os07g44250
LOC_Os07g44780
LOC_Os07g46170
LOC_Os07g46360
LOC_Os07g46610
LOC_Os07g47100
LOC_Os07g48650
LOC_Os07g49140
LOC_Os08g02204
LOC_Os08g02690
LOC_Os08g02996
LOC_Os08g03420
LOC_Os08g04310
LOC_Os08g04430
LOC_Os08g04830
LOC_Os08g05490
LOC_Os08g05570
LOC_Os08g05620
LOC_Os08g06630
LOC_Os08g06659
LOC_Os08g07840
LOC_Os08g08700
LOC_Os08g09420
LOC_Os08g09450
LOC_Os08g09570
LOC_Os08g09700
LOC_Os08g09830
LOC_Os08g10250
LOC_Os08g10320
LOC_Os08g12600
LOC_Os08g16030
LOC_Os08g16120
LOC_Os08g17160
LOC_Os08g19105
LOC_Os08g19160
LOC_Os08g19670
LOC_Os08g20000
LOC_Os08g23930
LOC_Os08g25820
LOC_Os08g26875
LOC_Os08g28710
LOC_Os08g29600
LOC_Os08g29854
LOC_Os08g31040
LOC_Os08g31080
LOC_Os08g31930
LOC_Os08g32160
LOC_Os08g32500
LOC_Os08g32570
LOC_Os08g32750
LOC_Os08g34020
LOC_Os08g34150
LOC_Os08g36250
LOC_Os08g37700
LOC_Os08g39490
LOC_Os08g39500
LOC_Os08g40190
LOC_Os08g41550
LOC_Os08g41960
LOC_Os08g42580
LOC_Os08g42640
LOC_Os08g42690
LOC_Os08g42840
LOC_Os08g43050
LOC_Os08g43240
LOC_Os08g43580
LOC_Os08g43654
LOC_Os08g44210
LOC_Os08g44480
LOC_Os08g45060
LOC_Os09g02729
LOC_Os09g04995
LOC_Os09g09330
LOC_Os09g09790
LOC_Os09g10204
LOC_Os09g11450
LOC_Os09g11460
LOC_Os09g18360
LOC_Os09g21210
LOC_Os09g25560
LOC_Os09g27734
LOC_Os09g31025
LOC_Os09g34120
LOC_Os09g34180
LOC_Os09g36100
LOC_Os09g37020
LOC_Os09g37834
LOC_Os10g01100
LOC_Os10g01560
LOC_Os10g01660
LOC_Os10g03320
LOC_Os10g03600
LOC_Os10g03850
LOC_Os10g04890
LOC_Os10g05600
LOC_Os10g05680
LOC_Os10g07538
LOC_Os10g10990
LOC_Os10g11034
LOC_Os10g11060
LOC_Os10g11340
LOC_Os10g14020
LOC_Os10g20240
LOC_Os10g21560
LOC_Os10g23050
LOC_Os10g25040
LOC_Os10g25230
LOC_Os10g28690
LOC_Os10g28975
LOC_Os10g30790
LOC_Os10g33140
LOC_Os10g33690
LOC_Os10g33840
LOC_Os10g35436
LOC_Os10g35520
LOC_Os10g36160
LOC_Os10g36170
LOC_Os10g37880
LOC_Os10g39140
LOC_Os10g39300
LOC_Os10g40020
LOC_Os10g41720
LOC_Os10g41970
LOC_Os10g42410
LOC_Os10g42610
LOC_Os11g01836
LOC_Os11g03470
LOC_Os11g04894
LOC_Os11g05080
LOC_Os11g05100
LOC_Os11g05614
LOC_Os11g06220
LOC_Os11g06320
LOC_Os11g07430
LOC_Os11g09370
LOC_Os11g09640
LOC_Os11g09970
LOC_Os11g10050
LOC_Os11g10460
LOC_Os11g11730
LOC_Os11g11990
LOC_Os11g12620
LOC_Os11g13570
LOC_Os11g14300
LOC_Os11g14880
LOC_Os11g14900
LOC_Os11g18044
LOC_Os11g18320
LOC_Os11g24610
LOC_Os11g25160
LOC_Os11g26900
LOC_Os11g32320
LOC_Os11g32470
LOC_Os11g33090
LOC_Os11g35540
LOC_Os11g36000
LOC_Os11g36030
LOC_Os11g36060
LOC_Os11g36410
LOC_Os11g36450
LOC_Os11g37090
LOC_Os11g37130
LOC_Os11g37270
LOC_Os11g37540
LOC_Os11g37960
LOC_Os11g38000
LOC_Os11g38030
LOC_Os11g38130
LOC_Os11g38140
LOC_Os11g38260
LOC_Os11g39120
LOC_Os11g39290
LOC_Os11g39420
LOC_Os11g39650
LOC_Os11g41210
LOC_Os11g41365
LOC_Os11g42060
LOC_Os11g42200
LOC_Os11g42790
LOC_Os11g43830
LOC_Os11g44560
LOC_Os11g44920
LOC_Os11g44950
LOC_Os11g47140
LOC_Os11g47560
LOC_Os11g47620
LOC_Os11g47670
LOC_Os11g47830
LOC_Os11g48050
LOC_Os12g02370
LOC_Os12g03190
LOC_Os12g03510
LOC_Os12g06340
LOC_Os12g06740
LOC_Os12g07020
LOC_Os12g07280
LOC_Os12g07300
LOC_Os12g07370
LOC_Os12g07670
LOC_Os12g08740
LOC_Os12g09290
LOC_Os12g09540
LOC_Os12g09550
LOC_Os12g09570
LOC_Os12g12470
LOC_Os12g12664
LOC_Os12g12740
LOC_Os12g13730
LOC_Os12g14080
LOC_Os12g14132
LOC_Os12g14220
LOC_Os12g14330
LOC_Os12g15590
LOC_Os12g16080
LOC_Os12g16200
LOC_Os12g17570
LOC_Os12g18550
LOC_Os12g19381
LOC_Os12g21784
LOC_Os12g23760
LOC_Os12g25700
LOC_Os12g25720
LOC_Os12g28260
LOC_Os12g30920
LOC_Os12g31710
LOC_Os12g31830
LOC_Os12g33240
LOC_Os12g35060
LOC_Os12g36194
LOC_Os12g36850
LOC_Os12g37380
LOC_Os12g37760
LOC_Os12g37910
LOC_Os12g38380
LOC_Os12g38590
LOC_Os12g38610
LOC_Os12g39120
LOC_Os12g40560
LOC_Os12g40940
LOC_Os12g41380
LOC_Os12g41956
LOC_Os12g42060
LOC_Os12g42064
LOC_Os12g42100
LOC_Os12g42110
LOC_Os12g42150
LOC_Os12g42200
LOC_Os12g43450
LOC_Os12g44050
LOC_Os12g44100
LOC_Os12g44350

## Sheet: TE SVs
						CNVs												Pindel + Delly + GROM
						COMPLEX				DEL				DUP				DEL				INS				DUP				INV
Class	TE	Count	Average length	Max length	% TEs	Alternative calls	Events	% events	Mean calls per event	Alternative calls	Events	% events	Mean calls per event	Alternative calls	Events	% events	Mean calls per event	Alternative calls	Events	% events	Mean calls per event	Alternative calls	Events	% events	Mean calls per event	Alternative calls	Events	% events	Mean calls per event	Alternative calls	Events	% events	Mean calls per event
	BRN	702	465	38928	0.00142608	0	0	0	0	0	0	0	0	3521	4	0.0027933	878.055	0	0	0	0	0	0	0	0	0	0	0	0	0	0	0	0
	BTN	792	85	1088	0.00160891	0	0	0	0	0	0	0	0	0	0	0	0	0	0	0	0	0	0	0	0	0	0	0	0	0	0	0	0
	BXX	13	46	54	2.64089e-05	0	0	0	0	0	0	0	0	0	0	0	0	0	0	0	0	0	0	0	0	0	0	0	0	0	0	0	0
2	DHH	17385	463	13189	0.0353168	14069	83	0.0468133	169.486	27406	118	0.0717762	232.235	4441	36	0.0251397	123.327	316409	2155	0.0201434	146.825	1093	48	0.00297048	22.7661	2227	73	0.0209469	30.5027	890	98	0.0123332	9.08071
	DMM	17	75	142	3.45347e-05	0	0	0	0	0	0	0	0	0	0	0	0	0	0	0	0	0	0	0	0	0	0	0	0	0	0	0	0
2	DTA	18536	258	5109	0.0376551	4616	40	0.0225606	115.371	10793	71	0.0431873	151.993	1065	10	0.00698324	106.394	601502	8224	0.076872	73.1397	28791	661	0.040906	43.5561	2052	32	0.00918221	64.105	1326	378	0.0475711	3.50784
	DTB	8	21	45	1.62516e-05	0	0	0	0	0	0	0	0	0	0	0	0	0	0	0	0	0	0	0	0	0	0	0	0	0	0	0	0
2	DTC	17587	860	16405	0.0357272	21864	159	0.0896785	137.501	24314	152	0.0924574	159.95	29259	207	0.144553	141.341	620698	2181	0.0203864	284.592	5232	334	0.0206696	15.6642	1032	41	0.0117647	25.1646	1133	129	0.0162346	8.78226
2	DTH	64901	207	10358	0.131843	3469	15	0.00846024	231.113	6826	41	0.0249392	166.447	1263	5	0.00349162	252.096	1864512	36689	0.342942	50.8194	305963	6899	0.426945	44.3488	2358	91	0.0261119	25.9092	5033	1482	0.186509	3.39606
2	DTI	37580	111	2478	0.0763421	384	3	0.00169205	127.575	968	8	0.00486618	120.849	445	6	0.00418994	74.0433	186273	3065	0.0286494	60.774	0	0	0	0	295	44	0.0126255	6.70302	2917	415	0.0522275	7.02875
2	DTM	53126	328	9078	0.107923	21587	130	0.0733221	166.041	31236	178	0.108273	175.473	23471	147	0.102654	159.656	1445375	16853	0.15753	85.7636	106758	2699	0.167028	39.5545	1880	67	0.0192253	28.0555	16362	1455	0.183111	11.2453
2	DTN	952	248	981	0.00193395	0	0	0	0	0	0	0	0	0	0	0	0	28803	1716	0.0160399	16.7849	81	14	0.00086639	5.78158	3	1	0.000286944	2.9703	3	3	0.000377548	0.996678
	DTR	70	33	114	0.000142202	0	0	0	0	0	0	0	0	0	0	0	0	0	0	0	0	0	0	0	0	0	0	0	0	0	0	0	0
2	DTT	61715	170	5258	0.125371	704	6	0.00338409	117.138	3753	18	0.0109489	208.384	309	2	0.00139665	153.731	638513	19293	0.180337	33.0956	92620	2248	0.139118	41.2009	3765	74	0.0212339	50.8715	7269	2271	0.285804	3.20078
	DTX	35858	88	3890	0.0728439	710	3	0.00169205	235.88	426	1	0.000608273	421.782	6	1	0.000698324	5.94059	0	0	0	0	0	0	0	0	0	0	0	0	0	0	0	0
	DXX	4703	64	712	0.00955393	0	0	0	0	0	0	0	0	0	0	0	0	0	0	0	0	0	0	0	0	0	0	0	0	0	0	0	0
	RIJ	118	114	577	0.000239712	0	0	0	0	0	0	0	0	0	0	0	0	0	0	0	0	0	0	0	0	0	0	0	0	0	0	0	0
1	RIL	10416	529	7465	0.0211596	12926	69	0.0389171	187.306	16068	68	0.0413625	236.259	10048	44	0.0307263	228.312	187686	2105	0.019676	89.1616	58	5	0.000309425	11.5768	1738	18	0.00516499	96.5019	221	42	0.00528568	5.26065
	RIR	2	39	50	4.06291e-06	0	0	0	0	0	0	0	0	0	0	0	0	0	0	0	0	0	0	0	0	0	0	0	0	0	0	0	0
	RIT	14	40	68	2.84404e-05	0	0	0	0	0	0	0	0	0	0	0	0	0	0	0	0	0	0	0	0	0	0	0	0	0	0	0	0
	RIX	369	122	915	0.000749607	0	0	0	0	0	0	0	0	0	0	0	0	0	0	0	0	0	0	0	0	0	0	0	0	0	0	0	0
	RLB	1	17	17	2.03146e-06	0	0	0	0	0	0	0	0	0	0	0	0	0	0	0	0	0	0	0	0	0	0	0	0	0	0	0	0
1	RLC	14198	1072	17090	0.0288426	38497	204	0.115059	188.702	29461	172	0.104623	171.275	42025	247	0.172486	170.135	1015423	2775	0.0259387	365.917	11611	342	0.0211647	33.9493	125049	791	0.226973	158.088	5892	516	0.0649383	11.4184
1	RLE	413	1309	27856	0.000838991	659	12	0.00676819	54.8709	2158	10	0.00608273	215.584	0	0	0	0	12442	158	0.00147687	78.7419	0	0	0	0	10	4	0.00114778	2.49377	1521	15	0.00188774	101.332
1	RLG	36912	1964	63745	0.0749851	223082	1030	0.580936	216.582	128492	804	0.489051	159.814	144879	690	0.481844	209.967	2814736	7749	0.0724321	363.238	59524	2772	0.171545	21.4732	287159	2091	0.6	137.33	11485	995	0.12522	11.5426
	RLR	2	26	34	4.06291e-06	0	0	0	0	0	0	0	0	0	0	0	0	0	0	0	0	0	0	0	0	0	0	0	0	0	0	0	0
	RLX	6974	162	2192	0.0141674	93	1	0.000564016	92.0792	117	1	0.000608273	115.842	808	2	0.00139665	401.99	0	0	0	0	0	0	0	0	0	0	0	0	0	0	0	0
	RPP	33	35	109	6.7038e-05	0	0	0	0	0	0	0	0	0	0	0	0	0	0	0	0	0	0	0	0	0	0	0	0	0	0	0	0
1	RSU	10090	181	2683	0.0204974	170	1	0.000564016	168.317	0	0	0	0	0	0	0	0	57580	1780	0.0166382	32.3481	9546	133	0.00823071	71.769	432	24	0.00688666	17.9925	43	21	0.00264284	2.04664
	RXX	1972	73	2532	0.00400603	0	0	0	0	0	0	0	0	0	0	0	0	0	0	0	0	0	0	0	0	0	0	0	0	0	0	0	0
	RYD	2	22	27	4.06291e-06	0	0	0	0	0	0	0	0	0	0	0	0	0	0	0	0	0	0	0	0	0	0	0	0	0	0	0	0
3	SRC	578	2205	85563	0.00117418	5127	15	0.00846024	341.572	244	1	0.000608273	241.584	10430	22	0.0153631	473.876	1287	81	0.00075713	15.8869	3	3	0.000185655	0.996678	1334	71	0.020373	18.7861	266	48	0.00604078	5.54051
3	SRR	221	469	3881	0.000448952	0	0	0	0	0	0	0	0	0	0	0	0	0	0	0	0	2	1	6.1885e-05	1.9802	7	2	0.000573888	3.48259	0	0	0	0
	SRS	53	84	383	0.000107667	0	0	0	0	0	0	0	0	0	0	0	0	0	0	0	0	0	0	0	0	0	0	0	0	0	0	0	0
	SRT	127	1380	37423	0.000257995	0	0	0	0	0	0	0	0	5315	7	0.00488827	758.203	123	29	0.000271071	4.23992	0	0	0	0	143	32	0.00918221	4.46735	13	5	0.000629247	2.59481
	SRX	1	320	320	2.03146e-06	0	0	0	0	0	0	0	0	0	0	0	0	0	0	0	0	0	0	0	0	0	0	0	0	0	0	0	0
	SSL	34232	39	468	0.0695408	0	0	0	0	0	0	0	0	0	0	0	0	1776	151	0.00141144	11.7608	0	0	0	0	90	8	0.00229555	11.236	50	18	0.00226529	2.77624
	SSS	37131	47	405	0.07543	0	0	0	0	0	0	0	0	0	0	0	0	85653	1979	0.0184983	43.2807	0	0	0	0	503	21	0.00602582	23.941	194	55	0.00692172	3.52663
	SSX	98	34	117	0.000199083	0	0	0	0	0	0	0	0	0	0	0	0	0	0	0	0	0	0	0	0	0	0	0	0	0	0	0	0
	XXX	24356	67	2447	0.0494781	461	2	0.00112803	229.353	597	1	0.000608273	591.089	390	2	0.00139665	194.03	0	0	0	0	0	0	0	0	0	0	0	0	0	0	0	0
Total		492258				348418	1773			282859	1644			277675	1432			9878791	106983			621282	16159			430077	3485			54618	7946
